# Supplementary material for: Pharmacogenomics and genetic ancestry in Colombia: a study on all variant drug annotations of PharmGKB
Source: Front Pharmacol. 2025 Aug 29;16:1636451. doi: 10.3389/fphar.2025.1636451 (PMC12425994; doi:10.3389/fphar.2025.1636451)
Supplement: Supplementary file 1 [file Table2.xlsx]

## Sheet: Hoja1
Variant_Annotation_ID	Study_Parameters_ID	Study_Type	Study_Cases	Study_Controls	Characteristics	Characteristics_Type	Frequency_In_Cases	Allele_Of_Frequency_In_Cases	Frequency_In_Controls	Allele_Of_Frequency_In_Controls	P_Value	Ratio_Stat_Type	Ratio_Stat	Confidence_Interval_Start	Confidence_Interval_Stop	Biogeographical_Groups	Variant/Haplotypes	Gene	Drug(s)	PMID	Phenotype_Category	Significance	Notes	Sentence	Alleles	Specialty_Population	Metabolizer_types	isPlural	Is/Is_Not_associated	Direction_of_effect	PD/PK_terms	Multiple_drugs_And/or	Population_types	Population_Phenotypes_or_diseases	Multiple_phenotypes_or_diseases_And/or	Comparison_Allele(s)_or_Genotype(s)	Comparison_Metabolizer_types	PLQ	ATQCES	CLM	CHG	ATQPGC	AV_AFR	AV_EUR	Grupo	Variant_Allele
608178490	608178492	cohort	24		renal transplant recipients receiving tacrolimus	Study Cohort					= 0.05	Unknown				East Asian	rs1045642	ABCB1	lansoprazole	17190370	Other, Metabolism/PK	yes	in people with CYP2C19 extensive metabolizers status after renal transplantation	Allele G is associated with increased metabolism of lansoprazole as compared to genotype AA.	G			Is	Associated with	increased	metabolism of					AA		0.788	0.548	0.559	0.73		0.759	0.5535	SNP sin predominancia en alguna población	rs1045642-G
608431732	608431734	cohort	283		Hospitalized Caucasian patients aged 75 years or older	Study Cohort	0.07	C			= 0.0015	Unknown				European	rs1057910	CYP2C9	warfarin	19794411	Dosage	yes		Allele C is associated with decreased dose of warfarin.	C			Is	Associated with	decreased	dose of							0.5	0.058	0.064	0.01		0.255	0.061	SNP sin predominancia en alguna población	rs1057910-C
608431758	608431760	cohort	283		Hospitalized Caucasian patients aged 75 years or older	Study Cohort	0.132	T			= 0.0015	Unknown				European	rs1799853	CYP2C9	warfarin	19794411	Dosage	yes		Allele T is associated with decreased dose of warfarin.	T			Is	Associated with	decreased	dose of								0.089	0.122	0.035		0.035	0.1055	SNP sin predominancia en alguna población	rs1799853-T
608431768	608431770	cohort	283			Unknown	0.162	A			= 0.043	Unknown				European	rs1131873	EPHX1	warfarin	19794411	Dosage	yes		Allele A is associated with decreased dose of warfarin.	A			Is	Associated with	decreased	dose of							0.5	0.106	0.122	0.12		0.31	0.114	SNP sin predominancia en alguna población	rs1131873-A
608431774	608431776	cohort	283		elderly, frail inpatients	Study Cohort	0.445	T			= 1.0E-4	Unknown				European	rs9923231	VKORC1	warfarin	19794411	Dosage	yes		Allele T is associated with decreased dose of warfarin as compared to allele C.	T			Is	Associated with	decreased	dose of					C		0.5	0.326	0.42	0.145	0.377	0.3225	0.374333	SNP sin predominancia en alguna población	rs9923231-T
608431781	608431783	cohort	226			Unknown	0.065	A			= 0.023	Unknown				African American/Afro-Caribbean	rs7900194	CYP2C9	warfarin	20072124	Dosage	yes		Allele A is associated with decreased dose of warfarin as compared to allele G.	A			Is	Associated with	decreased	dose of					G		0.5	0.005	0	0.045		0.2725	0.0025	SNP sin predominancia en alguna población	rs7900194-A
608431789	608431791	cohort	226			Unknown	0.018	T			< 0.001	Unknown				African American/Afro-Caribbean	rs28371685	CYP2C9	warfarin	20072124	Dosage	yes		Allele T is associated with decreased dose of warfarin as compared to allele C.	T			Is	Associated with	decreased	dose of					C		0.5	0.002	0	0.025	0.002	0.2625	0.00133333	SNP sin predominancia en alguna población	rs28371685-T
608431793	608431795	cohort	226			Unknown	0.007	G			< 0.001	Unknown				African American/Afro-Caribbean	rs28371686	CYP2C9	warfarin	20072124	Dosage	yes		Allele G is associated with decreased dose of warfarin as compared to allele C.	G			Is	Associated with	decreased	dose of					C		0.5	0.002	0	0.005		0.2525	0.001	SNP sin predominancia en alguna población	rs28371686-G
608431797	608431799	cohort	108		patients with high (>90th percentile, n = 55) or low (<10th percentile, n = 53) warfarin dose requirements	Study Cohort					= 0.01	Unknown					rs339097	CALU	warfarin	20200517	Dosage	yes		Allele G is associated with increased dose of warfarin.	G			Is	Associated with	increased	dose of							0.571	0.02	0.016	0.125	0.02	0.348	0.0186667	SNP sin predominancia en alguna población	rs339097-G
608431827	608431829	GWAS	555			Unknown						Unknown				European	rs10871454	STX4	warfarin	18535201	Dosage	yes	This SNP accounted for ~25% of the variance in stabilized warfarin dose in a GWAS study. It was in perfect linkage disequilibrium (r2=1) with rs9923231 (VKORC1:-1639)	Allele T is associated with decreased dose of warfarin.	T			Is	Associated with	decreased	dose of							0.5	0.346	0.415	0.145	0.379	0.3225	0.38	SNP sin predominancia en alguna población	rs10871454-T
613976745	613976749	cohort	96		Epilepsy	Disease	0.135	G			= 0.0351	Unknown				East Asian	rs2234922	EPHX1	carbamazepine	15692831	Dosage, Metabolism/PK	yes	as part of a haplotype.	Allele G is associated with decreased metabolism of carbamazepine in people with Epilepsy as compared to allele A.	G			Is	Associated with	decreased	metabolism of		in people with	Disease:Epilepsy		A		0.526	0.167	0.17	0.335	0.17	0.4305	0.169	SNP sin predominancia en alguna población	rs2234922-G
613977249	613977253	cohort	200			Unknown					= 1.6E-8	Unknown				Multiple groups	rs2359612	PRSS53, VKORC1	warfarin	16270629	Dosage	yes	It is in strong linkage disequilibrium (r2>0.9) with rs9923231.	Allele A is associated with decreased dose of warfarin.	A			Is	Associated with	decreased	dose of							0.18	0.47	0.44	0.23	0.41	0.205	0.44	SNP sin predominancia en alguna población	rs2359612-A
613977311	613977314	cohort	61			Unknown					= 0.0058	Unknown				European	rs1136201	ERBB2	trastuzumab	17693647	Toxicity	yes	is associated with cardiotoxicity in breast cancer patients treated with trastuzumab.	Allele G is associated with response to trastuzumab.	G			Is	Associated with		response to							0.5	0.181	0.202	0.025		0.2625	0.1915	SNP sin predominancia en alguna población	rs1136201-G
613977365	613977367	cohort	30			Unknown					= 0.024	Unknown				East Asian	rs6280	DRD3	pramipexole	19396436	Efficacy	yes		Allele T is associated with increased response to pramipexole.	T			Is	Associated with	increased	response to							0.5	0.502	0.569	0.285	0.498	0.3925	0.523	SNP sin predominancia en alguna población	rs6280-T
613978582	613978586	cohort	281		Epilepsy	Disease					= 0.0066	Unknown				European	rs1057910	CYP2C9	phenytoin	15805193	Dosage, Metabolism/PK	yes		Allele C is associated with increased dose of phenytoin in people with Epilepsy as compared to allele A.	C			Is	Associated with	increased	dose of		in people with	Disease:Epilepsy		A		0.5	0.058	0.064	0.01		0.255	0.061	SNP sin predominancia en alguna población	rs1057910-C
613979204	613979206	cohort	120			Unknown					= 0.001	Unknown				East Asian	rs2661319	RGS4	risperidone	18204343	Efficacy	yes		Allele C is associated with decreased response to risperidone in people with Schizophrenia as compared to allele T.	C			Is	Associated with	decreased	response to		in people with	Disease:Schizophrenia		T		0.618	0.449	0.479		0.473	0.618	0.467	SNP sin predominancia en alguna población	rs2661319-C
613979290	613979292	cohort	120			Unknown					= 0.0239	Unknown				East Asian	rs1800497	ANKK1	risperidone	18855532	Efficacy	yes		Allele A is associated with increased response to risperidone in people with Schizophrenia as compared to allele G.	A			Is	Associated with	increased	response to		in people with	Disease:Schizophrenia		G		0.625	0.276	0.191	0.33	0.271	0.4775	0.246	SNP sin predominancia en alguna población	rs1800497-A
637879816	637879818	cohort	4886			Unknown						Unknown				Multiple groups, Asians (n = 1103), blacks (n = 670), and whites (n = 3113)	rs9934438	VKORC1	warfarin	20203262	Dosage	yes		Allele A is associated with decreased dose of warfarin as compared to allele G.	A			Is	Associated with	decreased	dose of					G		0.5	0.405	0.42	0.145	0.377	0.3225	0.400667	SNP sin predominancia en alguna población	rs9934438-A
637879838	637879844	cohort	4886			Unknown						Unknown				Multiple groups, Asians (n = 1103), blacks (n = 670), and whites (n = 3113)	rs9923231	VKORC1	warfarin	20203262	Dosage	yes		Allele T is associated with decreased dose of warfarin as compared to allele C.	T			Is	Associated with	decreased	dose of					C		0.5	0.326	0.42	0.145	0.377	0.3225	0.374333	SNP sin predominancia en alguna población	rs9923231-T
637879873	637879875	cohort	496		The G allele of rs339097 (the allele frequency was 0.14 in African Americans and 0.002 in Caucasians)	Study Cohort					= 0.03	Unknown				Multiple groups	rs339097	CALU	warfarin	20200517	Dosage	yes		Allele G is associated with increased dose of warfarin.	G			Is	Associated with	increased	dose of							0.571	0.02	0.016	0.125	0.02	0.348	0.0186667	SNP sin predominancia en alguna población	rs339097-G
637879876	637879878	cohort	194		The G allele of rs339097 (the allele frequency was 0.14 in African Americans and 0.002 in Caucasians)	Study Cohort					= 0.03	Unknown				African American/Afro-Caribbean	rs339097	CALU	warfarin	20200517	Dosage	yes		Allele G is associated with increased dose of warfarin.	G			Is	Associated with	increased	dose of							0.571	0.02	0.016	0.125	0.02	0.348	0.0186667	SNP sin predominancia en alguna población	rs339097-G
637880237	637880239	cohort	1053			Unknown					= 0.0	Unknown				Unknown	rs9923231	VKORC1	warfarin	19300499	Dosage	yes		Allele T is associated with decreased dose of warfarin as compared to allele C.	T			Is	Associated with	decreased	dose of					C		0.5	0.326	0.42	0.145	0.377	0.3225	0.374333	SNP sin predominancia en alguna población	rs9923231-T
637880240	637880242	cohort	588			Unknown					= 0.0	Unknown				Unknown	rs9923231	VKORC1	warfarin	19300499	Dosage	yes		Allele T is associated with decreased dose of warfarin as compared to allele C.	T			Is	Associated with	decreased	dose of					C		0.5	0.326	0.42	0.145	0.377	0.3225	0.374333	SNP sin predominancia en alguna población	rs9923231-T
637880249	637880255	cohort	4943		IWPC	Study Cohort						Unknown				Multiple groups	rs9923231	VKORC1	warfarin	19228618	Dosage	yes		Allele T is associated with decreased dose of warfarin.	T			Is	Associated with	decreased	dose of							0.5	0.326	0.42	0.145	0.377	0.3225	0.374333	SNP sin predominancia en alguna población	rs9923231-T
637880256	637880262	cohort, GWAS	181			Unknown					= 0.0	Unknown				European	rs9923231	VKORC1	warfarin	18535201	Dosage	yes		Allele T is associated with decreased dose of warfarin as compared to allele C.	T			Is	Associated with	decreased	dose of					C		0.5	0.326	0.42	0.145	0.377	0.3225	0.374333	SNP sin predominancia en alguna población	rs9923231-T
655385756	655385760	clinical trial	40		Diabetes Mellitus, Type 2	Disease					= 0.018	Unknown				East Asian	rs5219	KCNJ11	repaglinide	20054294	Efficacy	yes		Allele T is associated with increased response to repaglinide in people with Diabetes Mellitus, Type 2 as compared to genotype CC.	T			Is	Associated with	increased	response to		in people with	Disease:Diabetes Mellitus, Type 2		CC		0.06	0.28	0.2	0.1	0.25	0.08	0.243333	SNP sin predominancia en alguna población	rs5219-T
655386824	655386826		250		Cancer	Disease					= 0.001	Unknown				East Asian	rs60369023	CDA	gemcitabine	17194903	Other, Metabolism/PK	yes	(decreased clearance)	Allele A is associated with decreased metabolism of gemcitabine in people with Neoplasms as compared to allele G.	A			Is	Associated with	decreased	metabolism of		in people with	Disease:Neoplasms		G				0	0.005		0.005	0	SNP sin predominancia en alguna población	rs60369023-A
655386834	655386837	case/control	140		major depressive disorder	Disease					= 0.014	Unknown				East Asian	rs2227631	SERPINE1	citalopram, fluoxetine	18794724	Efficacy	yes	(as haplotype with rs1799889-G)	Allele G is associated with decreased response to citalopram and fluoxetine in people with Depressive Disorder, Major as compared to allele A.	G			Is	Associated with	decreased	response to	and	in people with	Disease:Major Depressive Disorder		A		0.879	0.618	0.548	0.76	0.637	0.8195	0.601	SNP sin predominancia en alguna población	rs2227631-G
655386935	655386939	cohort	607		CAMP (Childhood Asthma Management Program)	Study Cohort					= 0.05	Unknown				European	rs7793837	CRHR2	salbutamol, selective beta-2-adrenoreceptor agonists	18408560	Efficacy	yes		Allele T is associated with decreased response to salbutamol and selective beta-2-adrenoreceptor agonists in people with Asthma as compared to allele A.	T	Pediatric		Is	Associated with	decreased	response to	and	in people with	Disease:Asthma		A		0.838	0.273	0.309	0.71	0.642	0.774	0.408	SNP predominantes en ancestría africana	rs7793837-T
655386940	655386943	cohort	152		LODO (individuals enrolled in a completed trial conducted by the American Lung Association Asthma Clinical Research Centers (ALA-ACRC) to evaluate the effectiveness of low dose Theophylline as add-on treatment in asthma (the LODO trial). The LODO trial was a multi-center, randomized, double-masked and placebo-controlled trial. Inclusion criteria include 15 years of age of older, a history of phys…	Study Cohort					= 0.03	Unknown				European	rs7793837	CRHR2	salbutamol, selective beta-2-adrenoreceptor agonists	18408560	Efficacy	yes		Allele T is associated with decreased response to salbutamol and selective beta-2-adrenoreceptor agonists in people with Asthma as compared to allele A.	T			Is	Associated with	decreased	response to	and	in people with	Disease:Asthma		A		0.838	0.273	0.309	0.71	0.642	0.774	0.408	SNP predominantes en ancestría africana	rs7793837-T
655387147	655387149		31		healthy volunteers	Disease					= 0.02	Unknown				European	rs10509681	CYP2C8	rosiglitazone	17178266	Dosage, Metabolism/PK	yes	(stated as for CYP2C8*3)	Allele C is associated with increased metabolism of rosiglitazone in healthy individuals as compared to allele T.	C			Is	Associated with	increased	metabolism of		in healthy individuals			T			0.092	0.117	0.04	0.106	0.04	0.105	SNP sin predominancia en alguna población	rs10509681-C
655387159	655387161		28		healthy volunteers	Disease					= 0.05	Unknown				European	rs10509681	CYP2C8	repaglinide	14534525	Dosage, Metabolism/PK	yes	(stated as for CYP2C8*3)	Allele C is associated with increased metabolism of repaglinide in healthy individuals as compared to allele T.	C			Is	Associated with	increased	metabolism of		in healthy individuals			T			0.092	0.117	0.04	0.106	0.04	0.105	SNP sin predominancia en alguna población	rs10509681-C
655387163	655387165		28		healthy volunteers	Disease					= 0.05	Unknown				European	rs11572080	CYP2C8	repaglinide	14534525	Dosage, Metabolism/PK	yes	(stated as for CYP2C8*3)	Allele T is associated with increased metabolism of repaglinide in healthy individuals as compared to allele C.	T			Is	Associated with	increased	metabolism of		in healthy individuals			C			0.089	0.117	0.04	0.098	0.04	0.101333	SNP sin predominancia en alguna población	rs11572080-T
655387624	655387628	cohort, clinical trial	125		Schizophrenia	Disease					= 0.031	Unknown				East Asian	rs1799978	DRD2	risperidone	17105675	Other	yes		Allele T is associated with increased response to risperidone in people with Schizophrenia as compared to allele C.	T			Is	Associated with	increased	response to		in people with	Disease:Schizophrenia		C		0.5	0.96	0.94	0.82	0.93	0.66	0.943333	SNP sin predominancia en alguna población	rs1799978-T
655388073	655388075		165		maintenance warfarin therapy	Drug					< 0.001	Unknown				European	rs7294	VKORC1	warfarin	16676068	Dosage, Metabolism/PK	yes		Allele T is associated with increased dose of warfarin.	T			Is	Associated with	increased	dose of							0.708	0.328	0.356	0.425	0.347	0.5665	0.343667	SNP sin predominancia en alguna población	rs7294-T
655388076	655388078		165		maintenance warfarin therapy	Drug					< 0.001	Unknown				European	rs9934438	VKORC1	warfarin	16676068	Dosage, Metabolism/PK	yes		Allele A is associated with decreased dose of warfarin.	A			Is	Associated with	decreased	dose of							0.5	0.405	0.42	0.145	0.377	0.3225	0.400667	SNP sin predominancia en alguna población	rs9934438-A
655388206	655388208	cohort	47		prostate cancer	Disease	0.15	G			= 0.0011	Unknown				Multiple groups, 43 white, 3 african american, 1 asian	rs6922548	PPARD	docetaxel, thalidomide	20038957	Efficacy	yes	(allele inferred by frequency comparison with dbSNP, actual base not listed in paper)	Allele G is associated with increased response to docetaxel and thalidomide in people with Prostatic Neoplasms as compared to allele A.	G			Is	Associated with	increased	response to	and	in people with	Disease:Prostatic Neoplasms		A		0.66	0.086	0.085	0.615	0.149	0.6375	0.106667	SNP sin predominancia en alguna población	rs6922548-G
655388209	655388211	cohort	47		prostate cancer	Disease	0.9	G			= 0.0055	Unknown				Multiple groups, 43 white, 3 african american, 1 asian	rs7769719	PPARD	docetaxel, thalidomide	20038957	Efficacy	yes	(allele inferred by frequency comparison with dbSNP, actual base not listed in paper)	Allele G is associated with increased response to docetaxel and thalidomide in people with Prostatic Neoplasms as compared to allele A.	G			Is	Associated with	increased	response to	and	in people with	Disease:Prostatic Neoplasms		A		0.34	0.94	0.95			0.34	0.945	SNP predominantes en ancestría europea	rs7769719-G
655388213	655388215	cohort	47		prostate cancer	Disease	0.32	C			= 0.0061	Unknown				Multiple groups, 43 white, 3 african american, 1 asian	rs1883322	PPARD	docetaxel, thalidomide	20038957	Efficacy	yes	(allele inferred by frequency comparison with dbSNP, actual base not listed in paper, dbSNP changed designation of this allele from G/A to C/T at build 132)	Allele C is associated with increased response to docetaxel and thalidomide in people with Prostatic Neoplasms as compared to allele T.	C			Is	Associated with	increased	response to	and	in people with	Disease:Prostatic Neoplasms		T		0.32	0.32	0.21	0.54	0.27	0.43	0.266667	SNP sin predominancia en alguna población	rs1883322-C
655388216	655388218	cohort	47		prostate cancer	Disease	0.42	A			= 5.0E-4	Unknown				Multiple groups, 43 white, 3 african american, 1 asian	rs12418	CHST3	docetaxel, thalidomide	20038957	Efficacy	yes	(allele inferred by frequency comparison with dbSNP, actual base not listed in paper)	Allele A is associated with increased response to docetaxel and thalidomide in people with Prostatic Neoplasms as compared to allele G.	A			Is	Associated with	increased	response to	and	in people with	Disease:Prostatic Neoplasms		G		0.611	0.235	0.452	0.36	0.461	0.4855	0.382667	SNP sin predominancia en alguna población	rs12418-A
655388232	655388234	cohort	47		prostate cancer	Disease			0.44		= 0.048	Unknown				Multiple groups, 43 white, 3 african american, 1 asian	rs1871450	CHST3	docetaxel, thalidomide	20038957	Efficacy	yes	(allele inferred by frequency comparison with data in pgkb, actual base not listed in paper)	Allele A is associated with increased response to docetaxel and thalidomide in people with Prostatic Neoplasms as compared to allele G.	A			Is	Associated with	increased	response to	and	in people with	Disease:Prostatic Neoplasms		G		0.611	0.354	0.452	0.36	0.461	0.4855	0.422333	SNP sin predominancia en alguna población	rs1871450-A
655388236	655388238	cohort	47		prostate cancer	Disease	0.32	C			= 0.0056	Unknown				Multiple groups, 43 white, 3 african american, 1 asian	rs2016520	PPARD	docetaxel, thalidomide	20038957	Efficacy	yes	(allele inferred by frequency comparison with dbSNP, actual base not listed in paper, dbSNP changed designation of this allele from G/A to C/T at build 132)	Allele C is associated with increased response to docetaxel and thalidomide in people with Prostatic Neoplasms as compared to allele T.	C			Is	Associated with	increased	response to	and	in people with	Disease:Prostatic Neoplasms		T		0.2	0.17	0.18	0.31	0.22	0.255	0.19	SNP sin predominancia en alguna población	rs2016520-C
655388251	655388253	cohort	47		prostate cancer	Disease	0.73	T			= 0.0089	Unknown				Multiple groups, 43 white, 3 african american, 1 asian	rs3734254	PPARD	docetaxel, thalidomide	20038957	Efficacy	yes	(allele inferred by frequency comparison with data in pgkb, actual base not listed in paper)	Allele T is associated with increased response to docetaxel and thalidomide in people with Prostatic Neoplasms as compared to allele C.	T			Is	Associated with	increased	response to	and	in people with	Disease:Prostatic Neoplasms		C		0.68	0.783	0.803		0.739	0.68	0.775	SNP sin predominancia en alguna población	rs3734254-T
655388254	655388256	cohort	47		prostate cancer	Disease	0.58	C			= 1.0E-4	Unknown				Multiple groups, 43 white, 3 african american, 1 asian	rs4148943	CHST3	docetaxel, thalidomide	20038957	Efficacy	yes	(allele inferred by frequency comparison with data in pgkb, actual base not listed in paper)	Allele C is associated with increased response to docetaxel and thalidomide in people with Prostatic Neoplasms as compared to allele T.	C			Is	Associated with	increased	response to	and	in people with	Disease:Prostatic Neoplasms		T		0.35	0.79	0.54			0.35	0.665	SNP sin predominancia en alguna población	rs4148943-C
655388257	655388259	cohort	47		prostate cancer	Disease	0.61	C			= 0.011	Unknown				Multiple groups, 43 white, 3 african american, 1 asian	rs4148945	CHST3	docetaxel, thalidomide	20038957	Efficacy	yes	(allele inferred by frequency comparison with data in pgkb, actual base not listed in paper)	Allele C is associated with increased response to docetaxel and thalidomide in people with Prostatic Neoplasms as compared to allele T.	C			Is	Associated with	increased	response to	and	in people with	Disease:Prostatic Neoplasms		T		0.5	0.83	0.59			0.5	0.71	SNP sin predominancia en alguna población	rs4148945-C
655388494	655388496	cohort	180		from one "specialized clinic"	Study Cohort					= 0.001	Unknown				Unknown	rs1057910	CYP2C9	warfarin	11127854	Dosage	yes	could only access abstract.	Allele C is associated with decreased dose of warfarin as compared to allele A.	C			Is	Associated with	decreased	dose of					A		0.5	0.058	0.064	0.01		0.255	0.061	SNP sin predominancia en alguna población	rs1057910-C
699638591	699638594	meta-analysis	161	531	anti-TNF non-responders	Drug	0.37	A	0.22	A	= 2.45E-4	Unknown				Unknown	rs1800629	TNF	adalimumab, etanercept, infliximab, Tumor necrosis factor alpha (TNF-alpha) inhibitors	19365401	Efficacy	yes		Allele A is associated with decreased response to adalimumab, etanercept, infliximab or Tumor necrosis factor alpha (TNF-alpha) inhibitors in people with Arthritis, Rheumatoid as compared to allele G.	A			Is	Associated with	decreased	response to	or	in people with	Disease:Rheumatoid arthritis		G		0.556	0.025	0.069	0.12		0.338	0.047	SNP sin predominancia en alguna población	rs1800629-A
699638917	699638920	cohort, clinical trial	143		Schizophrenia	Disease					= 0.032	Unknown				Multiple groups, 78 African American and 65 white patients	rs165599	COMT	risperidone	19451915	Efficacy	yes		Allele G is associated with increased response to risperidone in people with Schizophrenia.	G			Is	Associated with	increased	response to		in people with	Disease:Schizophrenia				0.39	0.59	0.43	0.72	0.43	0.555	0.483333	SNP sin predominancia en alguna población	rs165599-G
699638922	699638924	cohort, clinical trial	143		Schizophrenia	Disease					= 0.016	Unknown				Multiple groups, 78 African American and 65 white patients	rs724226	GRM3	risperidone	19451915	Efficacy	yes		Allele G is associated with increased response to risperidone in people with Schizophrenia.	G			Is	Associated with	increased	response to		in people with	Disease:Schizophrenia				0.781	0.778	0.819	0.79	0.77	0.7855	0.789	SNP sin predominancia en alguna población	rs724226-G
699638963	699638966		47		prostate cancer	Disease	0.4	C			= 0.0034	Unknown				Multiple groups, 43 white, 3 african american, 1 asian	rs730720	CHST3	docetaxel, thalidomide	20038957	Efficacy	yes	(allele inferred by frequency comparison with dbSNP, actual base not listed in paper, since frequencies are close have low confidence in this allele assignment)	Allele C is associated with increased response to docetaxel and thalidomide in people with Prostatic Neoplasms as compared to allele T.	C			Is	Associated with	increased	response to	and	in people with	Disease:Prostatic Neoplasms		T		0.34	0.76	0.53		0.51	0.34	0.6	SNP sin predominancia en alguna población	rs730720-C
699638971	699638974	cohort	47		prostate cancer	Disease	0.42	A			= 0.024	Unknown				Multiple groups, 43 white, 3 african american, 1 asian	rs4148950	CHST3	docetaxel, thalidomide	20038957	Efficacy	yes	(allele inferred by frequency comparison with dbSNP, actual base not listed in paper)	Allele A is associated with increased response to docetaxel and thalidomide in people with Prostatic Neoplasms as compared to allele G.	A			Is	Associated with	increased	response to	and	in people with	Disease:Prostatic Neoplasms		G		0.611	0.312	0.452	0.36	0.461	0.4855	0.408333	SNP sin predominancia en alguna población	rs4148950-A
699638975	699638977	cohort	47		prostate cancer	Disease	0.43	T			= 0.0023	Unknown				Multiple groups, 43 white, 3 african american, 1 asian	rs4148947	CHST3	docetaxel, thalidomide	20038957	Efficacy	yes	(allele inferred by frequency comparison with dbSNP, actual base not listed in paper, since frequencies are close have low confidence in this allele assignment)	Allele T is associated with increased response to docetaxel and thalidomide in people with Prostatic Neoplasms as compared to allele C.	T			Is	Associated with	increased	response to	and	in people with	Disease:Prostatic Neoplasms		C		0.39	0.66	0.55	0.64	0.54	0.515	0.583333	SNP sin predominancia en alguna población	rs4148947-T
699639154	699639162	cohort, clinical trial	608		CAMP (Childhood Asthma Management Program)	Study Cohort					= 0.03	Unknown				European	rs2267715	CRHR2	salbutamol	18408560	Efficacy	yes		Allele G is associated with decreased response to salbutamol in people with Asthma as compared to allele A.	G	Pediatric		Is	Associated with	decreased	response to		in people with	Disease:Asthma		A		0.5	0.55	0.44	0.8	0.5	0.65	0.496667	SNP sin predominancia en alguna población	rs2267715-G
699639185	699639191	cohort, clinical trial	427		SEPRACOR (asthma patients enrolled in an adult study of ß2 – agonist conducted by Sepracor Inc.)	Study Cohort					= 0.03	Unknown				European	rs2284220	CRHR2	salbutamol	18408560	Efficacy	yes		Allele G is associated with decreased response to salbutamol in people with Asthma as compared to allele A.	G			Is	Associated with	decreased	response to		in people with	Disease:Asthma		A		0.16	0.3	0.14	0.11	0.16	0.135	0.2	SNP sin predominancia en alguna población	rs2284220-G
699639201	699639205	cohort, clinical trial	607		CAMP (Childhood Asthma Management Program)	Study Cohort					= 0.02	Unknown				European	rs255100	CRHR2	salbutamol	18408560	Efficacy	yes	The A allele of this variant is associated with reduced bronchodilator response in CAMP cohort. However, this association is not significant in the other two cohorts tested.	Allele A is associated with decreased response to salbutamol in people with Asthma as compared to allele T.	A	Pediatric		Is	Associated with	decreased	response to		in people with	Disease:Asthma		T		0.5	0.54	0.45		0.48	0.5	0.49	SNP sin predominancia en alguna población	rs255100-A
699642174	699642176	cohort	182		major depression	Disease					= 0.007	Unknown				European	rs1487278	TPH2	mirtazapine, venlafaxine	18496129	Efficacy	yes		Allele C is associated with increased response to mirtazapine and venlafaxine in people with Depression as compared to genotype TT.	C			Is	Associated with	increased	response to	and	in people with	Disease:Depression		TT		0.5	0.065	0.223	0.075	0.213	0.2875	0.167	SNP sin predominancia en alguna población	rs1487278-C
699642186	699642188	clinical trial	182			Unknown					= 0.003	OR	2.55	1.36	4.76	European	rs10879346	TPH2	antidepressants	18496129	Efficacy	yes		Allele C is associated with increased response to antidepressants in people with Depressive Disorder, Major as compared to genotype TT.	C			Is	Associated with	increased	response to		in people with	Disease:Major Depressive Disorder		TT		0.36	0.52	0.59	0.64	0.59	0.5	0.566667	SNP sin predominancia en alguna población	rs10879346-C
748396572	748401135	cohort	40			Unknown					= 0.0018	Unknown				Multiple groups, white, African; American, and Hispanic men and women with hypertension	rs1801253	ADRB1	metoprolol	12844134	Efficacy	yes	The CC (Arg389) homozygous genotype was strongly associated with the DBP response to metoprolol with a significantly greater reduction in 24-hour and daytime DBP than was found in carriers of a G(Gly389) allele.	Allele C is associated with increased response to metoprolol in people with Hypertension as compared to allele G.	C			Is	Associated with	increased	response to		in people with	Disease:Hypertension		G		0.679	0.766	0.75	0.682	0.779	0.6805	0.765	SNP sin predominancia en alguna población	rs1801253-C
769146107	769146113	replication	166		Leukotriene Modifier or Corticosteroid or Corticosteroid Salmeterol trial (LOCCS)	Study Cohort					= 0.003	Unknown				European	rs2781659	ARG1	selective beta-2-adrenoreceptor agonists	18617639	Efficacy	yes		Allele A is associated with increased response to selective beta-2-adrenoreceptor agonists in people with Asthma as compared to allele G.	A			Is	Associated with	increased	response to		in people with	Disease:Asthma		G		0.27	0.72	0.56	0.44	0.56	0.355	0.613333	SNP sin predominancia en alguna población	rs2781659-A
769146304	769146307	cohort	1451			Unknown						Unknown				European	rs4086116	CYP2C9	acenocoumarol	19578179	Dosage	yes	from a GWAS study consisting of the; index population of 1451 Caucasian subjects from the Rotterdam study and results were replicated in 287 subjects from the Rotterdam study extended cohort. Results were reported as dosage change of -2.9mg/week per additional variant allele but allele was not specified, assumed T based on MAF from dbSNP.	Allele T is associated with decreased dose of acenocoumarol as compared to allele C.	T			Is	Associated with	decreased	dose of					C		0.5	0.063	0.202	0.2		0.35	0.1325	SNP sin predominancia en alguna población	rs4086116-T
769160740	769160742	cohort	200			Unknown					= 1.6E-8	Unknown				Multiple groups	rs8050894	VKORC1	warfarin	16270629	Dosage	yes	It is in strong linkage disequilibrium (r2>0.9) with rs9923231.	Allele G is associated with decreased dose of warfarin as compared to allele C.	G			Is	Associated with	decreased	dose of					C		0.545	0.445	0.441	0.275		0.41	0.443	SNP sin predominancia en alguna población	rs8050894-G
769164370	769164379	cohort	1245		Depressive Disorder, Major	Disease					= 0.016	OR	0.11	0.013	0.949	European	rs10975641	GLDC	citalopram, escitalopram	21107318	Efficacy	yes	Be careful- GC SNP. The paper states that the minor allele was assoc with decreased odds for remission(in the original cohort), and from dbSNP freq/orientation of fastA compared to Golden path, I believe G on the + chr strand to be the minor allele. For the STAR*D study, remission was not found to be significantly associated; the significant association was with "the binary phenotype "response"".	Allele G is associated with increased response to citalopram and escitalopram in people with Depressive Disorder, Major as compared to allele C.	G			Is	Associated with	increased	response to	and	in people with	Disease:Major Depressive Disorder		C		0.595	0.103	0.324		0.358	0.595	0.261667	SNP sin predominancia en alguna población	rs10975641-G
769164773	769164775		14		14 healthy subjects with the UGT2B15*2/*2 genotype were enrolled for this study. They were grouped by the UGT2B7 genotype into UGT2B7*1/*1 (n=5), UGT2B7*1/*2 (n=5), and UGT2B7*2/*2 (n=4) groups.	Study Cohort					< 0.05	Unknown				East Asian	rs7438284	UGT2B7	lorazepam, valproic acid	17687269	Efficacy	yes	as part of the UGT2B7*2 haplotype. All healthy volunteers were also UGT2B15*2 homozygotes.	Allele A is associated with increased response to lorazepam and valproic acid in healthy individuals as compared to allele T.	A			Is	Associated with	increased	response to	and	in healthy individuals			T		0.27	0.4	0.43			0.27	0.415	SNP sin predominancia en alguna población	rs7438284-A
769164776	769164778		14		14 healthy subjects with the UGT2B15*2/*2 genotype were enrolled for this study. They were grouped by the UGT2B7 genotype into UGT2B7*1/*1 (n=5), UGT2B7*1/*2 (n=5), and UGT2B7*2/*2 (n=4) groups.	Study Cohort					< 0.05	Unknown				East Asian	rs7439366	UGT2B7	lorazepam, valproic acid	17687269	Efficacy	yes	as part of the UGT2B7*2 haplotype. All healthy volunteers were also UGT2B15*2 homozygotes.	Allele T is associated with increased response to lorazepam and valproic acid in healthy individuals as compared to allele C.	T			Is	Associated with	increased	response to	and	in healthy individuals			C		0.27	0.4	0.43	0.79		0.53	0.415	SNP sin predominancia en alguna población	rs7439366-T
769166385	769166387	prospective	117		Phase II OPTIMOX 2 trial by the GERCOR group, all patients received FOLFOX 7 therapy	Study Cohort					= 0.004	Unknown				Unknown	rs1801131	MTHFR	fluorouracil, leucovorin, oxaliplatin	20078613	Efficacy	yes		Allele G is associated with increased response to fluorouracil, leucovorin and oxaliplatin in people with Colorectal Neoplasms as compared to allele T.	G			Is	Associated with	increased	response to	and	in people with	Disease:Colorectal Neoplasms		T		0.591	0.182	0.133	0.085	0.197	0.338	0.170667	SNP sin predominancia en alguna población	rs1801131-G
769166388	769166390	prospective	117		Phase II OPTIMOX 2 trial by the GERCOR group, all patients received FOLFOX 7 therapy	Study Cohort					= 0.042	Unknown				Unknown	rs1801133	MTHFR	fluorouracil, leucovorin, oxaliplatin	20078613	Efficacy	yes		Allele A is associated with increased response to fluorouracil, leucovorin and oxaliplatin in people with Colorectal Neoplasms as compared to allele G.	A			Is	Associated with	increased	response to	and	in people with	Disease:Colorectal Neoplasms		G		0.571	0.461	0.543	0.155	0.454	0.363	0.486	SNP sin predominancia en alguna población	rs1801133-A
769169634	769169639	cohort	22			Unknown					< 0.05	Unknown				European	rs1057910	CYP2C9	losartan	11823761	Metabolism/PK	yes		Allele C is associated with decreased metabolism of losartan in people with no disease as compared to allele A.	C			Is	Associated with	decreased	metabolism of		in people with	PK:no disease		A		0.5	0.058	0.064	0.01		0.255	0.061	SNP sin predominancia en alguna población	rs1057910-C
769170633	769170636	cohort	119		Longitudinal cohort of PsA patients, Toronto	Study Cohort					= 0.02	OR	2.99	1.2	7.55	Unknown	rs1232027		methotrexate	20472929	Efficacy	yes		Allele A is associated with increased response to methotrexate in people with Arthritis, Psoriatic as compared to allele G.	A			Is	Associated with	increased	response to		in people with	Disease:Arthritis, Psoriatic		G		0.562	0.232	0.213	0.45	0.281	0.506	0.242	SNP sin predominancia en alguna población	rs1232027-A
769170794	769170796		87		Low-dose methotrexate	Drug	0.56	T			= 0.0243	Unknown				East Asian	rs1051266	SLC19A1	methotrexate	19827168	Efficacy	yes	"Recent evidence suggests that patients with the RFC 80AA genotype responded to therapy better than those with the GG and GA genotypes. The results of univariate analysis in our study are consistent with these reports."	Allele T is associated with increased response to methotrexate in people with Arthritis, Rheumatoid as compared to allele C.	T			Is	Associated with	increased	response to		in people with	Disease:Rheumatoid arthritis		C		0.23	0.49	0.49	0.69	0.42	0.46	0.466667	SNP sin predominancia en alguna población	rs1051266-T
769171145	769171175	prospective	96		Undergoing hemodialysis treatment.	Disease					= 0.01	Unknown				European	rs1799945	HFE	erythropoietin	18025780	Dosage, Metabolism/PK	yes	Required dosage to maintain a fixed hemoglobin target level was lower. Required iron dose was also lower in carriers, but not significantly. Please note: carriers of this mutation or the rs1800562 C282Y mutation were pooled together. The alleles were not specified in the study, however G allele corresponds to the H63D (CAT>GAT) loss of function mutation.	Allele G is associated with decreased dose of epoetin alfa in people with hemodialysis treatment as compared to allele C.	G			Is	Associated with	decreased	dose of		in people with	Other:hemodialysis treatment		C		0.5	0.13	0.149	0.02	0.142	0.26	0.140333	SNP sin predominancia en alguna población	rs1799945-G
769171171	769171177	prospective	96		Undergoing hemodialysis treatment.	Study Cohort					= 0.01	Unknown				European	rs1800562	HFE	erythropoietin	18025780	Dosage, Metabolism/PK	yes	Required dosage to maintain a fixed hemoglobin target level was lower. Required iron dose was also lower in carriers, but not significantly. Please note: carriers of this mutation or the rs1799945 H63D mutation were pooled together. The alleles were not specified in the study, however the A allele corresponds to the C282Y (TGC>TAC) loss of function mutation.	Allele A is associated with decreased dose of epoetin alfa in people with hemodialysis treatment as compared to allele G.	A			Is	Associated with	decreased	dose of		in people with	Other:hemodialysis treatment		G			0.006	0.021	0.005	0.019	0.005	0.0153333	SNP sin predominancia en alguna población	rs1800562-A
769171199	769171206		174		RA	Disease					= 0.013	OR	1.78	1.13	2.81	European	rs1051266	SLC19A1	methotrexate	17325736	Efficacy	yes		Allele T is associated with increased response to methotrexate in people with Arthritis, Rheumatoid as compared to allele C.	T			Is	Associated with	increased	response to		in people with	Disease:Rheumatoid arthritis		C		0.23	0.49	0.49	0.69	0.42	0.46	0.466667	SNP sin predominancia en alguna población	rs1051266-T
769171231	769171234	cohort	83	15	DMARD: cases = responders, controls = non-responders	Drug	0.49	T	0.23	T	= 0.009	OR	3.1	1.3	7.7	European	rs1051266	SLC19A1	folic acid, hydroxychloroquine, methotrexate, sulfasalazine	18322994	Efficacy	yes		Allele T is associated with increased response to folic acid, hydroxychloroquine, methotrexate and sulfasalazine in people with Arthritis, Rheumatoid as compared to allele C.	T			Is	Associated with	increased	response to	and	in people with	Disease:Rheumatoid arthritis		C		0.23	0.49	0.49	0.69	0.42	0.46	0.466667	SNP sin predominancia en alguna población	rs1051266-T
769171236	769171241		83	15	DMARD: cases = responders, controls = non-responders	Drug	0.84	A	0.67		= 0.06	OR	2.6	1.1	6.1	European	rs1805087	MTR	folic acid, hydroxychloroquine, methotrexate, sulfasalazine	18322994	Efficacy	yes		Allele A is associated with increased response to folic acid, hydroxychloroquine, methotrexate and sulfasalazine in people with Arthritis, Rheumatoid as compared to allele G.	A			Is	Associated with	increased	response to	and	in people with	Disease:Rheumatoid arthritis		G		0.44	0.81	0.81	0.73	0.83	0.585	0.816667	SNP sin predominancia en alguna población	rs1805087-A
769171565	769171567	cohort	33		Japanese patients with rheumatoid arthritis	Study Cohort					= 0.02	Unknown				East Asian	rs396991	FCGR3A	infliximab	19005160	Efficacy	yes	Patient categorized as being a good or moderate responder (responder), or a non-responder according to EULAR response criteria at 22 weeks. The authors note that the distribution of genotypes was significantly different between patients with regard to response, however they do not give a direction to the association. Data from their table suggest that the AA genotype MAY be associated with respon…	Allele A is associated with increased response to infliximab in people with Arthritis, Rheumatoid as compared to allele C.	A			Is	Associated with	increased	response to		in people with	Disease:Rheumatoid arthritis		C		0.33	0.74				0.33	0.74	SNP sin predominancia en alguna población	rs396991-A
769171568	769171570	cohort	39			Unknown					= 0.055	Unknown				Unknown	rs396991	FCGR3A	cetuximab	17704420	Efficacy	yes	The F allele carriers was also associated with longer progression-free survival.	Allele A is associated with increased response to cetuximab in people with Colorectal Neoplasms as compared to allele C.	A			Is	Associated with	increased	response to		in people with	Disease:Colorectal Neoplasms		C		0.33	0.74				0.33	0.74	SNP sin predominancia en alguna población	rs396991-A
769173638	769173641		281		RA	Disease					= 0.02	OR	1.66	1.01	2.75	Central/South Asian	rs244076	ADA	methotrexate	19902562	Efficacy	yes	although not significant after Bonferroni correction.	Allele C is associated with decreased response to methotrexate in people with Arthritis, Rheumatoid.	C			Is	Associated with	decreased	response to		in people with	Disease:Rheumatoid arthritis				0.609	0.285	0.165	0.46	0.223	0.5345	0.224333	SNP sin predominancia en alguna población	rs244076-C
769173642	769173645		281		RA	Disease					= 0.04	OR	1.55	1.01	2.37	Central/South Asian	rs5751876	ADORA2A	methotrexate	19902562	Efficacy	yes	although not significant after Bonferroni correction.	Allele T is associated with decreased response to methotrexate in people with Arthritis, Rheumatoid.	T			Is	Associated with	decreased	response to		in people with	Disease:Rheumatoid arthritis				0.31	0.44	0.47	0.62		0.465	0.455	SNP sin predominancia en alguna población	rs5751876-T
769173649	769173651	cohort	205		BeSt (Behandelstrategieën voor Reumatoide Artritis [Treatment Strategies for Rheumatoid Arthritis]) study, MTX alone	Study Cohort					< 0.05	Unknown	2.1	1	4.5	Multiple groups, 93% Caucasian (n = 191), 2.4% Asian (n = 5), 1.0% African (n = 2), and 3.4% other (n = 3 Hindustani, 3 Surinamese, 1 Israeli). All results remained similar when performed with and without inclusion of non-Caucasian patients.	rs17602729	AMPD1	folic acid, methotrexate	16947783	Efficacy	yes		Allele A is associated with increased response to folic acid and methotrexate in people with Arthritis, Rheumatoid as compared to allele G.	A			Is	Associated with	increased	response to	and	in people with	Disease:Rheumatoid arthritis		G		0.5	0.082	0.112	0.015	0.086	0.2575	0.0933333	SNP sin predominancia en alguna población	rs17602729-A
769174083	769174113	cohort	646		Asthma patients	Disease	0.14	A			= 0.021	Unknown				Latino	rs881152	DUSP1	salbutamol	20673984	Efficacy	yes	Subjects were taking inhaled corticosteroids. When the Puerto-Rican and Mexican American cohorts from the GALA study were analyzed separately, the same association was significant in the Puerto-Ricans but not in the Mexican Americans.	Allele G is associated with increased response to salbutamol in people with Asthma as compared to allele A.	G			Is	Associated with	increased	response to		in people with	Disease:Asthma		A		0.42	0.97	0.85			0.42	0.91	SNP predominantes en ancestría europea	rs881152-G
769218940	769218943	cohort, prospective	204		Individuals diagnosed with Major Depressive Disorder (MDD), all treated with Paraoxetine.	Study Cohort	0.35	C			= 0.0028	Unknown				East Asian	rs762551	CYP1A2	paroxetine	21121774	Metabolism/PK	yes	Dose required at week 4 of treatment.	Allele A is associated with increased dose of paroxetine in people with Depressive Disorder, Major as compared to allele C.	A			Is	Associated with	increased	dose of		in people with	Disease:Major Depressive Disorder		C		0.683	0.732	0.734	0.56	0.752	0.6215	0.739333	SNP sin predominancia en alguna población	rs762551-A
769245456	769245458	cohort	118		coronary artery disease; stenting	Disease					= 0.01	Unknown				Multiple groups, 59 White; 55 African American	rs4244285	CYP2C19	aspirin, clopidogrel	21392617	Efficacy	yes	These patients had coronary arterial stenting. The comparison was that ADP-induced ex vivo platelet aggregation was higher in (AA + AG) compared to GG, but the template does not accommodate this. *2 SNP. [stat_test: chi-square]	Allele A is associated with decreased response to aspirin and clopidogrel in people with Coronary Artery Disease as compared to allele G.	A			Is	Associated with	decreased	response to	and	in people with	Disease:Coronary Artery Disease		G		0.5	0.087	0.106	0.14	0.114	0.32	0.102333	SNP sin predominancia en alguna población	rs4244285-A
769245465	769245467	cohort	71		Coronary Artery Disease; Coronary Arterial Stenting. p is for 5 microMolar ADP. p for 20 microMolar ADP is 0.013	Disease					= 0.015	Unknown				Multiple groups	rs4244285	CYP2C19	aspirin, clopidogrel	21392617	Efficacy	yes	The prevalence of High Platelet Reactivity (HPR) was higher in (AA + AG) compared to GG, but the template doesn't accommodate this. *2 SNP. [stat_test: chi-square]	Allele A is associated with decreased response to aspirin and clopidogrel in people with Coronary Artery Disease as compared to allele G.	A			Is	Associated with	decreased	response to	and	in people with	Disease:Coronary Artery Disease		G		0.5	0.087	0.106	0.14	0.114	0.32	0.102333	SNP sin predominancia en alguna población	rs4244285-A
769245468	769245471	cohort	49		Coronary Artery Disease; Coronary Arterial Stenting	Disease					= 0.016	Unknown				Multiple groups	rs12248560	CYP2C19	aspirin, clopidogrel	21392617		yes	For 20 microMolar ADP-induced platelet aggregation, the prevalence of High Platelet Reactivity (HPR) was lower in (TT +TC) vs CC, but the template doesn't accommodate this. *17 SNP. For 5 microMolar ADP-induced platelet aggregation, the association was NOT significant ( p = 0.32). [stat_test: chi-square]	Allele T is associated with increased response to aspirin and clopidogrel in people with Coronary Artery Disease as compared to allele C.	T			Is	Associated with	increased	response to	and	in people with	Disease:Coronary Artery Disease		C		0.5	0.092	0.128	0.16	0.077	0.33	0.099	SNP sin predominancia en alguna población	rs12248560-T
769245704	769245707	cohort	330			Unknown	0.47	G			= 0.0041	Unknown				African American/Afro-Caribbean	rs61162043	VKORC1	warfarin	21270790	Dosage	yes		Allele G is associated with increased dose of warfarin.	G			Is	Associated with	increased	dose of							0.667	0.367	0.574			0.667	0.4705	SNP sin predominancia en alguna población	rs61162043-G
769245708	769245711	cohort	330			Unknown	0.23	T			= 0.035	Unknown				African American/Afro-Caribbean	rs7089580	CYP2C9	warfarin	21270790	Dosage	yes		Allele T is associated with increased dose of warfarin.	T			Is	Associated with	increased	dose of							0.5	0.125	0.128			0.5	0.1265	SNP sin predominancia en alguna población	rs7089580-T
769248374	769248377	cohort, GWAS	172		Hepatitis C patients.	Unknown	0.15	G			= 0.0	OR	20.3	9.3	76.5	East Asian	rs12980275	IFNL3	peginterferon alfa-2a, peginterferon alfa-2b, ribavirin	19749757	Efficacy	yes	This variant is associated with null virological response (NVR) and sustained virologic response (SVR) in a genome-wide association study of Janapese patients with hepatitis C virus infection treated with PEG-INF-alpha plus ribavirin in this discovery sample. Two SNPs near the gene IL28B on chromosome 19 to be strongly associated with NVR (rs12980275, P = 1.93 × 10-13, and rs8099917, 3.11 × 10-15…	Allele A is associated with increased response to peginterferon alfa-2a, peginterferon alfa-2b and ribavirin in people with Hepatitis C as compared to allele G.	A			Is	Associated with	increased	response to	and	in people with	Disease:Hepatitis C virus infection		G		0.2	0.9	0.57	0.49	0.55	0.345	0.673333	SNP sin predominancia en alguna población	rs12980275-A
769248378	769248381	cohort, GWAS	172		Hepatitis C patients.	Unknown	0.12	G			= 0.0	OR	30	11.2	80.5	East Asian	rs8099917	IFNL3	peginterferon alfa-2a, peginterferon alfa-2b, ribavirin	19749757	Efficacy	yes	This variant is associated with null virological response (NVR) and sustained virologic response (SVR) in a genome-wide association study of Janapese patients with hepatitis C virus infection treated with PEG-INF-alpha plus ribavirin in this discovery sample. Two SNPs near the gene IL28B on chromosome 19 to be strongly associated with NVR (rs12980275, P = 1.93 × 10-13, and rs8099917, 3.11 × 10-15…	Allele T is associated with increased response to peginterferon alfa-2a, peginterferon alfa-2b and ribavirin in people with Hepatitis C as compared to allele G.	T			Is	Associated with	increased	response to	and	in people with	Disease:Hepatitis C virus infection		G		0.5	0.83	0.73	0.91	0.68	0.705	0.746667	SNP sin predominancia en alguna población	rs8099917-T
769249016	769249059	cohort	109		Healthy volunteers	Disease					= 0.001	Unknown				Sub-Saharan African	rs28371686	CYP2C9	phenytoin	16220110	Other, Metabolism/PK	yes	as measured by urinary excretion of its major metabolite, S-enantiomer of 5-(4-hydroxyphenyl)-5-phenylhydantoin (p-HPPH). Statistics given for trend with various PM allele vs *1*1. [stat_test: ANOVA]	Allele G is associated with decreased metabolism of phenytoin in people with no disease as compared to genotype CC.	G			Is	Associated with	decreased	metabolism of		in people with	Other:no disease		CC		0.5	0.002	0	0.005		0.2525	0.001	SNP sin predominancia en alguna población	rs28371686-G
769249039	769249068	cohort	109		Healthy volunteers	Disease					= 0.001	Unknown				Sub-Saharan African	rs7900194	CYP2C9	phenytoin	16220110	Other, Metabolism/PK	yes	as measured by urinary excretion of its major metabolite, S-enantiomer of 5-(4-hydroxyphenyl)-5-phenylhydantoin (p-HPPH). Statistics given for trend with various PM allele vs *1*1. [stat_test: ANOVA]	Allele A is associated with decreased metabolism of phenytoin in people with no disease as compared to genotype GG.	A			Is	Associated with	decreased	metabolism of		in people with	Other:no disease		GG		0.5	0.005	0	0.045		0.2725	0.0025	SNP sin predominancia en alguna población	rs7900194-A
769249040	769249055	cohort	109		Healthy volunteers	Disease					= 0.001	Unknown				Sub-Saharan African	rs28371685	CYP2C9	phenytoin	16220110	Other, Metabolism/PK	yes	as measured by urinary excretion of its major metabolite, S-enantiomer of 5-(4-hydroxyphenyl)-5-phenylhydantoin (p-HPPH). Statistics given for trend with various PM allele vs *1*1. [stat_test: ANOVA]	Allele T is associated with increased metabolism of phenytoin in people with no disease as compared to genotype CC.	T			Is	Associated with	increased	metabolism of		in people with	PK:no disease		CC		0.5	0.002	0	0.025	0.002	0.2625	0.00133333	SNP sin predominancia en alguna población	rs28371685-T
769250992	769251009	case/control	1671		Patients with chronic hepatitis C. European-Americans: 871; African-Americans: 191; Hispanics: 75.	Study Cohort					= 1.37E-28	OR	3.1	2.1	4.7	Multiple groups, European-Americans: 871; African-Americans: 191; Hispanics: 75.	rs8103142	IFNL3	peginterferon alfa-2a, peginterferon alfa-2b, ribavirin	19684573	Efficacy	yes	The rs8103142 SNP was found to be highly associated (r-squared > 0.85) with rs12979860.	Allele T is associated with increased response to peginterferon alfa-2a, peginterferon alfa-2b and ribavirin in people with Hepatitis C as compared to allele C.	T			Is	Associated with	increased	response to	and	in people with	Disease:Hepatitis C virus infection		C		0.22	0.57	0.57	0.3		0.26	0.57	SNP sin predominancia en alguna población	rs8103142-T
769250998	769251007	case/control	1671		Patients with chronic hepatitis C. European-Americans: 871; African-Americans: 191; Hispanics: 75.	Study Cohort					= 1.37E-28	OR	3.1	2.1	4.7	Multiple groups, European-Americans: 871; African-Americans: 191; Hispanics: 75.	rs28416813	IFNL3	peginterferon alfa-2a, peginterferon alfa-2b, ribavirin	19684573	Efficacy	yes	The rs28416813 SNP was found to be highly associated (r-squared > 0.85) with rs12979860.	Allele G is associated with increased response to peginterferon alfa-2a, peginterferon alfa-2b and ribavirin in people with Hepatitis C as compared to allele C.	G			Is	Associated with	increased	response to	and	in people with	Disease:Hepatitis C virus infection		C		0.781	0.414	0.415	0.606		0.6935	0.4145	SNP sin predominancia en alguna población	rs28416813-G
769259039	769259061	cohort	16		HIV/TB-coinfected Ghanaian patients	Study Cohort					= 0.004	Unknown				Sub-Saharan African	rs28365062	UGT2B7	zidovudine	19628728	Metabolism/PK	yes	The G allele carriers had 57% lower mean AUC (P = .029, unpaired t test), 196% higher mean CL/F (P = .004, unpaired t test; Figure 3B), and 67% shorter mean elimination half-life (P = .030, unpaired t test) compared with A allele carriers	Allele G is associated with increased metabolism of zidovudine as compared to allele A.	G			Is	Associated with	increased	metabolism of					A		0.333	0.249	0.245			0.333	0.247	SNP sin predominancia en alguna población	rs28365062-G
769261461	769261464	clinical trial	169		FFCD 2000-05 randomized phase III trial , second line FOLFOX	Study Cohort					= 0.02	Unknown				Unknown	rs3212948	ERCC1	fluorouracil, leucovorin, oxaliplatin	20385995	Efficacy	yes	NB: Improved overall response rate is reported as for the G allele, gene is on the negative strand so given here as the C allele.	Allele C is associated with increased response to fluorouracil, leucovorin and oxaliplatin in people with Colorectal Neoplasms as compared to genotype GG.	C			Is	Associated with	increased	response to	and	in people with	Disease:Colorectal Neoplasms		GG		0.882	0.551	0.495	0.865	0.43	0.8735	0.492	SNP predominantes en ancestría africana	rs3212948-C
769277894	769277898	cohort	147			Unknown	39.8	A			= 0.002	Unknown				European	rs9934438	VKORC1	warfarin	15358623	Dosage	yes		Allele A is associated with decreased dose of warfarin as compared to allele G.	A			Is	Associated with	decreased	dose of					G		0.5	0.405	0.42	0.145	0.377	0.3225	0.400667	SNP sin predominancia en alguna población	rs9934438-A
827566611	827566617	cohort	348		Monozygotic and dizygotic twins from the Alcohol Challenge Twin Study (ACTS). Genotypes were also collected from non-twin siblings and parents, but phenotypes were collected from the twins so the association is based on that number.	Study Cohort	0.664	G	0.336	C	= 3.0E-4	Unknown				European	rs1154461	ADH7	ethanol	19193628	Toxicity, Metabolism/PK	yes	The authors did not report p-value correction for multiple hypotheses (103 snps tested). Though they report multiple snps are significantly associated with alcohol metabolism (early or late) tested on blood or breath alcohol concentrations, this is the only snp that survived Bonferroni correction for multiple hypotheses (<0.00049). It was only significant for blood early metabolism, and the autho…	Allele C is associated with metabolism of ethanol.	C			Is	Associated with		metabolism of							0.44	0.9	0.66		0.75	0.44	0.77	SNP predominantes en ancestría europea	rs1154461-C
827566623	827566629	cohort	348		Monozygotic and dizygotic twins from the Alcohol Challenge Twin Study (ACTS). Genotypes were also collected from non-twin siblings and parents, but phenotypes were collected from the twins so the association is based on that number.	Study Cohort	0.772	T	0.228	C	= 0.033	Unknown				European	rs1229976	ADH1A	ethanol	19193628	Toxicity, Metabolism/PK	yes	The authors did not report p-value correction for multiple hypotheses (103 snps tested). Though they report multiple snps are significantly associated with alcohol metabolism (early or late) tested on blood or breath alcohol concentrations, this snp is NOT significant after Bonferroni correction (<0.00049). Also, the authors did not state which alleles are associated with increased or decreased m…	Allele C is associated with metabolism of ethanol.	C			Is	Associated with		metabolism of							0.06	0.25	0.16	0.06	0.18	0.06	0.196667	SNP sin predominancia en alguna población	rs1229976-C
827566630	827566636	cohort	348		Monozygotic and dizygotic twins from the Alcohol Challenge Twin Study (ACTS). Genotypes were also collected from non-twin siblings and parents, but phenotypes were collected from the twins so the association is based on that number.	Study Cohort	0.925	A	0.075	C	= 0.048	Unknown				European	rs2276332	ADH1A	ethanol	19193628	Toxicity, Metabolism/PK	yes	The authors did not report p-value correction for multiple hypotheses (103 snps tested). Though they report multiple snps are significantly associated with alcohol metabolism (early or late) tested on blood or breath alcohol concentrations, this snp is NOT significant after Bonferroni correction (<0.00049). Also, the authors did not state which alleles are associated with increased or decreased m…	Allele C is associated with metabolism of ethanol.	C			Is	Associated with		metabolism of							0.5	0.262	0.287	0.09	0.275	0.295	0.274667	SNP sin predominancia en alguna población	rs2276332-C
827566637	827566646	cohort	348	0	Monozygotic and dizygotic twins from the Alcohol Challenge Twin Study (ACTS). Genotypes were also collected from non-twin siblings and parents, but phenotypes were collected from the twins so the association is based on that number.	Study Cohort	0.773	G	0.227	C	= 0.041	Unknown				European	rs1229967	ADH1A	ethanol	19193628	Toxicity, Metabolism/PK	yes	The authors did not report p-value correction for multiple hypotheses (103 snps tested). Though they report multiple snps are significantly associated with alcohol metabolism (early or late) tested on blood or breath alcohol concentrations, this snp is NOT significant after Bonferroni correction (<0.00049). Also, the authors did not state which alleles are associated with increased or decreased m…	Allele C is associated with metabolism of ethanol.	C			Is	Associated with		metabolism of							0.941	0.675				0.941	0.675	SNP sin predominancia en alguna población	rs1229967-C
827566652	827566659	cohort	348	0	Monozygotic and dizygotic twins from the Alcohol Challenge Twin Study (ACTS). Genotypes were also collected from non-twin siblings and parents, but phenotypes were collected from the twins so the association is based on that number.	Study Cohort	0.226	A	0.774	G		Unknown	0.041			European	rs931635	ADH1A	ethanol	19193628	Toxicity, Metabolism/PK	yes	The authors did not report p-value correction for multiple hypotheses (103 snps tested). Though they report multiple snps are significantly associated with alcohol metabolism (early or late) tested on blood or breath alcohol concentrations, this snp is NOT significant after Bonferroni correction (<0.00049). Also, the authors did not state which alleles are associated with increased or decreased m…	Allele A is associated with metabolism of ethanol.	A			Is	Associated with		metabolism of							0.06	0.11	0.16	0.06	0.19	0.06	0.153333	SNP sin predominancia en alguna población	rs931635-A
827566660	827566666	cohort	348	0	Monozygotic and dizygotic twins from the Alcohol Challenge Twin Study (ACTS). Genotypes were also collected from non-twin siblings and parents, but phenotypes were collected from the twins so the association is based on that number.	Study Cohort	0.067	C	0.933	T	= 0.029	Unknown				European	rs17033	ADH1B	ethanol	19193628	Toxicity, Metabolism/PK	yes	The authors did not report p-value correction for multiple hypotheses (103 snps tested). Though they report multiple snps are significantly associated with alcohol metabolism (early or late) tested on blood or breath alcohol concentrations, this snp is NOT significant after Bonferroni correction (<0.00049). Also, the authors did not state which alleles are associated with increased or decreased m…	Allele C is associated with metabolism of ethanol.	C			Is	Associated with		metabolism of							0.5	0.255	0.287	0.1	0.271	0.3	0.271	SNP sin predominancia en alguna población	rs17033-C
827566667	827566673	cohort	348	0	Monozygotic and dizygotic twins from the Alcohol Challenge Twin Study (ACTS). Genotypes were also collected from non-twin siblings and parents, but phenotypes were collected from the twins so the association is based on that number.	Study Cohort	0.027	G	0.973	A	= 0.003	Unknown				European	rs1229985	ADH1B	ethanol	19193628	Toxicity, Metabolism/PK	yes	The authors did not report p-value correction for multiple hypotheses (103 snps tested). Though they report multiple snps are significantly associated with alcohol metabolism (early or late) tested on blood or breath alcohol concentrations, this snp is NOT significant after Bonferroni correction (<0.00049). Also, the authors did not state which alleles are associated with increased or decreased m…	Allele G is associated with metabolism of ethanol.	G			Is	Associated with		metabolism of							0.5	0.042	0.016		0.03	0.5	0.0293333	SNP sin predominancia en alguna población	rs1229985-G
827566674	827566680	cohort	348	0	Monozygotic and dizygotic twins from the Alcohol Challenge Twin Study (ACTS). Genotypes were also collected from non-twin siblings and parents, but phenotypes were collected from the twins so the association is based on that number.	Study Cohort	0.041	A	0.959	C	= 0.015	Unknown				European	rs2018417	ADH1B	ethanol	19193628	Toxicity, Metabolism/PK	yes	The authors did not report p-value correction for multiple hypotheses (103 snps tested). Though they report multiple snps are significantly associated with alcohol metabolism (early or late) tested on blood or breath alcohol concentrations, this snp is NOT significant after Bonferroni correction (<0.00049). Also, the authors did not state which alleles are associated with increased or decreased m…	Allele A is associated with metabolism of ethanol.	A			Is	Associated with		metabolism of								0.016	0.005				0.0105	SNP sin predominancia en alguna población	rs2018417-A
827566681	827566687	cohort	348		Monozygotic and dizygotic twins from the Alcohol Challenge Twin Study (ACTS). Genotypes were also collected from non-twin siblings and parents, but phenotypes were collected from the twins so the association is based on that number.	Study Cohort	0.453	C	0.547	T	= 0.003	Unknown				European	rs1662060	ADH1C	ethanol	19193628	Toxicity, Metabolism/PK	yes	The authors did not report p-value correction for multiple hypotheses (103 snps tested). Though they report multiple snps are significantly associated with alcohol metabolism (early or late) tested on blood or breath alcohol concentrations, this snp is NOT significant after Bonferroni correction (<0.00049). Also, the authors did not state which alleles are associated with increased or decreased m…	Allele C is associated with metabolism of ethanol.	C			Is	Associated with		metabolism of							0.562	0.214	0.245			0.562	0.2295	SNP sin predominancia en alguna población	rs1662060-C
827566688	827566694	cohort	348		Monozygotic and dizygotic twins from the Alcohol Challenge Twin Study (ACTS). Genotypes were also collected from non-twin siblings and parents, but phenotypes were collected from the twins so the association is based on that number.	Study Cohort	0.052	A	0.948		= 0.015	Unknown				European	rs283411	ADH1C	ethanol	19193628	Toxicity, Metabolism/PK	yes	The authors did not report p-value correction for multiple hypotheses (103 snps tested). Though they report multiple snps are significantly associated with alcohol metabolism (early or late) tested on blood or breath alcohol concentrations, this snp is NOT significant after Bonferroni correction (<0.00049). Also, the authors did not state which alleles are associated with increased or decreased m…	Allele A is associated with metabolism of ethanol.	A			Is	Associated with		metabolism of							0.5	0.034	0.032	0.065	0.053	0.2825	0.0396667	SNP sin predominancia en alguna población	rs283411-A
827566695	827566701	cohort	348	0	Monozygotic and dizygotic twins from the Alcohol Challenge Twin Study (ACTS). Genotypes were also collected from non-twin siblings and parents, but phenotypes were collected from the twins so the association is based on that number.	Study Cohort	0.052	A	0.948	G	= 0.015	Unknown				European	rs283416	ADH1C	ethanol	19193628	Toxicity, Metabolism/PK	yes	The authors did not report p-value correction for multiple hypotheses (103 snps tested). Though they report multiple snps are significantly associated with alcohol metabolism (early or late) tested on blood or breath alcohol concentrations, this snp is NOT significant after Bonferroni correction (<0.00049). Also, the authors did not state which alleles are associated with increased or decreased m…	Allele A is associated with metabolism of ethanol.	A			Is	Associated with		metabolism of							0.5		0.032		0.053	0.5	0.0425	SNP sin predominancia en alguna población	rs283416-A
827567282	827567312	cohort	201			Unknown					< 1.0E-4	Unknown				European	rs9923231	VKORC1	warfarin	15883587	Dosage	yes		Allele T is associated with decreased dose of warfarin as compared to allele C.	T			Is	Associated with	decreased	dose of					C		0.5	0.326	0.42	0.145	0.377	0.3225	0.374333	SNP sin predominancia en alguna población	rs9923231-T
827567313	827567320	cohort	201			Unknown					< 1.0E-4	Unknown				European	rs9934438	VKORC1	warfarin	15883587	Dosage	yes		Allele A is associated with decreased dose of warfarin as compared to allele G.	A			Is	Associated with	decreased	dose of					G		0.5	0.405	0.42	0.145	0.377	0.3225	0.400667	SNP sin predominancia en alguna población	rs9934438-A
827567321	827567328	cohort	201			Unknown					< 1.0E-4	Unknown				European	rs2359612	VKORC1	warfarin	15883587	Dosage	yes		Allele A is associated with decreased dose of warfarin as compared to allele G.	A			Is	Associated with	decreased	dose of					G		0.18	0.47	0.44	0.23	0.41	0.205	0.44	SNP sin predominancia en alguna población	rs2359612-A
827567329	827567336	cohort	201			Unknown					< 1.0E-4	Unknown				European	rs7294	VKORC1	warfarin	15883587	Dosage	yes		Allele C is associated with decreased dose of warfarin as compared to allele T.	C			Is	Associated with	decreased	dose of					T		0.29	0.67	0.64	0.57	0.65	0.43	0.653333	SNP sin predominancia en alguna población	rs7294-C
827567338	827567351	cohort	201			Unknown					= 0.0221	Unknown				European	rs11150606	VKORC1	warfarin	15883587	Dosage	yes		Allele C is associated with decreased dose of warfarin as compared to allele T.	C			Is	Associated with	decreased	dose of					T		0.5	0.173	0.165	0.05	0.154	0.275	0.164	SNP sin predominancia en alguna población	rs11150606-C
827601694	827601887	cohort	1015		The mean age was 65 (range of 18-93); 83% were Caucasian, and 64% were male.	Study Cohort					< 1.0E-4	Unknown				Multiple groups	rs9923231	VKORC1	warfarin	18305455	Dosage	yes	This variant was associated with a 28% reduction per allele (95% confidence interval 25-30%) in the therapeutic warfarin dose.	Allele T is associated with decreased dose of warfarin as compared to allele C.	T			Is	Associated with	decreased	dose of					C		0.5	0.326	0.42	0.145	0.377	0.3225	0.374333	SNP sin predominancia en alguna población	rs9923231-T
827602050	827602193	cohort	1015			Unknown					< 1.0E-4	Unknown				Multiple groups	rs1799853	CYP2C9	warfarin	18305455	Dosage	yes	CYP2C9*2 is associated with a 19% decrement in the warfarin dose per; allele.	Allele T is associated with decreased dose of warfarin as compared to allele C.	T			Is	Associated with	decreased	dose of					C			0.089	0.122	0.035		0.035	0.1055	SNP sin predominancia en alguna población	rs1799853-T
827602228	827602363	cohort	1015			Unknown					< 1.0E-4	Unknown				Multiple groups	rs1057910	CYP2C9	warfarin	18305455	Dosage	yes	CYP2C9*3 was associated with a; 33% (95% confidence interval 29¿37%) decrement in warfarin dose per allele.	Allele C is associated with decreased dose of warfarin as compared to allele A.	C			Is	Associated with	decreased	dose of					A		0.5	0.058	0.064	0.01		0.255	0.061	SNP sin predominancia en alguna población	rs1057910-C
827603022	827603285	cohort	186			Unknown					< 0.001	Unknown				Unknown	rs9923231	VKORC1	warfarin	15930419	Dosage	yes	This variant is part of the a low-dose haplotype group (A).	Allele T is associated with decreased dose of warfarin.	T			Is	Associated with	decreased	dose of							0.5	0.326	0.42	0.145	0.377	0.3225	0.374333	SNP sin predominancia en alguna población	rs9923231-T
827641630	827641635	retrospective	36		patients with bulky (>=4 cm) stage IB or IIA cervical carcinoma who received platinum-based combination NAC	Study Cohort					= 0.032	Unknown				East Asian	rs12659	SLC19A1	carboplatin, cisplatin, fluorouracil	16875718	Efficacy	yes		Allele A is associated with decreased response to carboplatin, cisplatin and fluorouracil in people with Uterine Cervical Neoplasms as compared to allele G.	A			Is	Associated with	decreased	response to	and	in people with	Disease:Uterine Cervical Neoplasm		G		0.19	0.45	0.48		0.39	0.19	0.44	SNP sin predominancia en alguna población	rs12659-A
827641636	827641642	retrospective	36		patients with bulky (>=4 cm) stage IB or IIA cervical carcinoma who received platinum-based combination NAC	Study Cohort					= 0.015	Unknown				East Asian	rs25487	XRCC1	carboplatin, cisplatin, fluorouracil	16875718	Efficacy	yes		Allele T is associated with decreased response to carboplatin, cisplatin and fluorouracil in people with Uterine Cervical Neoplasms as compared to allele C.	T			Is	Associated with	decreased	response to	and	in people with	Disease:Uterine Cervical Neoplasm		C		0.11	0.33	0.37	0.13		0.12	0.35	SNP sin predominancia en alguna población	rs25487-T
827641885	827641893	GWAS	1053			Unknown					= 1.6E-5	Unknown				Unknown	rs2108622	CYP4F2	warfarin	19300499	Dosage	yes		Allele T is associated with increased dose of warfarin as compared to allele C.	T			Is	Associated with	increased	dose of					C		0.556	0.275	0.282	0.075	0.278	0.3155	0.278333	SNP sin predominancia en alguna población	rs2108622-T
827641894	827641902	GWAS	1053			Unknown					= 8.8E-13	Unknown				Unknown	rs1799853	CYP2C9	warfarin	19300499	Dosage, Metabolism/PK	yes		Allele T is associated with decreased dose of warfarin as compared to allele C.	T			Is	Associated with	decreased	dose of					C			0.089	0.122	0.035		0.035	0.1055	SNP sin predominancia en alguna población	rs1799853-T
827641903	827641911	GWAS	1053			Unknown					= 4.5E-17	Unknown				Unknown	rs1057910	CYP2C9	warfarin	19300499	Dosage, Metabolism/PK	yes		Allele C is associated with decreased dose of warfarin as compared to allele A.	C			Is	Associated with	decreased	dose of					A		0.5	0.058	0.064	0.01		0.255	0.061	SNP sin predominancia en alguna población	rs1057910-C
827641986	827641994	case/control	301		92 Japanese and 209 Korean individuals with allele frequencies of 21.3 and 22.3%, respectively.	Unknown	0.22	C			< 0.005	Unknown				East Asian	rs28399433	CYP2A6	nicotine	12844137	Metabolism/PK	yes	Case-control study of enzymatic activity of mutation for synonymous SNP that disrupts the TATA box (rs28399433) (-48T>G) (CYP2A6*9A, when combined with -1013A>G and CYP2A6*9B when combined with -1680A>G, -1301A>C, -1289G>A, -1013A>G, 1620T>C, 1836G>T, 6354T>C, and 6692C>G) that is associated with significantly lower cotinine/nicotine ratio.	Allele C is associated with decreased metabolism of nicotine.	C			Is	Associated with	decreased	metabolism of							0.167	0.123	0.101	0.11	0.102	0.1385	0.108667	SNP sin predominancia en alguna población	rs28399433-C
827642007	981240248	case/control	345		45 African-American, 156 Caucasian, 47 Chinese, 50 Japanese and 47 Korean individuals.	Unknown	0.06	C			= 0.043	Unknown				Multiple groups, African-American, Caucasian, Chinese and Korean	rs28399433	CYP2A6	coumarin	16041240	Metabolism/PK	yes	In this case-control in vitro study of (rs28399433) (-48T>C) (CYP2A6*9A, when combined with -1013A>G and CYP2A6*9B when combined with -1680A>G, -1301A>C, -1289G>A, -1013A>G, 1620T>C, 1836G>T, 6354T>C, and 6692C>G), which disrupts the TATA box and is associated with decreased CYP2A6 expression and coumarin activity in hepatocytes.	Allele C is associated with decreased metabolism of coumarin.	C			Is	Associated with	decreased	metabolism of							0.167	0.123	0.101	0.11	0.102	0.1385	0.108667	SNP sin predominancia en alguna población	rs28399433-C
827647045	827648879	cohort	93			Unknown					< 1.0E-4	Unknown				European	rs9934438	VKORC1	warfarin	16611750	Dosage	yes		Allele A is associated with decreased dose of warfarin as compared to allele G.	A			Is	Associated with	decreased	dose of					G		0.5	0.405	0.42	0.145	0.377	0.3225	0.400667	SNP sin predominancia en alguna población	rs9934438-A
827649690	827650842	cohort	93			Unknown					= 0.021	Unknown				European	rs7294	PRSS53, VKORC1	warfarin	16611750	Dosage	yes		Allele T is associated with increased dose of warfarin as compared to allele C.	T			Is	Associated with	increased	dose of					C		0.708	0.328	0.356	0.425	0.347	0.5665	0.343667	SNP sin predominancia en alguna población	rs7294-T
827661232	827661812	cohort	828			Unknown					= 5.1E-11	Unknown				East Asian	rs9934438	VKORC1	warfarin	16432637	Dosage	yes		Allele A is associated with decreased dose of warfarin as compared to allele G.	A			Is	Associated with	decreased	dose of					G		0.5	0.405	0.42	0.145	0.377	0.3225	0.400667	SNP sin predominancia en alguna población	rs9934438-A
827690011	827690018	clinical trial	512			Unknown					= 0.02	Unknown				European	rs1540339	VDR	selective beta-2-adrenoreceptor agonists	15282200	Efficacy	yes		Allele C is associated with decreased response to selective beta-2-adrenoreceptor agonists in people with Asthma as compared to allele T.	C			Is	Associated with	decreased	response to		in people with	Disease:Asthma		T		0.5	0.79	0.69	0.71	0.62	0.605	0.7	SNP sin predominancia en alguna población	rs1540339-C
827690019	827690026	clinical trial	512			Unknown					= 0.009	Unknown				European	rs2239179	VDR	selective beta-2-adrenoreceptor agonists	15282200	Efficacy	yes		Allele C is associated with decreased response to selective beta-2-adrenoreceptor agonists in people with Asthma as compared to allele T.	C			Is	Associated with	decreased	response to		in people with	Disease:Asthma		T		0.579	0.139	0.356		0.311	0.579	0.268667	SNP sin predominancia en alguna población	rs2239179-C
827704813	827704822	cohort	8	0	GSTT1 non-null subgroup: cases = responders, controls = non-responders	Study Cohort					= 0.0209	Unknown				Multiple groups, Brazil: white and black	rs1695	GSTP1	cyclophosphamide, epirubicin, fluorouracil	20568049	Efficacy	yes	Significant when combined with the GSTT1 non-null genotype.	Allele A is associated with increased response to cyclophosphamide, epirubicin and fluorouracil in women with Breast Neoplasms as compared to allele G.	A			Is	Associated with	increased	response to	and	in women with	Disease:Breast Neoplasms		G		0.41	0.6	0.64	0.52	0.58	0.465	0.606667	SNP sin predominancia en alguna población	rs1695-A
827777175	827777183	clinical trial	312		GENDEP (study size represents both treatment arms, details of how many in the nortriptyline group were not given)	Study Cohort	0.05	C			= 0.0082	Unknown				European	rs17060812	SLC39A14	nortriptyline	20970119	Efficacy	yes		Allele C is associated with increased response to nortriptyline in people with Depression as compared to allele T.	C			Is	Associated with	increased	response to		in people with	Disease:Depression		T		0.35		0.93	0.66	0.93	0.505	0.93	SNP sin predominancia en alguna población	rs17060812-C
827784603	827784608	cohort	50		GAGIns haplotype vs reference	Study Cohort					= 0.025	Unknown				East Asian	rs4149118	SLCO1B3	docetaxel	21995462	Other, Metabolism/PK	yes	Significance as part of a haplotype with rs7311358, rs11045585 and rs3834935.	Allele G is associated with decreased clearance of docetaxel in people with Nasopharyngeal Neoplasms.	G			Is	Associated with	decreased	clearance of		in people with	Disease:Nasopharyngeal Neoplasms				0.43	0.43	0.35	0.72		0.575	0.39	SNP sin predominancia en alguna población	rs4149118-G
827784609	827784615	cohort	50		GAGIns haplotype vs reference	Study Cohort					= 0.025	Unknown				East Asian	rs7311358	SLCO1B3	docetaxel	21995462	Other, Metabolism/PK	yes	Significance as part of a haplotype with rs4149118, rs11045585 and rs3834935.	Allele A is associated with decreased clearance of docetaxel in people with Nasopharyngeal Neoplasms.	A			Is	Associated with	decreased	clearance of		in people with	Disease:Nasopharyngeal Neoplasms				0.7	0.813	0.888		0.83	0.7	0.843667	SNP sin predominancia en alguna población	rs7311358-A
827784616	827784621	cohort	50		GAGIns haplotype vs reference	Study Cohort					= 0.025	Unknown				East Asian	rs11045585	SLCO1B3	docetaxel	21995462	Other, Metabolism/PK	yes	Significance as part of a haplotype with rs4149118, rs7311358 and rs3834935.	Allele G is associated with decreased clearance of docetaxel in people with Nasopharyngeal Neoplasms.	G			Is	Associated with	decreased	clearance of		in people with	Disease:Nasopharyngeal Neoplasms				0.6	0.109	0.112	0.16	0.178	0.38	0.133	SNP sin predominancia en alguna población	rs11045585-G
827784936	827784941	cohort	939		BREATHE	Study Cohort					= 0.002	OR	2.46	1.38	4.39	European	rs28364072	FCER2	corticosteroids	21958076	Dosage	yes		Allele G is associated with increased dose of corticosteroids in children Asthma as compared to allele A.	G	Pediatric		Is	Associated with	increased	dose of		in children	Disease:Asthma		A		0.652	0.256	0.261	0.52	0.239	0.586	0.252	SNP sin predominancia en alguna población	rs28364072-G
827786955	827786977	cohort	12		men, age 21-37.	Gender					= 0.01	Unknown				Multiple groups, 2 Black, 1 Asian, 9 Whites	rs7975	GSTZ1, POMT2	dichloroacetic acid	21642471	Other, Metabolism/PK	yes	The statement above is meant for a haplotype rather than for the allele. For the various possible haplotype combinations involving rs7975,rs7972,rs1046428, the most rapid clearance was observed for subjects having at least one "wild-type" allele (G for rs7975,G for rs7972, C for rs1046428. Rate was 2.2 +/- 0.7 vs 0.73 +/- 0.84 mL/min, and the very highest rate was seen in homozygous "wild-type".	Allele G is associated with increased clearance of dichloroacetic acid in healthy individuals.	G			Is	Associated with	increased	clearance of		in healthy individuals					0.48	0.78	0.77	0.73		0.605	0.775	SNP sin predominancia en alguna población	rs7975-G
827786978	827786996	cohort	12		men, age 21-37.	Age Group					= 0.01	Unknown				Multiple groups, 2 Black, 1 Asian, 9 Whites	rs7972	GSTZ1, POMT2	dichloroacetic acid	21642471	Other, Metabolism/PK	yes	The statement above is meant for a haplotype rather than for the allele. For the various possible haplotype combinations involving rs7975,rs7972,rs1046428, the most rapid clearance was observed for subjects having at least one "wild-type" allele (G for rs7975,G for rs7972, C for rs1046428. Rate was 2.2 +/- 0.7 vs 0.73 +/- 0.84 mL/min, and the very highest rate was seen in homozygous "wild-type".	Allele G is associated with increased metabolism of dichloroacetic acid in healthy individuals.	G			Is	Associated with	increased	metabolism of		in healthy individuals						0.97	0.99	0.99	0.97	0.99	0.976667	SNP sin predominancia en alguna población	rs7972-G
827786987	827786998	cohort	12		men, age 21-37.	Gender					= 0.01	Unknown				Multiple groups, 2 Black, 1 Asian, 9 Whites	rs1046428	GSTZ1, POMT2	dichloroacetic acid	21642471	Other, Metabolism/PK	yes	The statement above is meant for a haplotype rather than for the allele. For the various possible haplotype combinations involving rs7975,rs7972,rs1046428, the most rapid clearance was observed for subjects having at least one "wild-type" allele (G for rs7975,G for rs7972, C for rs1046428. Rate was 2.2 +/- 0.7 vs 0.73 +/- 0.84 mL/min, and the very highest rate was seen in homozygous "wild-type".	Allele C is associated with increased clearance of dichloroacetic acid in healthy individuals.	C			Is	Associated with	increased	clearance of		in healthy individuals					0.909	0.773	0.782	0.855	0.791	0.882	0.782	SNP sin predominancia en alguna población	rs1046428-C
827793107	827793114	cohort	93		Effect size of the response was measured (using BPRS percentage change score) after treatment with clozapine for at least 6 months.	Study Cohort	0.67	A			= 0.002	Unknown				European	rs686	DRD1	clozapine	21332319	Efficacy	yes	This association was found in carriers of the DRD3 rs6280 AA genotype (gene-gene interaction analysis).	Allele G is associated with increased response to clozapine in people with Schizophrenia as compared to allele A.	G			Is	Associated with	increased	response to		in people with	Disease:Schizophrenia		A		0.44	0.38	0.37	0.55	0.34	0.495	0.363333	SNP sin predominancia en alguna población	rs686-G
827807008	827807018	cohort	715		Chinese Community-based Comprehensive Prevention and Control of Hypertension (CCPACH) project.	Study Cohort					= 0.001	OR	1.9	1.3	2.8	Unknown	rs2106089	SPTA1	benazepril	21449848	Efficacy	yes	Only when rs4762 genotype (AGT gene) is also taken into account (gene-gene interaction model). Please see study for analysis details - the allele conferring increased likelihood of response/ sensitivity was not clear. Please note, this study reported alleles C>T - here we have represented the complementary alleles on the plus strand (G>A).	Allele G is associated with response to benazepril in men with Hypertension as compared to allele A.	G			Is	Associated with		response to		in men with	Disease:Hypertension		A		0.595		0.032		0.05	0.595	0.041	SNP sin predominancia en alguna población	rs2106089-G
827807563	827807569		207		workers from a copper mine	Study Cohort	0.09	C			= 7.0E-4	Unknown				Latino	rs11191439	AS3MT	Arsenic compounds	18334919	Toxicity, Metabolism/PK	yes	as measured by monomethylarsonous acid in urine.	Allele C is associated with increased metabolism of Arsenic compounds in healthy individuals as compared to allele T.	C			Is	Associated with	increased	metabolism of		in healthy individuals			T		0.5	0.104	0.085		0.105	0.5	0.098	SNP sin predominancia en alguna población	rs11191439-C
827807830	827807840	cohort	509		STRENGTH - high dose	Study Cohort					= 0.009	Unknown				Multiple groups, 82.4% white	rs7412	APOE	atorvastatin, pravastatin, simvastatin	20031551	Efficacy	yes	As measured by reduction in LDLc. Association was significant only at high doses.	Allele C is associated with decreased response to atorvastatin, pravastatin or simvastatin in people with Hyperlipidemias as compared to allele T.	C			Is	Associated with	decreased	response to	or	in people with	Disease:Hyperlipidemias		T		0.67	0.95	0.91	0.88	0.94	0.775	0.933333	SNP sin predominancia en alguna población	rs7412-C
827807849	827807854	cohort	244			Unknown					< 1.0E-4	Unknown				Unknown	rs10871454	STX4	phenprocoumon	21063236	Dosage	yes	Each additional VKORC1 variant allele reduced phenprocoumon maintenance dosage by 4.8 mg/week (P<0.0001) compared to wild type. The study found additive effects of the variant alleles of CYP2C9 (rs4086116) and CYP4F2 (rsrs2108622) on VKORC1.	Allele T is associated with decreased dose of phenprocoumon maintenance dosage by 4.8 mg/week as compared to allele C.	T			Is	Associated with	decreased	dose of			Other:maintenance dosage by 4.8 mg/week		C		0.5	0.346	0.415	0.145	0.379	0.3225	0.38	SNP sin predominancia en alguna población	rs10871454-T
827807860	827807880	cohort	244			Unknown					= 0.002	Unknown				Unknown	rs4086116	CYP2C9	phenprocoumon	21063236	Dosage	yes	Each additional CYP2C9 variant allele reduced phenprocoumon maintenance dosage by 2.2 mg/week (P=0.002).The study found additive effects of the variant alleles of CYP2C9 (rs4086116) and CYP4F2 (rsrs2108622) on VKORC1.	Allele T is associated with decreased dose of phenprocoumon maintenance dosage by 2.2 mg/week as compared to allele C.	T			Is	Associated with	decreased	dose of			Other:maintenance dosage by 2.2 mg/week		C		0.5	0.063	0.202	0.2		0.35	0.1325	SNP sin predominancia en alguna población	rs4086116-T
827807881	827807889	cohort	244			Unknown					= 0.022	Unknown				Unknown	rs2108622	CYP4F2	phenprocoumon	21063236	Dosage	yes	Each additional CYP4F2 variant allele increased phenprocoumon maintenance dosage 1.5 mg/week (P=0.022).The study found additive effects of the variant alleles of CYP2C9 (rs4086116) and CYP4F2 (rsrs2108622) on VKORC1.	Allele T is associated with increased dose of phenprocoumon maintenance dosage by 1.5 mg/week as compared to allele C.	T			Is	Associated with	increased	dose of			Other:maintenance dosage by 1.5 mg/week		C		0.556	0.275	0.282	0.075	0.278	0.3155	0.278333	SNP sin predominancia en alguna población	rs2108622-T
827808098	827808105	cohort, prospective	22		36 Caucasian and 22 African American warfarin users who reached maintenance dose	Study Cohort					= 0.002	Unknown				African American/Afro-Caribbean	rs17886199	PRSS53, VKORC1	warfarin	20716240	Dosage	yes	independent of the VKORC1 1173C>T and CYP2C9*2 and *3 variants in African Americans.	Allele A is associated with decreased dose of warfarin as compared to allele G.	A			Is	Associated with	decreased	dose of					G		0.5	1	1	0.96	1	0.73	1	SNP sin predominancia en alguna población	rs17886199-A
827808121	827808129	cohort	140			Unknown					= 0.07	Unknown				Multiple groups	rs1062613	HTR3A	clozapine	20168265	Efficacy	yes	As part of a haplotype: The A-C-C haplotype composed by rs2276302-rs1062613-rs1150226 was associated with better response (responder frequency 71.3%; non-responder frequency 57.9%, [chi]2=5.48; P=0.01; permutated P=0.04) whereas the G-T-T haplotype was nominally associated with worse response (responder frequency 5.9%; non-responder frequency 12.9%, [chi]2=3.98; P=0.04; permutated P=0.07)	Allele C is associated with increased response to clozapine in people with Schizophrenia as compared to allele T.	C			Is	Associated with	increased	response to		in people with	Disease:Schizophrenia		T		0.652	0.793	0.83	0.575	0.814	0.6135	0.812333	SNP sin predominancia en alguna población	rs1062613-C
827808138	827808146	cohort	140			Unknown					= 0.07	Unknown				Multiple groups	rs2276302	HTR3A	clozapine	20168265	Efficacy	yes	As part of a haplotype: The A-C-C haplotype composed by rs2276302-rs1062613-rs1150226 was associated with better response (responder frequency 71.3%; non-responder frequency 57.9%, [chi]2=5.48; P=0.01; permutated P=0.04) whereas the G-T-T haplotype was nominally associated with worse response (responder frequency 5.9%; non-responder frequency 12.9%, [chi]2=3.98; P=0.04; permutated P=0.07).	Allele A is associated with increased response to clozapine in people with Schizophrenia as compared to allele G.	A			Is	Associated with	increased	response to		in people with	Disease:Schizophrenia		G		0.717	0.731	0.787	0.51	0.754	0.6135	0.757333	SNP sin predominancia en alguna población	rs2276302-A
827808147	827808152	cohort	140			Unknown					= 0.07	Unknown				Multiple groups	rs1150226	HTR3A	clozapine	20168265	Efficacy	yes	As part of a haplotype: The A-C-C haplotype composed by rs2276302-rs1062613-rs1150226 was associated with better response (responder frequency 71.3%; non-responder frequency 57.9%, [chi]2=5.48; P=0.01; permutated P=0.04) whereas the G-T-T haplotype was nominally associated with worse response (responder frequency 5.9%; non-responder frequency 12.9%, [chi]2=3.98; P=0.04; permutated P=0.07).	Allele G is associated with increased response to clozapine in people with Schizophrenia as compared to allele A.	G			Is	Associated with	increased	response to		in people with	Disease:Schizophrenia		A		0.704	0.598	0.915	0.7	0.896	0.702	0.803	SNP sin predominancia en alguna población	rs1150226-G
827808153	827808160	cohort	1283			Unknown					= 1.0E-4	OR	0.55			Multiple groups	rs10919563	PTPRC	adalimumab, etanercept, infliximab	20309874	Efficacy	yes		Allele G is associated with increased response to adalimumab, etanercept or infliximab in people with Arthritis, Rheumatoid as compared to allele A.	G			Is	Associated with	increased	response to	or	in people with	Disease:Rheumatoid arthritis		A		0.28	0.88	0.73	0.53	0.66	0.405	0.756667	SNP predominantes en ancestría europea	rs10919563-G
827812190	827812194	cohort, retrospective	16		A genome-wide screen in patients who had disease progression or a partial/ complete response to treatment.	Study Cohort	0.44	C			= 2.4E-5	Unknown				Unknown	rs6458232		cisplatin, fluorouracil, mitoxantrone	21635146	Efficacy	yes	The study reported this variant as within the MDFI gene with alleles G/T. [stat_test: chi squared allele test]	Allele C is associated with response to cisplatin, fluorouracil and mitoxantrone in people with Carcinoma, Hepatocellular as compared to allele A.	C			Is	Associated with		response to	and	in people with	Disease:Hepatocellular Carcinoma		A		0.35	0.79	0.57		0.51	0.35	0.623333	SNP sin predominancia en alguna población	rs6458232-C
827812195	827812199	cohort, retrospective	16		A genome-wide screen in patients who had disease progression or a partial/ complete response to treatment.	Study Cohort	0.44	T			= 2.4E-5	Unknown				Unknown	rs7170769		cisplatin, fluorouracil, mitoxantrone	21635146	Efficacy	yes	The study reported this variant as within the SLCO3A1 gene and alleles A/ G. [stat_test: chi squared allele test]	Allele T is associated with response to cisplatin, fluorouracil and mitoxantrone in people with Carcinoma, Hepatocellular as compared to allele C.	T			Is	Associated with		response to	and	in people with	Disease:Hepatocellular Carcinoma		C		0.75	0.326	0.415		0.399	0.75	0.38	SNP sin predominancia en alguna población	rs7170769-T
827812200	827812204	cohort, retrospective	16		A genome-wide screen in patients who had disease progression or a partial/ complete response to treatment.	Study Cohort	0.44	C			= 2.4E-5	Unknown				Unknown	rs4932551		cisplatin, fluorouracil, mitoxantrone	21635146	Efficacy	yes	The study reported this variant as within the SLCO3A1 gene and alleles C/G - the allele conferring increased response to treatment is not clear. [stat_test: chi squared allele test]	Allele C is associated with response to cisplatin, fluorouracil and mitoxantrone in people with Carcinoma, Hepatocellular as compared to allele G.	C			Is	Associated with		response to	and	in people with	Disease:Hepatocellular Carcinoma		G		0.891	0.406	0.601		0.354	0.891	0.453667	SNP predominantes en ancestría africana	rs4932551-C
827813338	827813348		1014		Rotterdam study: Simvastatin and atorvastatin	Study Cohort					= 0.023	HR	1.29	1.04	1.61	European	rs717620	ABCC2	atorvastatin, simvastatin	22186618	Efficacy	yes	or switching to a different drug. Analysis of atorvastatin alone was not significant.	Allele T is associated with decreased dose of atorvastatin and simvastatin.	T			Is	Associated with	decreased	dose of	and						0.389	0.149	0.181	0.06	0.157	0.2245	0.162333	SNP sin predominancia en alguna población	rs717620-T
827813880	827813928	cohort	151		Tacrolimus combined with azathioprine or tacrolimus combined with sirolimus.	Drug	0.026	T			= 1.0E-4	Unknown				Multiple groups, Brazilian	rs10264272	CYP3A5	tacrolimus	21806386	Dosage, Metabolism/PK	yes	Described as CYP3A5*6 (14690G>A minus chromosomal strand). Association found between increasing number of CYP3A5 *3, *6 and *7 alleles and tacrolimus trough concentrations adjusted for dose. Lower CYP3A5 activity reduces tacrolimus clearance, resulting in decreased dose requirement.	Allele T is associated with decreased clearance of tacrolimus in people with Kidney Transplantation as compared to allele C.	T			Is	Associated with	decreased	clearance of		in people with	Disease:Kidney Transplantation		C		0.5	0.016	0.011	0.155	0.017	0.3275	0.0146667	SNP sin predominancia en alguna población	rs10264272-T
827813909	827813930	cohort	151		Tacrolimus combined with azathioprine or tacrolimus combined with sirolimus.	Drug	0.742	C			= 1.0E-4	Unknown				Multiple groups, Brazilian	rs776746	CYP3A5	tacrolimus	21806386	Dosage, Metabolism/PK	yes	Described as CYP3A5*3 (6986G>A minus chromosomal strand), but 6986A>G on the CYP nomenclature website, therefore here C represents the *3 allele. Association found between increasing number of CYP3A5 *3, *6 and *7 alleles and tacrolimus trough concentrations adjusted for dose. Lower CYP3A5 activity reduces tacrolimus clearance, resulting in decreased dose requirement.	Allele C is associated with decreased clearance of tacrolimus in people with Kidney Transplantation as compared to allele T.	C			Is	Associated with	decreased	clearance of		in people with	Disease:Kidney Transplantation		T		0.152	0.777		0.365	0.752	0.2585	0.7645	SNP predominantes en ancestría europea	rs776746-C
827814719	827814728	cohort	43			Unknown					= 0.004	Unknown				Near Eastern	rs9923231	VKORC1	warfarin	21148049	Dosage	yes	in Lebanese participants on long-term warfarin therapy.	Allele T is associated with decreased dose of warfarin as compared to allele C.	T			Is	Associated with	decreased	dose of					C		0.5	0.326	0.42	0.145	0.377	0.3225	0.374333	SNP sin predominancia en alguna población	rs9923231-T
827814729	827814739	cohort	133			Unknown					= 0.001	Unknown				Near Eastern	rs9923231	VKORC1	acenocoumarol	21148049	Dosage	yes	in Lebanese participants on long-term acenocoumarol therapy.	Allele T is associated with decreased dose of acenocoumarol as compared to allele C.	T			Is	Associated with	decreased	dose of					C		0.5	0.326	0.42	0.145	0.377	0.3225	0.374333	SNP sin predominancia en alguna población	rs9923231-T
827814740	827814748	cohort	43			Unknown					= 0.037	Unknown				Near Eastern	rs1057910	CYP2C9	warfarin	21148049	Dosage	yes		Allele C is associated with decreased dose of warfarin as compared to allele A.	C			Is	Associated with	decreased	dose of					A		0.5	0.058	0.064	0.01		0.255	0.061	SNP sin predominancia en alguna población	rs1057910-C
827815311	827815321	cohort	70		carbamazepine monotherapy	Drug	0.517	C			= 0.019	Unknown				Unknown	rs1051740	EPHX1	carbamazepine	19620853	Dosage, Metabolism/PK	yes	as part of a predictive algorithm that includes rs1051740, rs2234922 and age.	Allele C is associated with increased dose of carbamazepine in people with Epilepsy as compared to allele T.	C			Is	Associated with	increased	dose of		in people with	Disease:Epilepsy		T		0.625	0.336	0.309	0.215	0.323	0.42	0.322667	SNP sin predominancia en alguna población	rs1051740-C
827815322	827815332	cohort	70		carbamazepine monotherapy	Drug	0.35	G			= 0.027	Unknown				Unknown	rs2234922	EPHX1	carbamazepine	19620853	Dosage, Metabolism/PK	yes	as part of a predictive algorithm that includes rs1051740, rs2234922 and age.	Allele G is associated with increased dose of carbamazepine in people with Epilepsy as compared to allele A.	G			Is	Associated with	increased	dose of		in people with	Disease:Epilepsy		A		0.526	0.167	0.17	0.335	0.17	0.4305	0.169	SNP sin predominancia en alguna población	rs2234922-G
827815479	827815485	cohort	60			Unknown					< 0.05	OR	2	1.19	3.38	Unknown	rs1800795	IL6	Tumor necrosis factor alpha (TNF-alpha) inhibitors	22158445	Efficacy	yes	Obesity and the minus174G/C IL-6 gene promoter polymorphism predicted poor response to anti-TNF-a therapies [odds; ratio for C(minus) carriers, obese: 2.00 confidence interval: 1.19 to 3.38; P=0.05].	Allele G is associated with decreased response to Tumor necrosis factor alpha (TNF-alpha) inhibitors in people with Psoriasis as compared to allele C.	G			Is	Associated with	decreased	response to		in people with	Disease:Psoriasis		C		0.941	0.753	0.713	0.95	0.217	0.9455	0.561	SNP sin predominancia en alguna población	rs1800795-G
827815502	827815511	cohort	85			Unknown					= 0.025	Unknown				Unknown	rs1979277	SHMT1	bevacizumab, fluorouracil, irinotecan, leucovorin	22044939	Efficacy	yes		Allele A is associated with increased response to bevacizumab, fluorouracil, irinotecan and leucovorin in people with Colorectal Neoplasms as compared to allele G.	A			Is	Associated with	increased	response to	and	in people with	Disease:Colorectal Neoplasms		G		0.542	0.248	0.287		0.249	0.542	0.261333	SNP sin predominancia en alguna población	rs1979277-A
827823495	827823501	cohort	130	84	Patients from the Moscow City Multiple Sclerosis Center. Cases = responders, controls = non responders. Odds value >1 was a positive association with response to the drug [stat_test: permutation p value]	Study Cohort	0.186	A	0.345	A	= 0.049	OR	0.43	0.23	0.81	European	rs1800469	TGFB1	glatiramer acetate	22111603	Efficacy	yes	Significant only when also combined with the HLA-DRB1*15 allele. Risk of not responding to the drug was significantly increased in individuals carrying this allele combination. This risk was further increased in individuals with the HLA-DRB1*15-rs1800469 A-rs333 del allele combination and HLA-DRB1*15-rs1800469 A-rs333 del-rs1012335 G allele combination.	Allele A is associated with decreased response to glatiramer acetate in people with Multiple Sclerosis as compared to allele G.	A			Is	Associated with	decreased	response to		in people with	Disease:Multiple Sclerosis		G		0.21	0.55	0.44	0.29	0.48	0.25	0.49	SNP sin predominancia en alguna población	rs1800469-A
827823546	827823551	cohort	130	84	Patients from the Moscow City Multiple Sclerosis Center. Cases = responders, controls = non responders. Odds value >1 was a positive association with response to the drug [stat_test: permutation p value, peto's method odds ratio]	Study Cohort	0	G	0.107	G	= 0.0056	OR	0.072	0.02	0.28	European	rs1012335	IFNAR1	glatiramer acetate	22111603	Efficacy	yes	Significant only when also combined with the HLA-DRB1*15 allele, rs1800469 allele A and rs333 del allele. Risk of not responding to the drug was significantly increased in individuals carrying this allele combination.	Allele G is associated with decreased response to glatiramer acetate in people with Multiple Sclerosis as compared to allele C.	G			Is	Associated with	decreased	response to		in people with	Disease:Multiple Sclerosis		C		0.42	0.79	0.57			0.42	0.68	SNP sin predominancia en alguna población	rs1012335-G
827823816	827823824	cohort	218		Patients at a coagulation clinic who had INR 2.0-3.5 and stable warfarin dose for at least two consecutive visits.	Study Cohort					= 0.01	Unknown				Multiple groups, 91 Malays;96 Chinese;46 Indians.	rs1799853	CYP2C9	warfarin	21110192	Dosage	yes	T = CYP2C9*2. C = CYP2C9*1. *2 and *3 were pooled together in this comparison to *1.; CYP2C9(*2 + *3) were associated with a lower maintenance dose (2.9 vs 3.7 mg for *1). [stat_test:linear regression]	Allele T is associated with decreased dose of warfarin as compared to allele C.	T			Is	Associated with	decreased	dose of					C			0.089	0.122	0.035		0.035	0.1055	SNP sin predominancia en alguna población	rs1799853-T
827823825	827823836	cohort	218		Patients at a coagulation clinic who had INR 2.0-3.5 and stable warfarin dose for at least two consecutive visits.	Study Cohort					= 0.01	Unknown				Multiple groups, 91 Malays;96 Chinese;46 Indians.	rs1057910	CYP2C9	warfarin	21110192	Dosage	yes	C = CYP2C9*3. A = CYP2C9*1. *2 and *3 were pooled together in this comparison to *1. CYP2C9(*2 + *3) were associated with a lower maintenance dose (2.9 vs 3.7 mg for *1). [stat_test:linear regression]	Allele C is associated with decreased dose of warfarin as compared to allele A.	C			Is	Associated with	decreased	dose of					A		0.5	0.058	0.064	0.01		0.255	0.061	SNP sin predominancia en alguna población	rs1057910-C
827826357	827826366	case/control	9	24	cases = non-responders, controls = responders	Study Cohort	0.28	A	0.19	A	= 0.05	Unknown				East Asian	rs628031	SLC22A1	metformin	17111267	Efficacy	yes	Significance given as part of stepwise analysis with age, BMI, treatment with lipid lowering agents and -43T>G (intron 1).	Allele A is associated with decreased response to metformin in people with Diabetes Mellitus, Type 2 as compared to allele G.	A			Is	Associated with	decreased	response to		in people with	Disease:Diabetes Mellitus, Type 2		G		0.25	0.3	0.35	0.27	0.29	0.26	0.313333	SNP sin predominancia en alguna población	rs628031-A
827830235	827830244	cohort	64		Patients who had received a renal transplant at least 1 year before the start of the study and were administered cyclosporin or tacrolimus. Only two patients carried the *3 allele (allele G).	Study Cohort						Unknown				Multiple groups	rs4986910	CYP3A4	tacrolimus	12966368	Dosage, Metabolism/PK	yes	as calculated by increased tacrolimus dose-adjusted concentrations, therefore a reduced dose is required to reach target trough concentrations of drug. Though due to low frequency of CYP3A4*3 alleles, this could not be statistically calculated. allele G = CYP3A4*3, allele A = CYP3A4*1.	Allele G is associated with decreased dose of tacrolimus in people with Kidney Transplantation as compared to allele A.	G			Is	Associated with	decreased	dose of		in people with	Disease:Kidney Transplantation		A			0.019	0.021	0		0	0.02	SNP sin predominancia en alguna población	rs4986910-G
827848013	827848529	cohort	92		HIV positive	Disease					= 0.06	Unknown				Multiple groups, population comprised whites, african american, asian and hispanics	rs3745274	CYP2B6	nevirapine	22354160	Toxicity, Metabolism/PK	yes		Allele T is associated with decreased clearance of nevirapine in people with HIV Infections as compared to allele G.	T			Is	Associated with	decreased	clearance of		in people with	Disease:HIV infectious disease		G		0.619	0.33	0.367	0.467	0.354	0.543	0.350333	SNP sin predominancia en alguna población	rs3745274-T
827864546	827864547	cohort	195		taking stable weekly doses of warfarin for 3 consecutive clinic visits	Drug	0.117	T			= 4.0E-4	Unknown				Near Eastern	rs1799853	CYP2C9	warfarin	21228733	Dosage	yes	This SNP defines CYP2C9*2. CYP2C9 *2,*3,*4,*5,*8 were grouped into three groups for testing: *1/*1 vs. *1/*2 + *1/*3 + *1/*4 + *1/*5 + *1/*8 vs *2/*2 + *2/*3 + *3/*3 + *5/*5. People having one or two variant alleles had lower dose requirements than people who were *1/*1.	Allele T is associated with decreased dose of warfarin as compared to allele C.	T			Is	Associated with	decreased	dose of					C			0.089	0.122	0.035		0.035	0.1055	SNP sin predominancia en alguna población	rs1799853-T
827864548	827864549	cohort	195		taking stable weekly doses of warfarin for 3 consecutive clinic visits	Drug	0.008	A			= 4.0E-4	Unknown				Near Eastern	rs7900194	CYP2C9	warfarin	21228733	Dosage	yes	This SNP defines CYP2C9*8. CYP2C9 *2,*3,*4,*5,*8 were grouped into three groups for testing: *1/*1 vs. *1/*2 + *1/*3 + *1/*4 + *1/*5 + *1/*8 vs *2/*2 + *2/*3 + *3/*3 + *5/*5. People having one or two variant alleles had lower dose requirements than people who were *1/*1.	Allele A is associated with decreased dose of warfarin as compared to allele G.	A			Is	Associated with	decreased	dose of					G		0.5	0.005	0	0.045		0.2725	0.0025	SNP sin predominancia en alguna población	rs7900194-A
827864554	827864555	cohort	195		taking stable weekly doses of warfarin for 3 consecutive clinic visits	Drug	0.01	G			= 4.0E-4	Unknown				Near Eastern	rs28371686	CYP2C9	warfarin	21228733	Dosage	yes	This SNP defines CYP2C9*5. CYP2C9 *2,*3,*4,*5,*8 were grouped into three groups for testing: *1/*1 vs. *1/*2 + *1/*3 + *1/*4 + *1/*5 + *1/*8 vs *2/*2 + *2/*3 + *3/*3 + *5/*5. People having one or two variant alleles had lower dose requirements than people who were *1/*1.	Allele G is associated with decreased dose of warfarin as compared to allele C.	G			Is	Associated with	decreased	dose of					C		0.5	0.002	0	0.005		0.2525	0.001	SNP sin predominancia en alguna población	rs28371686-G
827864556	827864557	cohort	195		taking stable weekly doses of warfarin for 3 consecutive clinic visits	Drug	0.067	C			= 0.01	Unknown				Near Eastern	rs429358	APOC1, APOE	warfarin	21228733	Dosage	yes		Allele T is associated with decreased dose of warfarin in people with haplotype epsilon2.	T			Is	Associated with	decreased	dose of		in people with	Other:haplotype epsilon2				0.38	0.89	0.85	0.88		0.63	0.87	SNP sin predominancia en alguna población	rs429358-T
827864560	827864561	cohort	195		taking stable weekly doses of warfarin for 3 consecutive clinic visits	Drug	0.074	T			= 0.01	Unknown				Near Eastern	rs7412	APOC1, APOE	warfarin	21228733	Dosage	yes		Allele T is associated with decreased dose of warfarin in people with haplotype epsilon2.	T			Is	Associated with	decreased	dose of		in people with	Other:haplotype epsilon2				0.333	0.048	0.085	0.117	0.056	0.225	0.063	SNP sin predominancia en alguna población	rs7412-T
827864562	827864563	cohort	195		taking stable weekly doses of warfarin for 3 consecutive clinic visits	Drug	0.092	C			= 4.0E-4	Unknown				Near Eastern	rs1057910	CYP2C9	warfarin	21228733	Dosage	yes	This SNP defines CYP2C9*3. CYP2C9 *2,*3,*4,*5,*8 were grouped into three groups for testing: *1/*1 vs. *1/*2 + *1/*3 + *1/*4 + *1/*5 + *1/*8 vs *2/*2 + *2/*3 + *3/*3 + *5/*5. People having one or two variant alleles had lower dose requirements than people who were *1/*1.	Allele C is associated with decreased dose of warfarin as compared to allele A.	C			Is	Associated with	decreased	dose of					A		0.5	0.058	0.064	0.01		0.255	0.061	SNP sin predominancia en alguna población	rs1057910-C
827919768	827919795	cohort	89		Patients with suspected or known coronary artery disease, administered a loading dose of clopidogrel (300mg) and then maintenance dose (75mg) for 5-7 days before PCI or coronary angiography, when the blood sample was taken for PD measurements.	Study Cohort					= 0.001	Unknown				Multiple groups, Chinese, Malay, Indian mixed population.	rs4244285	CYP2C19	clopidogrel	22462746	Efficacy	yes	as measured by platelet reactivity index (platelet vasodilator-stimulated phosphoprotein test) on blood collected from patients. Patients with one (p=0.001) or two (p<0.001) loss-of-function alleles (CYP2C19*2 (genotyped rs4244285 G>A) or CYP2C19*3 (genotyped rs4986893 G>A)) had a significantly increased platelet reactivity index compared to those without loss-of-function alleles. [stat_test: mul…	Allele A is associated with decreased response to clopidogrel in people with Coronary Artery Disease as compared to allele G.	A			Is	Associated with	decreased	response to		in people with	Disease:Coronary Artery Disease		G		0.5	0.087	0.106	0.14	0.114	0.32	0.102333	SNP sin predominancia en alguna población	rs4244285-A
827919808	827919815	cohort	89		Patients with suspected or known coronary artery disease, administered a loading dose of clopidogrel (300mg) and then maintenance dose (75mg) for 5-7 days before PCI or coronary angiography, when the blood sample was taken for PD measurements.	Study Cohort					= 0.001	Unknown				Multiple groups, Chinese, Malay, Indian mixed population.	rs4986893	CYP2C19	clopidogrel	22462746	Efficacy	yes	as measured by platelet reactivity index (platelet vasodilator-stimulated phosphoprotein test) on blood collected from patients. Patients with one (p=0.001) or two (p<0.001) loss-of-function alleles (CYP2C19*2 (genotyped rs4244285 G>A) or CYP2C19*3 (genotyped rs4986893 G>A)) had a significantly increased platelet reactivity index compared to those without loss-of-function alleles. [stat_test: mul…	Allele A is associated with decreased response to clopidogrel in people with Coronary Artery Disease as compared to allele G.	A			Is	Associated with	decreased	response to		in people with	Disease:Coronary Artery Disease		G				0	0		0	0	SNP sin predominancia en alguna población	rs4986893-A
827920220	827920225	cohort	11	80	80 AML patients in complete (85%) and partial (3%) remission; was compared with that of 11 AML patients with no response. For freq cases = resistant, controls = responsive; (12%).	Disease	0.7	A	0.291	A	= 5.0E-4	OR	8.08	2.31	28.29	Unknown	rs6811453	ADH1A	cytarabine, fludarabine, gemtuzumab ozogamicin, idarubicin	22584460	Efficacy	yes	rs6811453 was in linkage with rs1826909, another SNP in ADH1A.	Allele A is associated with increased resistance to cytarabine, fludarabine, gemtuzumab ozogamicin and idarubicin in people with Leukemia, Myeloid, Acute as compared to allele G.	A			Is	Associated with	increased	resistance to	and	in people with	Disease:Leukemia, Myeloid, Acute		G		0.5	0.3	0.261		0.253	0.5	0.271333	SNP sin predominancia en alguna población	rs6811453-A
827920229	827920234	cohort	11	80	80 AML patients in complete (85%) and partial (3%) remission was compared with that of 11 AML patients with no response. For freq cases = resistant, controls = responsive (12%).	Study Cohort	0.7	T	0.304	T	= 9.0E-4	OR	8.14	2.28	28.99	Unknown	rs1826909	ADH1A	cytarabine, fludarabine, gemtuzumab ozogamicin, idarubicin	22584460	Efficacy	yes	rs1826909 was in linkage with rs6811453, another SNP in ADH1A.	Allele T is associated with increased resistance to cytarabine, fludarabine, gemtuzumab ozogamicin and idarubicin in people with Leukemia, Myeloid, Acute as compared to allele C.	T			Is	Associated with	increased	resistance to	and	in people with	Disease:Leukemia, Myeloid, Acute		C		0.5	0.188	0.255	0.12	0.26	0.31	0.234333	SNP sin predominancia en alguna población	rs1826909-T
827921704	827921715	replication	215		Test set (Leukotriene Modifier Or Corticosteroid or Corticosteroid Salmeterol (LOCCS) trial16 and the IMProving Asthma Control Trial (IMPACT))	Study Cohort					= 0.025	Unknown				European	rs1876828	CRHR1	glucocorticoids	22641026	Efficacy	yes	as part of a two SNP predictive test of FEV1 change, which identified patients with good or poor steroid response (highest or lowest quartile, respectively). P values are for predictive performance of the test.	Allele T is associated with increased response to glucocorticoids in people with Asthma as compared to allele C.	T			Is	Associated with	increased	response to		in people with	Disease:Asthma		C		0.5	0.123	0.181	0.015		0.2575	0.152	SNP sin predominancia en alguna población	rs1876828-T
827921716	827921722	replication	215		Test set (Leukotriene Modifier Or Corticosteroid or Corticosteroid Salmeterol (LOCCS) trial16 and the IMProving Asthma Control Trial (IMPACT))	Study Cohort					= 0.025	Unknown				European	rs37973	GLCCI1	glucocorticoids	22641026	Efficacy	yes	as part of a two SNP predictive test of FEV1 change, which identified patients with good or poor steroid response (highest or lowest quartile, respectively). P values are for predictive performance of the test.	Allele G is associated with increased response to glucocorticoids in people with Asthma as compared to allele A.	G			Is	Associated with	increased	response to		in people with	Disease:Asthma		A		0.12	0.55	0.46	0.2	0.44	0.16	0.483333	SNP sin predominancia en alguna población	rs37973-G
827921971	827921995	clinical trial	719		UW-TTURC study: individuals motivated to quit smoking, smoke 10 or more cigarettes a day were recruited for the clinical trial received placebo or treatment (nicotine replacement therapy, bupropion or combined treatments) for 8 weeks. Please note; statistics given are for Relative Hazard (not Hazard Ratio) and for the group in the cohort with haplotype 3.	Study Cohort					= 9.7E-7	HR	0.48	0.36	0.64	Unknown	rs16969968	CHRNA3, CHRNA5	Drugs used in nicotine dependence	22648373	Other	yes	in haplotype analysis; individuals with haplotype 3 (rs16969968 allele A - rs680244 allele C) were more likely to respond to active treatment/ had a lower risk of relapse (remain abstinent from smoking cigarettes) than those with haplotype 3 that were treated with placebo. The odds of abstinence from cigarette smoking were not significantly different in individuals with haplotype 1 (rs16969968 al…	Allele A is associated with increased response to Drugs used in nicotine dependence in people with Tobacco Use Disorder.	A			Is	Associated with	increased	response to		in people with	Disease:Tobacco Use Disorder					0.239	0.346	0.05	0.239	0.05	0.274667	SNP sin predominancia en alguna población	rs16969968-A
827921983	827921993	clinical trial	719		UW-TTURC study: individuals motivated to quit smoking, smoke 10 or more cigarettes a day were recruited for the clinical trial received placebo or treatment (nicotine replacement therapy, bupropion or combined treatments) for 8 weeks. Please note; statistics given are for Relative Hazard (not Hazard Ratio) and for the group in the cohort with haplotype 3.	Study Cohort					= 9.7E-7	HR	0.48	0.36	0.64	Unknown	rs680244	CHRNA5	Drugs used in nicotine dependence	22648373	Other	yes	in haplotype analysis; individuals with haplotype 3 (rs16969968 allele A - rs680244 allele C) were more likely to respond to active treatment/ had a lower risk of relapse (ability to quit smoking as measured by time to relapse to smoking over 60 days) than those with haplotype 3 that were treated with placebo. The ability to quit cigarette smoking were not significantly different in individuals w…	Allele C is associated with increased response to Drugs used in nicotine dependence in people with Tobacco Use Disorder.	C			Is	Associated with	increased	response to		in people with	Disease:Tobacco Use Disorder				0.742	0.412	0.787	0.68	0.75	0.711	0.649667	SNP sin predominancia en alguna población	rs680244-C
827921996	827922009	clinical trial	889		UW-TTURC study: individuals motivated to quit smoking, smoke 10 or more cigarettes a day were recruited for the clinical trial received placebo or treatment (nicotine replacement therapy, bupropion or combined treatments) for 8 weeks. Please note; statistics given are for Relative Hazard (not Hazard Ratio) and for the group in the cohort with haplotype 2.	Study Cohort					= 2.7E-8	HR	0.48	0.37	0.62	Unknown	rs16969968	CHRNA3, CHRNA5	Drugs used in nicotine dependence	22648373	Other	yes	in haplotype analysis; individuals with haplotype 2 (rs16969968 allele G - rs680244 allele T) were more likely to respond to active treatment/ had a lower risk of relapse (ability to quit smoking as measured by time to relapse to smoking over 60 days) than those with haplotype 2 that were treated with placebo. The ability to quit cigarette smoking was not significantly different in individuals wi…	Allele G is associated with increased response to Drugs used in nicotine dependence in people with Tobacco Use Disorder.	G			Is	Associated with	increased	response to		in people with	Disease:Tobacco Use Disorder					0.76	0.65	0.95	0.76	0.95	0.723333	SNP sin predominancia en alguna población	rs16969968-G
827922003	827922011	clinical trial	889		UW-TTURC study: individuals motivated to quit smoking, smoke 10 or more cigarettes a day were recruited for the clinical trial received placebo or treatment (nicotine replacement therapy, bupropion or combined treatments) for 8 weeks. Please note; statistics given are for Relative Hazard (not Hazard Ratio) and for the group in the cohort with haplotype 2.	Study Cohort					= 2.7E-8	HR	0.48	0.37	0.62	Unknown	rs680244	CHRNA5	Drugs used in nicotine dependence	22648373	Other	yes	in haplotype analysis; individuals with haplotype 2 (rs16969968 allele G - rs680244 allele T) were more likely to respond to active treatment/ had a lower risk of relapse (ability to quit smoking as measured by time to relapse to smoking over 60 days) than those with haplotype 2 that were treated with placebo. The ability to quit cigarette smoking was not significantly different in individuals wi…	Allele T is associated with increased response to Drugs used in nicotine dependence in people with Tobacco Use Disorder.	T			Is	Associated with	increased	response to		in people with	Disease:Tobacco Use Disorder				0.26	0.59	0.21	0.32	0.25	0.29	0.35	SNP sin predominancia en alguna población	rs680244-T
981238152	981238158	cohort	105	44	Here we represent cases = responders, controls = nonresponders. Response assessed by change from baseline in Brief Psychiatric Rating Scale after a 1 year follow-up.	Study Cohort	0.61	A	0.75	A	= 0.02	OR	1.92	1.065	3.48	Central/South Asian	rs1128503	ABCB1	antipsychotics	22909202	Efficacy	yes	Please note: this variant deviated from Hardy-Weinberg equilibrium in a pooled group of responders and non-responders. Alleles have been complemented to the plus chromosomal strand. Allele frequencies displayed significant differences in responders vs non-responders, however genotype frequencies were not significantly different (p=0.08).	Allele G is associated with increased response to antipsychotics in people with Schizophrenia.	G			Is	Associated with	increased	response to		in people with	Disease:Schizophrenia				0.833	0.519	0.574	0.705	0.551	0.769	0.548	SNP sin predominancia en alguna población	rs1128503-G
981238190	981238201	cohort	128	55	cases = responders, controls = nonresponders. Response assessed by change from baseline in Brief Psychiatric Rating Scale after a 1 year follow-up.	Study Cohort	0.63	A	0.75	A	= 0.03	OR	1.728	1.728	2.935	Central/South Asian	rs1045642	ABCB1	antipsychotics	22909202	Efficacy	yes	Please note alleles have been complemented to the plus chromosomal strand. Allele frequencies and genotype frequencies displayed significant differences in responders vs non-responders.	Allele G is associated with increased response to antipsychotics in people with Schizophrenia.	G			Is	Associated with	increased	response to		in people with	Disease:Schizophrenia				0.788	0.548	0.559	0.73		0.759	0.5535	SNP sin predominancia en alguna población	rs1045642-G
981238655	981238660	retrospective	93		CATIE Study - a total of 18 months, patients were initially randomly assigned olanzapine, perphenazine, quetiapine, risperidone or ziprasidone.	Study Cohort					= 1.66E-4	Unknown				European	rs17070785	CSMD1	olanzapine	22920393	Efficacy	yes	as measured by changes in PANSS-T (positive and negative syndrome scale total score), using a mixed model repeated measures approach. Examined 6789 SNPs - p-value of p< or equal to 5x10-4 was considered significant. It was unclear whether the allele was associated with an increased or decreased response to drug.	Allele A is associated with response to olanzapine in people with Schizophrenia.	A			Is	Associated with		response to		in people with	Disease:Schizophrenia				0.44	0.82	0.87		0.86	0.44	0.85	SNP predominantes en ancestría europea	rs17070785-A
981238661	981238674	retrospective	93		CATIE Study - a total of 18 months, patients were initially randomly assigned olanzapine, perphenazine, quetiapine, risperidone or ziprasidone.	Study Cohort					= 2.07E-4	Unknown				European	rs2247408	PLAGL1	olanzapine	22920393	Efficacy	yes	as measured by changes in PANSS-T (positive and negative syndrome scale total score), using a mixed model repeated measures approach. Examined 6789 SNPs - p-value of p< or equal to 5x10-4 was considered significant. It was unclear whether the allele was associated with an increased or decreased response to drug.	Allele C is associated with response to olanzapine in people with Schizophrenia.	C			Is	Associated with		response to		in people with	Disease:Schizophrenia				0.611	0.5	0.665		0.609	0.611	0.591333	SNP sin predominancia en alguna población	rs2247408-C
981238675	981238688	retrospective	93		CATIE Study - a total of 18 months, patients were initially randomly assigned olanzapine, perphenazine, quetiapine, risperidone or ziprasidone.	Study Cohort					= 2.43E-4	Unknown				European	rs3819811	PLAGL1	olanzapine	22920393	Efficacy	yes	as measured by changes in PANSS-T (positive and negative syndrome scale total score), using a mixed model repeated measures approach. Examined 6789 SNPs - p-value of p< or equal to 5x10-4 was considered significant. It was unclear whether the allele was associated with an increased or decreased response to drug.	Allele A is associated with response to olanzapine in people with Schizophrenia.	A			Is	Associated with		response to		in people with	Disease:Schizophrenia				0.32	0.36	0.31			0.32	0.335	SNP sin predominancia en alguna población	rs3819811-A
981238689	981238700	retrospective	93		CATIE Study - a total of 18 months, patients were initially randomly assigned olanzapine, perphenazine, quetiapine, risperidone or ziprasidone.	Study Cohort					= 3.33E-4	Unknown				European	rs221253	PTPRN2	olanzapine	22920393	Efficacy	yes	as measured by changes in PANSS-T (positive and negative syndrome scale total score), using a mixed model repeated measures approach. Examined 6789 SNPs - p-value of p< or equal to 5x10-4 was considered significant. It was unclear whether the allele was associated with an increased or decreased response to drug.	Allele C is associated with response to olanzapine in people with Schizophrenia.	C			Is	Associated with		response to		in people with	Disease:Schizophrenia				0.971	0.906	0.952			0.971	0.929	SNP sin predominancia en alguna población	rs221253-C
981238701	981238706	retrospective	76		CATIE Study - a total of 18 months, patients were initially randomly assigned olanzapine, perphenazine, quetiapine, risperidone or ziprasidone.	Study Cohort					= 7.72E-6	Unknown				European	rs11774231		perphenazine	22920393	Efficacy	yes	as measured by changes in PANSS-T (positive and negative syndrome scale total score), using a mixed model repeated measures approach. Examined 6789 SNPs - p-value of p< or equal to 5x10-4 was considered significant. It was unclear whether the allele was associated with an increased or decreased response to drug.	Allele C is associated with response to perphenazine in people with Schizophrenia.	C			Is	Associated with		response to		in people with	Disease:Schizophrenia				0.5	0.92	0.94		0.92	0.5	0.926667	SNP sin predominancia en alguna población	rs11774231-C
981238713	981238719	retrospective	76		CATIE Study - a total of 18 months, patients were initially randomly assigned olanzapine, perphenazine, quetiapine, risperidone or ziprasidone.	Study Cohort					= 2.25E-5	Unknown				European	rs17570753	MCPH1	perphenazine	22920393	Efficacy	yes	as measured by changes in PANSS-T (positive and negative syndrome scale total score), using a mixed model repeated measures approach. Examined 6789 SNPs - p-value of p< or equal to 5x10-4 was considered significant. It was unclear whether the allele was associated with an increased or decreased response to drug.	Allele A is associated with response to perphenazine in people with Schizophrenia.	A			Is	Associated with		response to		in people with	Disease:Schizophrenia				0.5	0.016	0.064		0.083	0.5	0.0543333	SNP sin predominancia en alguna población	rs17570753-A
981238720	981238725	retrospective	76		CATIE Study - a total of 18 months, patients were initially randomly assigned olanzapine, perphenazine, quetiapine, risperidone or ziprasidone.	Study Cohort					= 2.09E-4	Unknown				European	rs2116971	CDH13	perphenazine	22920393	Efficacy	yes	as measured by changes in PANSS-T (positive and negative syndrome scale total score), using a mixed model repeated measures approach. Examined 6789 SNPs - p-value of p< or equal to 5x10-4 was considered significant. Please note: the allele was reported as C (though this gene is found on the plus chromosomal strand). It was unclear whether the allele was associated with an increased or decreased r…	Allele G is associated with response to perphenazine in people with Schizophrenia.	G			Is	Associated with		response to		in people with	Disease:Schizophrenia				0.32	0.83	0.72			0.32	0.775	SNP predominantes en ancestría europea	rs2116971-G
981238726	981238731	retrospective	76		CATIE Study - a total of 18 months, patients were initially randomly assigned olanzapine, perphenazine, quetiapine, risperidone or ziprasidone.	Study Cohort					= 3.41E-4	Unknown				European	rs9952628	SKOR2	perphenazine	22920393	Efficacy	yes	as measured by changes in PANSS-T (positive and negative syndrome scale total score), using a mixed model repeated measures approach. Examined 6789 SNPs - p-value of p< or equal to 5x10-4 was considered significant. It was unclear whether the allele was associated with an increased or decreased response to drug.	Allele G is associated with response to perphenazine in people with Schizophrenia.	G			Is	Associated with		response to		in people with	Disease:Schizophrenia				0.5	0.82	0.62		0.59	0.5	0.676667	SNP sin predominancia en alguna población	rs9952628-G
981238732	981238737	retrospective	76		CATIE Study - a total of 18 months, patients were initially randomly assigned olanzapine, perphenazine, quetiapine, risperidone or ziprasidone.	Study Cohort					= 4.83E-4	Unknown				European	rs11100483	MAML3	perphenazine	22920393	Efficacy	yes	as measured by changes in PANSS-T (positive and negative syndrome scale total score), using a mixed model repeated measures approach. Examined 6789 SNPs - p-value of p< or equal to 5x10-4 was considered significant. It was unclear whether the allele was associated with an increased or decreased response to drug.	Allele A is associated with response to perphenazine in people with Schizophrenia.	A			Is	Associated with		response to		in people with	Disease:Schizophrenia				0.562	0.089	0.298		0.307	0.562	0.231333	SNP sin predominancia en alguna población	rs11100483-A
981238738	981238747	retrospective	94		CATIE Study - a total of 18 months, patients were initially randomly assigned olanzapine, perphenazine, quetiapine, risperidone or ziprasidone.	Study Cohort					= 1.81E-4	Unknown				European	rs35793	KCNMA1	quetiapine	22920393	Efficacy	yes	as measured by changes in PANSS-T (positive and negative syndrome scale total score), using a mixed model repeated measures approach. Examined 6789 SNPs - p-value of p< or equal to 5x10-4 was considered significant. Please note: reported allele was C, this has been complemented to the plus chromosomal strand. It was unclear whether the allele was associated with an increased or decreased response…	Allele G is associated with response to quetiapine in people with Schizophrenia.	G			Is	Associated with		response to		in people with	Disease:Schizophrenia				0.583	0.017	0.101		0.115	0.583	0.0776667	SNP sin predominancia en alguna población	rs35793-G
981238767	981238776	retrospective	97		CATIE Study - a total of 18 months, patients were initially randomly assigned olanzapine, perphenazine, quetiapine, risperidone or ziprasidone.	Study Cohort					= 3.04E-4	Unknown				European	rs1315115	NPAS3	risperidone	22920393	Efficacy	yes	as measured by changes in PANSS-T (positive and negative syndrome scale total score), using a mixed model repeated measures approach. Examined 6789 SNPs - p-value of p< or equal to 5x10-4 was considered significant. Please note: the allele was reported as C (though this gene is found on the plus chromosomal strand). It was unclear whether the allele was associated with an increased or decreased r…	Allele G is associated with response to risperidone in people with Schizophrenia.	G			Is	Associated with		response to		in people with	Disease:Schizophrenia				0.14	0.1	0.06			0.14	0.08	SNP sin predominancia en alguna población	rs1315115-G
981238783	981238788	retrospective	47		CATIE Study - a total of 18 months, patients were initially randomly assigned olanzapine, perphenazine, quetiapine, risperidone or ziprasidone.	Study Cohort					= 6.29E-5	Unknown				European	rs4925300	CDH4	ziprasidone	22920393	Efficacy	yes	as measured by changes in PANSS-T (positive and negative syndrome scale total score), using a mixed model repeated measures approach. Examined 6789 SNPs - p-value of p< or equal to 5x10-4 was considered significant. It was unclear whether the allele was associated with an increased or decreased response to drug.	Allele A is associated with response to ziprasidone in people with Schizophrenia.	A			Is	Associated with		response to		in people with	Disease:Schizophrenia				0.63	0.538	0.543		0.555	0.63	0.545333	SNP sin predominancia en alguna población	rs4925300-A
981238789	981238795	retrospective	47		CATIE Study - a total of 18 months, patients were initially randomly assigned olanzapine, perphenazine, quetiapine, risperidone or ziprasidone.	Study Cohort					= 1.3E-4	Unknown				European	rs1546519	LYN	ziprasidone	22920393	Efficacy	yes	as measured by changes in PANSS-T (positive and negative syndrome scale total score), using a mixed model repeated measures approach. Examined 6789 SNPs - p-value of p< or equal to 5x10-4 was considered significant. Please note: reported allele was C, this has been complemented to the plus chromosomal strand. It was unclear whether the allele was associated with an increased or decreased response…	Allele G is associated with response to ziprasidone in people with Schizophrenia.	G			Is	Associated with		response to		in people with	Disease:Schizophrenia				0.07	0.29	0.25		0.25	0.07	0.263333	SNP sin predominancia en alguna población	rs1546519-G
981238796	981238802	cohort	47		CATIE Study - a total of 18 months, patients were initially randomly assigned olanzapine, perphenazine, quetiapine, risperidone or ziprasidone.	Study Cohort					= 4.41E-4	Unknown				European	rs17194378	CNTN4	ziprasidone	22920393	Efficacy	yes	as measured by changes in PANSS-T (positive and negative syndrome scale total score), using a mixed model repeated measures approach. Examined 6789 SNPs - p-value of p< or equal to 5x10-4 was considered significant. It was unclear whether the allele was associated with an increased or decreased response to drug.	Allele A is associated with response to ziprasidone in people with Schizophrenia.	A			Is	Associated with		response to		in people with	Disease:Schizophrenia				0.46	0.72	0.54		0.58	0.46	0.613333	SNP sin predominancia en alguna población	rs17194378-A
981238803	981238808	retrospective	47		CATIE Study - a total of 18 months, patients were initially randomly assigned olanzapine, perphenazine, quetiapine, risperidone or ziprasidone.	Study Cohort					= 4.79E-4	Unknown				European	rs9585618	NALCN	ziprasidone	22920393	Efficacy	yes	as measured by changes in PANSS-T (positive and negative syndrome scale total score), using a mixed model repeated measures approach. Examined 6789 SNPs - p-value of p< or equal to 5x10-4 was considered significant. It was unclear whether the allele was associated with an increased or decreased response to drug.	Allele C is associated with response to ziprasidone in people with Schizophrenia.	C			Is	Associated with		response to		in people with	Disease:Schizophrenia				0.605	0.25	0.473		0.445	0.605	0.389333	SNP sin predominancia en alguna población	rs9585618-C
981239981	981239991	cohort	58		Plasma samples from epilepsy patients. 18 were taking just carbamazepine, and 40 were also taking other antiepileptic drugs.	Disease	0.453	C			= 0.0241	Unknown				East Asian	rs1051740	EPHX1	carbamazepine	15692831	Dosage, Metabolism/PK	yes		Allele C is associated with increased metabolism of carbamazepine in people with Epilepsy as compared to allele T.	C			Is	Associated with	increased	metabolism of		in people with	Disease:Epilepsy		T		0.625	0.336	0.309	0.215	0.323	0.42	0.322667	SNP sin predominancia en alguna población	rs1051740-C
981345436	981345449	clinical trial	375		subset of PEAR Trial (NCT00246519). Hypertension.	Disease					= 0.026	Unknown				Multiple groups, mostly Whites and Blacks.	rs2960306	GRK4	atenolol	22949529	Efficacy	yes	This decrease in response was only significant* when considered as part of a haplotype with rs1024323. The finding was that increasing copies of rs2960306T-rs1024323T haplotype were associated with significantly reduced atenolol-induced diastolic blood pressure lowering (-9.1±6.8 versus -6.8±7.1 versus -5.3±6.4 mm Hg in participants with 0, 1, and 2 copies respectively). Analysis of the SNP alone…	Allele T is associated with decreased response to atenolol in people with Hypertension as compared to allele G.	T			Is	Associated with	decreased	response to		in people with	Disease:Hypertension		G		0.652	0.394	0.34	0.48	0.359	0.566	0.364333	SNP sin predominancia en alguna población	rs2960306-T
981345450	981345461	clinical trial	378		subset of PEAR Trial(NCT00246519). Hypertension.	Disease					= 0.0088	Unknown				Multiple groups, mostly Whites and Blacks.	rs1024323	GRK4	atenolol	22949529	Efficacy	yes	This decrease in response was only significant* when considered as part of a haplotype with rs2960306. The finding was that increasing copies of rs2960306T-rs1024323T haplotype were associated with significantly reduced atenolol-induced diastolic blood pressure lowering (-9.1±6.8 versus -6.8±7.1 versus -5.3±6.4 mm Hg in participants with 0, 1, and 2 copies respectively). Analysis of the SNP alone…	Allele T is associated with decreased response to atenolol in people with Hypertension as compared to allele C.	T			Is	Associated with	decreased	response to		in people with	Disease:Hypertension		C		0.731	0.448	0.447	0.615	0.432	0.673	0.442333	SNP sin predominancia en alguna población	rs1024323-T
981352439	981352446	case/control	78	70	Rheumatoid Arthritis	Disease						Unknown				European	rs1061622	TNFRSF1B	infliximab	18565259	Efficacy	yes	Only the abstract of this article is available.	Allele G is associated with decreased response to infliximab in people with Arthritis, Rheumatoid as compared to allele T.	G			Is	Associated with	decreased	response to		in people with	Disease:Rheumatoid arthritis		T		0.577	0.166	0.176	0.175	0.164	0.376	0.168667	SNP sin predominancia en alguna población	rs1061622-G
981477559	981477566	clinical trial	70		Kidney Transplantation	Disease						Unknown				Unknown	rs7311358	SLCO1B3	mycophenolate mofetil	19890249	Metabolism/PK	yes	This association was found for the haplotype of 334T>G/699G>A (rs4149117G/rs7311358A). Patients were also treated with sirolimus or tacrolimus (results did not differ between these treatments so were pooled).	Allele A is associated with decreased clearance of mycophenolate mofetil in people with Kidney Transplantation as compared to allele G.	A			Is	Associated with	decreased	clearance of		in people with	Disease:Kidney Transplantation		G		0.7	0.813	0.888		0.83	0.7	0.843667	SNP sin predominancia en alguna población	rs7311358-A
981477583	981477588	cohort	172		Hepatitis C, Chronic	Disease					< 0.05	Unknown				East Asian	rs8105790	IFNL3	peginterferon alfa-2a, ribavirin	19749757	Efficacy	yes	The associated allele is not explicitly stated, so I assumed that the association was with the minor allele, and dbSNP lists C as the minor allele in Asians.	Allele C is associated with increased response to peginterferon alfa-2a and ribavirin in people with Hepatitis C, Chronic as compared to allele T.	C			Is	Associated with	increased	response to	and	in people with	Disease:Chronic hepatitis C virus infection		T		0.611	0.136	0.287	0.25	0.345	0.4305	0.256	SNP sin predominancia en alguna población	rs8105790-C
981477593	981477597	cohort	172		Hepatitis C, Chronic	Disease					< 0.05	Unknown				East Asian	rs11881222	IFNL3	peginterferon alfa-2a, ribavirin	19749757	Efficacy	yes	The associated allele is not explicitly stated, so I assumed that the association was with minor allele, and dbSNP lists G as the minor allele in Asians.	Allele G is associated with increased response to peginterferon alfa-2a and ribavirin in people with Hepatitis C, Chronic as compared to allele A.	G			Is	Associated with	increased	response to	and	in people with	Disease:Chronic hepatitis C virus infection		A		0.763	0.388	0.383			0.763	0.3855	SNP predominantes en ancestría africana	rs11881222-G
981477599	981477604	cohort	172		Hepatitis C, Chronic	Disease					< 0.05	Unknown				East Asian	rs8103142	IFNL3	peginterferon alfa-2a, ribavirin	19749757	Efficacy	yes	Actually, the associated allele is not stated, so I assumed that the association was with the minor allele, but it is not clear from dbSNP which is the minor allele in Asians.	Allele C is associated with increased response to peginterferon alfa-2a and ribavirin in people with Hepatitis C, Chronic as compared to allele T.	C			Is	Associated with	increased	response to	and	in people with	Disease:Chronic hepatitis C virus infection		T		0.778	0.429	0.426	0.7		0.739	0.4275	SNP sin predominancia en alguna población	rs8103142-C
981477606	981477609	cohort	172		Hepatitis C, Chronic	Disease					< 0.05	Unknown				East Asian	rs28416813	IFNL3	peginterferon alfa-2a, ribavirin	19749757	Efficacy	yes	Actually, the associated allele is not stated, so I assumed that the association was with the minor allele, but it is not clear from dbSNP which is the minor allele in Asians.	Allele C is associated with increased response to peginterferon alfa-2a and ribavirin in people with Hepatitis C, Chronic as compared to allele G.	C			Is	Associated with	increased	response to	and	in people with	Disease:Chronic hepatitis C virus infection		G		0.22	0.59	0.59	0.39		0.305	0.59	SNP sin predominancia en alguna población	rs28416813-C
981477611	981477613	cohort	172		Hepatitis C, Chronic	Disease					< 0.05	Unknown				East Asian	rs4803219	IFNL3	peginterferon alfa-2a, ribavirin	19749757	Efficacy	yes	Actually, the associated allele is not stated, so I assumed that association was with the minor allele, but it is not clear from dbSNP which is the minor allele in Asians.	Allele C is associated with increased response to peginterferon alfa-2a and ribavirin in people with Hepatitis C, Chronic as compared to allele T.	C			Is	Associated with	increased	response to	and	in people with	Disease:Chronic hepatitis C virus infection		T			0.75	0.63				0.69	SNP sin predominancia en alguna población	rs4803219-C
981477615	981477618	cohort	172		Hepatitis C, Chronic	Disease					< 0.05	Unknown				East Asian	rs7248668	IFNL3	peginterferon alfa-2a, ribavirin	19749757	Efficacy	yes	The associated allele is not explicitly stated, so I assumed that the association was with minor allele, and dbSNP lists A as the minor allele in Asians.	Allele A is associated with increased response to peginterferon alfa-2a and ribavirin in people with Hepatitis C, Chronic as compared to allele G.	A			Is	Associated with	increased	response to	and	in people with	Disease:Chronic hepatitis C virus infection		G		0.5	0.088	0.271	0.09	0.323	0.295	0.227333	SNP sin predominancia en alguna población	rs7248668-A
981478035	981478069	cohort	37		pediatric ALL	Disease					= 0.021	Unknown				European	rs10994982	ARID5B	methotrexate	19684603	Metabolism/PK	yes	A was associated with greater methotrexate polyglutamate accumulation in lymphoblasts from patients with B-hyperdiploid ALL.	Allele A is associated with decreased clearance of methotrexate in children with Precursor Cell Lymphoblastic Leukemia-Lymphoma as compared to allele G.	A	Pediatric		Is	Associated with	decreased	clearance of		in children with	Disease:Acute lymphoblastic leukemia		G		0.34	0.69	0.51	0.53	0.52	0.435	0.573333	SNP sin predominancia en alguna población	rs10994982-A
981479989	981479995	cohort, clinical trial, prospective	1886		CAP (NCT00451828) and PRINCE trials.	Study Cohort					= 0.01	Unknown				Multiple groups, CAP: White; PRINCE: African American and Caucasian	rs11716445	RHOA	pravastatin, simvastatin	23166513	Efficacy	yes	The associated effect was on LDL Cholesterol and explained less than 1% of the variation.	Allele A is associated with decreased response to pravastatin or simvastatin in people with Hypercholesterolemia as compared to allele G.	A			Is	Associated with	decreased	response to	or	in people with	Disease:Hypercholesterolemia		G		0.5	0.039	0.074	0.02	0.062	0.26	0.0583333	SNP sin predominancia en alguna población	rs11716445-A
981481812	981481825	case/control, GWAS, retrospective	701	807	Patients on warfarin who were in the Biobank Japan project.; Frequencies are for high-dose requirers(cases) vs low-dose(controls).	Study Cohort	0.331	T	0.261	T		Unknown				East Asian	rs2108622	CYP4F2	warfarin	20833655	Dosage, Efficacy	yes	The association was not significant in a GWAS comparing high and low-dose warfarin requirers, but was significant after results were first stratified by rs10509680 (CYP2C9) and rs9923231 (VKORC1) genotypes.	Allele T is associated with increased dose of warfarin as compared to allele C.	T			Is	Associated with	increased	dose of					C		0.556	0.275	0.282	0.075	0.278	0.3155	0.278333	SNP sin predominancia en alguna población	rs2108622-T
981481830	981481837	cohort	440		Patients on warfarin who were in the Biobank Japan project.; Frequencies are for high-dose requirers(cases) vs low-dose(controls).	Study Cohort	0.272	T			< 0.05	Unknown				East Asian	rs2108622	CYP4F2	warfarin	20833655	Dosage, Efficacy	yes	This was a replication cohort. Results were first stratified by rs10509680 (CYP2C9) and rs9923231 (VKORC1) genotypes.	Allele T is associated with increased dose of warfarin as compared to allele C.	T			Is	Associated with	increased	dose of					C		0.556	0.275	0.282	0.075	0.278	0.3155	0.278333	SNP sin predominancia en alguna población	rs2108622-T
981483656	1451401590	meta-analysis	1978		P-value given for meta-analysis in 1279 COG patients and 699 St Jude patients	Study Cohort					= 5.72E-19					Multiple groups	rs4149056	SLCO1B1	methotrexate	23233662	Efficacy, Toxicity, Metabolism/PK	yes	Average clearance was about 13% lower in CC than in TT patients.	Allele C is associated with decreased clearance of methotrexate in children with Precursor Cell Lymphoblastic Leukemia-Lymphoma as compared to allele T.	C	Pediatric		Is	Associated with	decreased	clearance of		in children with	Disease:Acute lymphoblastic leukemia		T		0.5	0.188	0.181	0.045	0.192	0.2725	0.187	SNP sin predominancia en alguna población	rs4149056-C
981483665	1451401540	meta-analysis	1978		P-value given for meta analysis in 1279 COG patients and 699 St Jude patients	Study Cohort					= 3.97E-11					Multiple groups	rs2306283	SLCO1B1	methotrexate	23233662	Efficacy, Toxicity, Metabolism/PK	yes	This association was found in patients already stratified for rs4149056 genotype.	Allele A is associated with decreased clearance of methotrexate in children with Precursor Cell Lymphoblastic Leukemia-Lymphoma as compared to allele G.	A	Pediatric		Is	Associated with	decreased	clearance of		in children with	Disease:Acute lymphoblastic leukemia		G		0.13	0.49	0.52	0.23		0.18	0.505	SNP sin predominancia en alguna población	rs2306283-A
981483686	1451401591	meta-analysis			P-value given for meta-analysis in 1279 COG patients and 699 St Jude patients	Study Cohort					= 3.13E-19					Multiple groups	rs11045879	SLCO1B1	methotrexate	23233662	Efficacy, Toxicity, Metabolism/PK	yes		Allele C is associated with decreased clearance of methotrexate in children with Precursor Cell Lymphoblastic Leukemia-Lymphoma as compared to allele T.	C	Pediatric		Is	Associated with	decreased	clearance of		in children with	Disease:Acute lymphoblastic leukemia		T		0.571	0.14	0.197		0.234	0.571	0.190333	SNP sin predominancia en alguna población	rs11045879-C
981483693	1451401585	meta-analysis	1978		P-value given for meta-analysis in 1279 COG patients and 699 St Jude patients	Study Cohort					= 9.74E-19					Multiple groups	rs4149081	SLCO1B1	methotrexate	23233662	Efficacy, Toxicity, Metabolism/PK	yes		Allele A is associated with decreased clearance of methotrexate in children with Precursor Cell Lymphoblastic Leukemia-Lymphoma as compared to allele G.	A	Pediatric		Is	Associated with	decreased	clearance of		in children with	Disease:Acute lymphoblastic leukemia		G		0.571	0.125	0.197	0.17	0.229	0.3705	0.183667	SNP sin predominancia en alguna población	rs4149081-A
981483700	1451401620	meta-analysis	1978		P-value given for meta-analysis in 1279 COG patients and 699 St Jude patients	Study Cohort					= 5.59E-12					Multiple groups	rs11045821	SLCO1B1	methotrexate	23233662	Efficacy, Toxicity, Metabolism/PK	yes		Allele A is associated with decreased clearance of methotrexate in children with Precursor Cell Lymphoblastic Leukemia-Lymphoma as compared to allele G.	A	Pediatric		Is	Associated with	decreased	clearance of		in children with	Disease:Acute lymphoblastic leukemia		G			0.018	0.138		0.087		0.081	SNP sin predominancia en alguna población	rs11045821-A
981483776	981483783	cohort	93		Patients had been receiving clozapine for at least 6 months, and were excluded if they were also receiving CYP1A2 inhibitors or other antipsychotics such as haloperidol. p-value listed is after correction for multiple testing.	Study Cohort	0.419	A			= 0.036	OR	4.87	1.78	13.3	East Asian	rs7787082	ABCB1	clozapine	22722500	Efficacy	yes	Drug response was assessed using Clinical Global Impressions - Improvement (CGI-I) scores. Patients were classified as responders (CGI-I score of 1 or 2) or non-responders (CGI-I score greater than 3). The G allele was more frequently observed in non-responders than in responders. Please note this SNP is in linkage disequilibrium with rs10248420 (r-squared = 0.911).	Allele G is associated with decreased response to clozapine in people with Schizophrenia as compared to allele A.	G			Is	Associated with	decreased	response to		in people with	Disease:Schizophrenia		A		0.29	0.89	0.73	0.54	0.76	0.415	0.793333	SNP predominantes en ancestría europea	rs7787082-G
981483784	981483791	cohort	89		Patients had been receiving clozapine for at least 6 months, and were excluded if they were also receiving CYP1A2 inhibitors or other antipsychotics such as haloperidol. p-value listed is after correction for multiple testing.	Study Cohort	0.567	A			= 0.046	OR	4.1	1.59	10.55	East Asian	rs10248420	ABCB1	clozapine	22722500	Efficacy	yes	Drug response was assessed using Clinical Global Impressions - Improvement (CGI-I) scores. Patients were classified as responders (CGI-I score of 1 or 2) or non-responders (CGI-I score greater than 3). The A allele was more frequently observed in non-responders than in responders. Please note this SNP is in linkage disequilibrium with rs7787082 (r-squared = 0.911).	Allele A is associated with decreased response to clozapine in people with Schizophrenia as compared to allele G.	A			Is	Associated with	decreased	response to		in people with	Disease:Schizophrenia		G		0.33	0.95	0.74		0.76	0.33	0.816667	SNP predominantes en ancestría europea	rs10248420-A
981483844	981483849	cohort	316		daily smokers	Study Cohort	0.17	C			= 0.041	Unknown				Multiple groups, 79.6% Caucasian;8.8% Hispanic;3.3% Asian;2.8% African-American; 5.2% undisclosed. Subjects were from the Denver/Boulder, CO metropolitan area. About half the samples were from unrelated individuals and the other half were dizygotic twin and sib-pairs.	rs2229959	CHRNA4	nicotine	20854418	Other	yes	Response(sweating, heart pounding and nausea) to the first experimental cigarette was measured using the NEQ(nicotine effects scale).	Allele C is associated with increased response to nicotine in people with daily smoking as compared to allele A.	C			Is	Associated with	increased	response to		in people with	Other:daily smoking		A		0.4	0.15	0.13			0.4	0.14	SNP sin predominancia en alguna población	rs2229959-C
981483940	981483947	cohort, prospective	99		Parkinson's Disease. age 55 and older.	Disease	0.36	C			= 0.017	Unknown		0.064	0.62	European	rs622342	SLC22A1	amantadine, Anticholinergics, levodopa, selegiline	20680652	Dosage, Efficacy	yes	For each copy of the C allele, between the first and fifth levodopa prescriptions, the sum of the prescribed doses of all anti-Parkinsonian drugs were 0.34 defined daily dose higher (There was no change seen for the doses of dopamine agonists.)	Allele C is associated with increased dose of amantadine, Anticholinergics, levodopa or selegiline in people with Parkinson Disease.	C			Is	Associated with	increased	dose of	or	in people with	Disease:Parkinson Disease				0.07	0.43	0.48	0.21	0.38	0.14	0.43	SNP sin predominancia en alguna población	rs622342-C
981500777	981500784	case/control, meta-analysis	1944	908	Mood Disorders: Major Depressive Disorder and/or Bipolar Disorder and/or dysthymia. 4 studies included.	Disease					= 0.01	OR	1.28	1.06	1.53	Multiple groups	rs4713916	FKBP5	citalopram, fluoxetine, mirtazapine, paroxetine, Selective serotonin reuptake inhibitors, venlafaxine	20709156	Efficacy	yes	One of the studies included in this meta-analysis was a "Naturalistic pharmacogenetic study".	Allele A is associated with increased response to citalopram, fluoxetine, mirtazapine, paroxetine, Selective serotonin reuptake inhibitors or venlafaxine in people with Mood Disorders as compared to allele G.	A			Is	Associated with	increased	response to	or	in people with	Disease:Mood Disorder		G		0.12	0.4	0.27	0.06		0.09	0.335	SNP sin predominancia en alguna población	rs4713916-A
981501152	981501158				Schizophrenic	Disease					= 0.042	Unknown				Unknown	rs2740204	OXT	clozapine	20196918	Efficacy	yes	Full-text was not accessible. Associated allele is unclear. It was described as the "variant". I interpreted this to be T, since authors are Canadian so patients are probably White, and dbSNP shows T to be the minor allele in Whites.	Allele T is associated with increased response to clozapine in people with Schizophrenia as compared to allele G.	T			Is	Associated with	increased	response to		in people with	Disease:Schizophrenia		G		0.5	0.167	0.388	0.265	0.419	0.3825	0.324667	SNP sin predominancia en alguna población	rs2740204-T
981501160	981501168	cohort, case series	100		newly diagnosed with type 2 diabetes.	Disease	0.35	T			= 0.013	Unknown				East Asian	rs10494366	NOS1AP	repaglinide	20305679	Dosage, Efficacy	yes	TT subjects had more serious insulin resistance at baseline, but had increased response (HOMA-IR) to repaglinide than TG and GG subjects. TG subjects had a lesser response, while GG subjects had an increase in HOMA-IR after treatments.	Allele T is associated with increased response to repaglinide in people with Diabetes Mellitus, Type 2 as compared to allele G.	T			Is	Associated with	increased	response to		in people with	Disease:Diabetes Mellitus, Type 2		G		0.725	0.354	0.511	0.36	0.574	0.5425	0.479667	SNP sin predominancia en alguna población	rs10494366-T
981501851	981501858	cohort	88		Whole cohort: African Americans and Caucasians. An exploratory study therefore they did not correct for multiple testing.	Study Cohort					= 0.04	Unknown				Multiple groups, African Americans and Caucasians	rs7643645	NR1I2	carbamazepine	23252947	Metabolism/PK	yes	This association was significant in the whole cohort. As measured by a higher carbamazepine-10-11 epoxide: carbamazepine ratio.	Allele G is associated with increased metabolism of carbamazepine in people with Epilepsy as compared to allele A.	G			Is	Associated with	increased	metabolism of		in people with	Disease:Epilepsy		A		0.5	0.176	0.42	0.215	0.443	0.3575	0.346333	SNP sin predominancia en alguna población	rs7643645-G
981501862	981501869	cohort	88		Whole cohort: African Americans and Caucasians. An exploratory study therefore they did not correct for multiple testing.	Study Cohort					= 0.006	Unknown				Multiple groups, African Americans and Caucasians	rs2461817	NR1I2	carbamazepine	23252947	Metabolism/PK	yes	This association was significant in the whole cohort. As measured by a higher carbamazepine-10-11 epoxide: carbamazepine ratio. However, Allele C was associated with decreased clearance in African American patients (p=0.03, n=30).	Allele C is associated with increased metabolism of carbamazepine in people with Epilepsy as compared to allele A.	C			Is	Associated with	increased	metabolism of		in people with	Disease:Epilepsy		A		0.694	0.167	0.5			0.694	0.3335	SNP sin predominancia en alguna población	rs2461817-C
981501871	981501878	cohort	88		Whole cohort: African Americans and Caucasians. An exploratory study therefore they did not correct for multiple testing.	Study Cohort					= 0.04	Unknown				Multiple groups, African Americans and Caucasians	rs4688040	NR1I2	carbamazepine	23252947	Metabolism/PK	yes	This association was significant in the whole cohort. As measured by a higher carbamazepine-10-11 epoxide: carbamazepine ratio.	Allele T is associated with increased metabolism of carbamazepine in people with Epilepsy as compared to allele G.	T			Is	Associated with	increased	metabolism of		in people with	Disease:Epilepsy		G		0.583	0.113	0.372		0.382	0.583	0.289	SNP sin predominancia en alguna población	rs4688040-T
981501880	981501886	cohort	30		An exploratory study therefore they did not correct for multiple testing.	Study Cohort					= 0.04	Unknown				African American/Afro-Caribbean	rs3814055	NR1I2	carbamazepine	23252947	Metabolism/PK	yes	This association was only significant in the African American patients and not in Caucasian patients.	Allele T is associated with decreased clearance of carbamazepine in people with Epilepsy as compared to allele C.	T			Is	Associated with	decreased	clearance of		in people with	Disease:Epilepsy		C		0.615	0.214	0.431	0.31	0.382	0.4625	0.342333	SNP sin predominancia en alguna población	rs3814055-T
981502104	981502110	clinical trial, GWAS	127		Schizophrenia patients from CATIE(Clinical Antipsychotic Trials of Intervention Effectiveness).	Disease	0.051	A			= 0.034	Unknown				Multiple groups, White/European American; Black/African American; other	rs286913	EHF	ziprasidone	21107309	Dosage, Efficacy	yes	Adjacent SNPs also showed evidence for association. The report is that the minor allele is associated with greater response, and dbSNP shows A to be the minor allele in all populations reported upon.	Allele A is associated with increased response to ziprasidone in people with Schizophrenia as compared to allele G.	A			Is	Associated with	increased	response to		in people with	Disease:Schizophrenia		G		0.12	0	0.04	0.04	0.05	0.08	0.03	SNP sin predominancia en alguna población	rs286913-A
981502111	981502116	clinical trial, GWAS	213		Schizophrenia patients from CATIE(Clinical Antipsychotic Trials of Intervention Effectiveness).	Disease	0.191	A			= 0.068	Unknown				Multiple groups, White/European American; Black/African American; other	rs11240594	SLC26A9	olanzapine	21107309	Dosage, Efficacy	yes	Adjacent SNPs also showed evidence for association. Associated allele is not clear; it is reported as the minor allele being associated with greater response. dbSNP shows A to generally be the minor allele, but this is not the case in all populations. Most of the study participants were of White or Black ancestry (for which A is reported to be the minor allele), but only a study subset was genoty…	Allele A is associated with increased response to olanzapine in people with Schizophrenia as compared to allele G.	A			Is	Associated with	increased	response to		in people with	Disease:Schizophrenia		G		0.647	0.183	0.176		0.197	0.647	0.185333	SNP sin predominancia en alguna población	rs11240594-A
981502125	981502131	cohort	160		Schizophrenia	Disease					= 0.00404	OR	2.866	1.536	5.348	East Asian	rs2975226	SLC6A3	clozapine	20580759	Dosage, Efficacy	yes	This is reported as T being the allele associated with responsiveness. Reporting seems to be done with respect to the gene, which is on the negative chr. strand, so I am reporting A on the positive strand to be the associated one, but there is potential for confusion of alleles.	Allele A is associated with increased response to clozapine in people with Schizophrenia as compared to allele T.	A			Is	Associated with	increased	response to		in people with	Disease:Schizophrenia		T		0.35	0.74	0.44			0.35	0.59	SNP sin predominancia en alguna población	rs2975226-A
981502225	981502279	cohort	165		p-value quoted is for association with increased frequency of the G allele in responders, after Bonferroni correction for multiple testing.	Study Cohort					= 0.017	OR	2.403			East Asian	rs495794	SRP19	citalopram, fluoxetine, paroxetine, sertraline	22795047	Efficacy	yes	Response to the four antidepressants was measured by the Hamilton Rating Scale for Depression (HAMD). "Responders" were defined as patients with at least a 50% reduction in HAMD total score after 6 weeks of treatment. The G allele was significantly more frequent in responders than in non-responders. Additionally, carriers of the G allele had a greater reduction in HAMD scores after 6 weeks of tre…	Allele G is associated with increased response to citalopram, fluoxetine, paroxetine or sertraline in people with Depressive Disorder, Major as compared to allele A.	G			Is	Associated with	increased	response to	or	in people with	Disease:Major Depressive Disorder		A		0.588	0.5	0.601			0.588	0.5505	SNP sin predominancia en alguna población	rs495794-G
981502232	981502238	cohort	165		p-value quoted is for the association of the A allele with a greater reduction in HAMD scores, after Bonferroni correction for multiple testing.	Study Cohort					= 0.0089	Unknown				East Asian	rs153549	REEP5	citalopram, fluoxetine, paroxetine, sertraline	22795047	Efficacy	yes	Response to the four antidepressants was measured by the Hamilton Rating Scale for Depression (HAMD). "Responders" were defined as patients with at least a 50% reduction in HAMD total score after 6 weeks of treatment. The A allele was significantly more frequent in responders than in non-responders. Additionally, carriers of the A allele had a greater reduction in HAMD scores after 6 weeks of tre…	Allele A is associated with increased response to citalopram, fluoxetine, paroxetine or sertraline in people with Depressive Disorder, Major as compared to allele G.	A			Is	Associated with	increased	response to	or	in people with	Disease:Major Depressive Disorder		G		0.17	0.71	0.47		0.51	0.17	0.563333	SNP sin predominancia en alguna población	rs153549-A
981502239	981502245	cohort	165		p-value quoted is for the association of the G allele with a greater reduction in HAMD scores, after Bonferroni correction for multiple testing.	Study Cohort					= 0.0036	Unknown				East Asian	rs153560	REEP5	citalopram, fluoxetine, paroxetine, sertraline	22795047	Efficacy	yes	Response to the four antidepressants was measured by the Hamilton Rating Scale for Depression (HAMD). "Responders" were defined as patients with at least a 50% reduction in HAMD total score after 6 weeks of treatment. The G allele was significantly more frequent in responders than in non-responders. Additionally, carriers of the G allele had a greater reduction in HAMD scores after 6 weeks of tre…	Allele G is associated with increased response to citalopram, fluoxetine, paroxetine or sertraline in people with Depressive Disorder, Major as compared to allele A.	G			Is	Associated with	increased	response to	or	in people with	Disease:Major Depressive Disorder		A		0.12	0.62	0.42		0.44	0.12	0.493333	SNP sin predominancia en alguna población	rs153560-G
981502588	981502592	cohort	116		Schizophrenia	Disease						Unknown				European	rs25531	SLC6A4	clozapine	20452607	Efficacy	yes	An association was found when rs25531 was considered in combination with the "Long" and "Short" alleles of rs4795541. rs25531 subdivides "Long" into La and Lg. Lg + S were grouped together into group S'. Nonresponders to clozapine showed a higher frequency of S'-allele (P = 0.01) and also were more likely to be S'/S' homozygous or S'/La heterozygous than those who did respond (OR = 3.15; 95% CI 1…	Allele T is associated with response to clozapine in people with Schizophrenia.	T			Is	Associated with		response to		in people with	Disease:Schizophrenia				0.5		0.96			0.5	0.96	SNP sin predominancia en alguna población	rs25531-T
981505272	981505283	cohort	61			Unknown	0.43	T			= 0.03	Unknown				European	rs1544410	VDR	midazolam	22484315	Metabolism/PK	yes	CC > CT > TT.	Allele C is associated with increased clearance of midazolam as compared to allele T.	C			Is	Associated with	increased	clearance of					T		0.42	0.81	0.75	0.72	0.71	0.57	0.756667	SNP sin predominancia en alguna población	rs1544410-C
981505339	981505345	cohort	55			Unknown	0.57	T			= 0.04	Unknown				European	rs4516035	VDR	midazolam	22484315	Metabolism/PK	yes	TT > TC > CC.	Allele T is associated with increased clearance of midazolam as compared to allele C.	T			Is	Associated with	increased	clearance of					C		0.5	0.64	0.71	0.96	0.68	0.73	0.676667	SNP sin predominancia en alguna población	rs4516035-T
981750318	981750324	cohort, prospective	160		Bipolar Disorder	Disease					< 0.05	OR	3.56	1.18	10.76	European	rs2314339	NR1D1, THRA	lithium	20348464	Efficacy	yes	Authors note that the comparison by genotype(CT+TT vs CC) rather than by allele was not significant after Bonferroni correction. OR listed below is for non-improvement or worsening in carriers of the T allele.	Allele T is associated with decreased response to lithium in people with Bipolar Disorder as compared to allele C.	T			Is	Associated with	decreased	response to		in people with	Disease:Bipolar Disorder		C		0.55	0.244	0.287	0.25	0.262	0.4	0.264333	SNP sin predominancia en alguna población	rs2314339-T
981750833	981750842	cohort	515		Daily smokers which were a subset of cases and controls from the Health2000 Study (a Metabolic Syndrome GWAS).	Study Cohort	0.34	A			= 4.7E-5	Unknown				European	rs1051730	CHRNA3	nicotine	19628476	Metabolism/PK	yes	Serum Cotinine levels were measured to test for association between nicotine intake and this SNP. AA>AG>GG for serum cotinine levels in daily smokers. Authors noted that the variance was very high (R-squared = 4.3%). Effect size of this SNP was 0.30 . Cigarettes per day was also associated but not significantly so after correction for multiple testing.	Allele A is associated with increased dose of nicotine as compared to allele G.	A			Is	Associated with	increased	dose of					G		0.5	0.244	0.356	0.135		0.3175	0.3	SNP sin predominancia en alguna población	rs1051730-A
981754640	981754645	case/control	102		Major Depression	Disease					< 0.05	Unknown				European	rs948854	GAL	antidepressants, benzodiazepine derivatives, mirtazapine, Selective serotonin reuptake inhibitors	20237460	Efficacy	yes	This was specific to premenopausal women(not seen in postmenopausal women or in men). The same allele was associated with more severe vegetative but not cognitive depressive symptoms. Patients were on a variety of therapies, with the three largest groups being SSRIs,Tricyclics, and Mirtazapine.	Allele C is associated with decreased response to antidepressants, benzodiazepine derivatives, mirtazapine or Selective serotonin reuptake inhibitors in women Depressive Disorder, Major as compared to allele T.	C			Is	Associated with	decreased	response to	or	in women	Disease:Major Depressive Disorder		T		0.32	0.44	0.32		0.28	0.32	0.346667	SNP sin predominancia en alguna población	rs948854-C
981754840	981754850	cohort	107		Majority were valve replacement patients (76%)	Disease	0.49	A			< 0.001	Unknown				Near Eastern	rs9923231	VKORC1	warfarin	23061746	Dosage	yes	Comparison between GG, GA and AA was significant as was GG compared to GA and GG to AA. Please note that alleles have been complemented to the positive strand, based on comparison of allele frequencies in the paper and those available on dbSNP.	Allele T is associated with decreased dose of warfarin.	T			Is	Associated with	decreased	dose of							0.5	0.326	0.42	0.145	0.377	0.3225	0.374333	SNP sin predominancia en alguna población	rs9923231-T
981755699	981755707		6		In vitro assays with Fisher rat thyroid cells expressing the human G551D CFTR mutation (rs75527207 allele A), using Ussing chambers for cell-based fluorescence membrane potential assays. Compared to forskolin only activated cells, ivacaftor potentiated G551D CFTR activity.	Study Cohort					< 0.05	Unknown				Unknown	rs75527207	CFTR	ivacaftor	19846789	Efficacy	yes	In vitro assays that show ivacaftor potentiates CFTR with the G551D mutation (rs75527207 allele A) - see details described in study parameters.	Allele A is associated with increased response to ivacaftor.	A			Is	Associated with	increased	response to										0		0		SNP sin predominancia en alguna población	rs75527207-A
981755787	981755793				In vitro assays. Responses measured: channel open probability, single channel current amplitude at 80mV, chloride transport.	Study Cohort					< 0.05	Unknown				Unknown	rs75527207	CFTR	ivacaftor	22293084	Efficacy	yes	as compared to baseline. In vitro assays using transfected Fisher Rat Thyroid cells expressing CFTR. Before treatment, cells were activated by exposure to PKA and ATP before ivacaftor treatment. In vitro assays using transfected Fisher Rat Thyroid cells expressing CFTR. Cells expressing G551D-CFTR (rs75527207 allele A) responded to ivacaftor treatment with a significantly enhanced channel open pr…	Allele A is associated with increased response to ivacaftor.	A			Is	Associated with	increased	response to										0		0		SNP sin predominancia en alguna población	rs75527207-A
981861796	981861803	cohort	373		Chronic Hepatitis C	Disease					= 0.0489	RR	0.78	0.62	1	European	rs1800797	IL6	peginterferon alfa-2a	19387461	Efficacy	yes	This association is as part of a haplotype which also includes rs1800796G and rs1800795G.	Allele G is associated with decreased response to peginterferon alfa-2a in people with Hepatitis C, Chronic as compared to allele A.	G			Is	Associated with	decreased	response to		in people with	Disease:Chronic hepatitis C virus infection		A		0.941	0.875	0.723	0.95	0.787	0.9455	0.795	SNP sin predominancia en alguna población	rs1800797-G
981861804	981861809	cohort	373		Chronic Hepatitis C	Disease					= 0.0489	RR	0.78	0.62	1	European	rs1800796	IL6	peginterferon alfa-2a	19387461	Efficacy	yes	This association is as part of a haplotype which also includes rs1800797G and rs1800795G. This is a GC SNP so the listed associated allele may be incorrect.	Allele G is associated with decreased response to peginterferon alfa-2a in people with Hepatitis C, Chronic as compared to allele C.	G			Is	Associated with	decreased	response to		in people with	Disease:Chronic hepatitis C virus infection		C		0.5	0.89	0.79	0.81	0.79	0.655	0.823333	SNP sin predominancia en alguna población	rs1800796-G
981861811	981861816	cohort	373		Chronic Hepatitis C	Disease					= 0.0489	RR	0.78	0.62	1	European	rs1800795	IL6	peginterferon alfa-2a	19387461	Efficacy	yes	This association is as part of a haplotype which also includes rs1800797G and rs1800796G. This is a GC SNP so the listed associated allele may be incorrect.	Allele G is associated with decreased response to peginterferon alfa-2a in people with Hepatitis C, Chronic as compared to allele C.	G			Is	Associated with	decreased	response to		in people with	Disease:Chronic hepatitis C virus infection		C		0.941	0.753	0.713	0.95	0.217	0.9455	0.561	SNP sin predominancia en alguna población	rs1800795-G
981862151	981862159	cohort	197		cancer patients receiving oral morphine for pain. This cohort was also studied in PMID:15927391.	Disease	0.47	G			= 0.055	Unknown				European	rs2075507	COMT	morphine	19094200	Dosage, Efficacy	yes	This was for alleviation of pain from cancer. The association was as part of a haplotype consisting of 11 rsIDs (the other rsIDs are rs737866,rs7287550, rs5746849, rs740603, rs6269, rs2239393, rs4818, rs4680, rs174699, rs165728). The haplotype was associated with a dose reduction factor of 0.71 . Authors state that because the SNPs are linked, a strict Bonferroni correction is too conservative; h…	Allele G is associated with decreased dose of morphine in people with Neoplasms as compared to allele A.	G			Is	Associated with	decreased	dose of		in people with	Disease:Neoplasms		A		0.26	0.57	0.35	0.32		0.29	0.46	SNP sin predominancia en alguna población	rs2075507-G
981862160	981862166	cohort	197		cancer patients receiving oral morphine for pain. This cohort was also studied in PMID:15927391.	Disease	0.78	T			= 0.055	Unknown				European	rs737866	COMT	morphine	19094200	Dosage, Efficacy	yes	This was for alleviation of pain from cancer. The association was as part of a haplotype consisting of 11 rsIDs (the other rsIDs are rs2075507,rs7287550, rs5746849, rs740603, rs6269, rs2239393, rs4818, rs4680, rs174699, rs165728). The haplotype was associated with a dose reduction factor of 0.71 . Authors state that because the SNPs are linked, a strict Bonferroni correction is too conservative; …	Allele T is associated with decreased dose of morphine in people with Neoplasms as compared to allele C.	T			Is	Associated with	decreased	dose of		in people with	Disease:Neoplasms		C		0.45	0.82	0.76	0.88	0.79	0.665	0.79	SNP sin predominancia en alguna población	rs737866-T
981862168	981862174	cohort	197		cancer patients receiving oral morphine for pain. This cohort was also studied in PMID:15927391.	Disease	0.72	C			= 0.055	Unknown				European	rs7287550	COMT, TXNRD2	morphine	19094200	Dosage, Efficacy	yes	This was for alleviation of pain from cancer. The association was as part of a haplotype consisting of 11 rsIDs (the other rsIDs are rs2075507,rs737866, rs5746849, rs740603, rs6269, rs2239393, rs4818, rs4680, rs174699, rs165728). The haplotype was associated with a dose reduction factor of 0.71 . Authors state that because the SNPs are linked, a strict Bonferroni correction is too conservative; h…	Allele C is associated with decreased dose of morphine in people with Neoplasms as compared to allele T.	C			Is	Associated with	decreased	dose of		in people with	Disease:Neoplasms		T		0.609	0.225	0.41			0.609	0.3175	SNP sin predominancia en alguna población	rs7287550-C
981862176	981862183	cohort	197		cancer patients receiving oral morphine for pain. This cohort was also studied in PMID:15927391.	Disease	0.57	A			= 0.055	Unknown				European	rs5746849	COMT	morphine	19094200	Dosage, Efficacy	yes	This was for alleviation of pain from cancer. The association was as part of a haplotype consisting of 11 rsIDs (the other rsIDs are rs2075507,rs7287550, rs737866, rs740603, rs6269, rs2239393, rs4818, rs4680, rs174699, rs165728). The haplotype was associated with a dose reduction factor of 0.71 . Authors state that because the SNPs are linked, a strict Bonferroni correction is too conservative; h…	Allele A is associated with decreased dose of morphine in people with Neoplasms as compared to allele G.	A			Is	Associated with	decreased	dose of		in people with	Disease:Neoplasms		G		0.33	0.59	0.48			0.33	0.535	SNP sin predominancia en alguna población	rs5746849-A
981862185	981862192	cohort	197		cancer patients receiving oral morphine for pain. This cohort was also studied in PMID:15927391.	Disease	0.56	A			= 0.055	Unknown				European	rs740603	COMT	morphine	19094200	Dosage, Efficacy	yes	This was for alleviation of pain from cancer. The association was as part of a haplotype consisting of 11 rsIDs (the other rsIDs are rs2075507,rs7287550, rs5746849, rs737866, rs6269, rs2239393, rs4818, rs4680, rs174699, rs165728). The haplotype was associated with a dose reduction factor of 0.71 . Authors state that because the SNPs are linked, a strict Bonferroni correction is too conservative; …	Allele A is associated with decreased dose of morphine in people with Neoplasms as compared to allele G.	A			Is	Associated with	decreased	dose of		in people with	Disease:Neoplasms		G		0.33	0.66	0.48		0.5	0.33	0.546667	SNP sin predominancia en alguna población	rs740603-A
981862194	981862201	cohort	197		cancer patients receiving oral morphine for pain. This cohort was also studied in PMID:15927391.	Disease	0.62	A			= 0.055	Unknown				European	rs6269	COMT	morphine	19094200	Dosage, Efficacy	yes	This was for alleviation of pain from cancer. The association was as part of a haplotype consisting of 11 rsIDs (the other rsIDs are rs2075507,rs7287550, rs5746849, rs737866, rs6269, rs740603, rs4818, rs4680, rs174699, rs165728). The haplotype was associated with a dose reduction factor of 0.71 . Authors state that because the SNPs are linked, a strict Bonferroni correction is too conservative; h…	Allele A is associated with decreased dose of morphine in people with Neoplasms as compared to allele G.	A			Is	Associated with	decreased	dose of		in people with	Disease:Neoplasms		G		0.35	0.63	0.62	0.67	0.66	0.51	0.636667	SNP sin predominancia en alguna población	rs6269-A
981862203	981862216	cohort	197		cancer patients receiving oral morphine for pain. This cohort was also studied in PMID:15927391.	Disease	0.56	A			= 0.055	Unknown				European	rs4680	COMT	morphine	19094200	Dosage, Efficacy	yes	This was for alleviation of pain from cancer. The association was as part of a haplotype consisting of 11 rsIDs (the other rsIDs are rs2075507,rs7287550, rs5746849, rs737866, rs6269, rs2239393, rs4818, rs740603, rs174699, rs165728). The haplotype was associated with a dose reduction factor of 0.71 . Authors state that because the SNPs are linked, a strict Bonferroni correction is too conservative…	Allele A is associated with decreased dose of morphine in people with Neoplasms as compared to allele G.	A			Is	Associated with	decreased	dose of		in people with	Disease:Neoplasms		G		0.567	0.373	0.362	0.31	0.399	0.4385	0.378	SNP sin predominancia en alguna población	rs4680-A
981862218	981862232	cohort	197		cancer patients receiving oral morphine for pain. This cohort was also studied in PMID:15927391.	Disease	0.63	C			= 0.055	Unknown				European	rs4818	COMT	morphine	19094200	Dosage, Efficacy	yes	This was for alleviation of pain from cancer. The association was as part of a haplotype consisting of 11 rsIDs (the other rsIDs are rs2075507,rs7287550, rs5746849, rs737866, rs6269, rs2239393, rs740603, rs4680, rs174699, rs165728). The haplotype was associated with a dose reduction factor of 0.71 . Authors state that because the SNPs are linked, a strict Bonferroni correction is too conservative…	Allele C is associated with decreased dose of morphine in people with Neoplasms as compared to allele G.	C			Is	Associated with	decreased	dose of		in people with	Disease:Neoplasms		G		0.5	0.65	0.65			0.5	0.65	SNP sin predominancia en alguna población	rs4818-C
981862234	981862242	cohort	197		cancer patients receiving oral morphine for pain. This cohort was also studied in PMID:15927391.	Disease	0.62	A			= 0.055	Unknown				European	rs2239393	COMT	morphine	19094200	Dosage, Efficacy	yes	This was for alleviation of pain from cancer. The association was as part of a haplotype consisting of 11 rsIDs (the other rsIDs are rs2075507,rs7287550, rs5746849, rs737866, rs6269, rs740603, rs4818, rs4680, rs174699, rs165728). The haplotype was associated with a dose reduction factor of 0.71 . Authors state that because the SNPs are linked, a strict Bonferroni correction is too conservative; h…	Allele A is associated with decreased dose of morphine in people with Neoplasms as compared to allele G.	A			Is	Associated with	decreased	dose of		in people with	Disease:Neoplasms		G		0.35	0.62	0.62	0.65	0.65	0.5	0.63	SNP sin predominancia en alguna población	rs2239393-A
981862244	981862252	cohort	197		cancer patients receiving oral morphine for pain. This cohort was also studied in PMID:15927391.	Disease	0.04	C			= 0.055	Unknown				European	rs174699	ARVCF, COMT	morphine	19094200	Dosage, Efficacy	yes	This was for alleviation of pain from cancer. The association was as part of a haplotype consisting of 11 rsIDs (the other rsIDs are rs2075507,rs7287550, rs5746849, rs737866, rs6269, rs2239393, rs4818, rs4680, rs737866, rs165728). The haplotype was associated with a dose reduction factor of 0.71 . Authors state that because the SNPs are linked, a strict Bonferroni correction is too conservative; …	Allele T is associated with decreased dose of morphine in people with Neoplasms as compared to allele C.	T			Is	Associated with	decreased	dose of		in people with	Disease:Neoplasms		C		0.941	0.806	0.851	0.91	0.819	0.9255	0.825333	SNP sin predominancia en alguna población	rs174699-T
981862254	981862263	cohort	197		cancer patients receiving oral morphine for pain. This cohort was also studied in PMID:15927391.	Disease	0.95	T			= 0.055	Unknown				European	rs165728	ARVCF, COMT	morphine	19094200	Dosage, Efficacy	yes	This was for alleviation of pain from cancer. The association was as part of a haplotype consisting of 11 rsIDs (the other rsIDs are rs2075507,rs7287550, rs5746849, rs737866, rs6269, rs2239393, rs4818, rs4680, rs174699, rs740603). The haplotype was associated with a dose reduction factor of 0.71 . Authors state that because the SNPs are linked, a strict Bonferroni correction is too conservative; …	Allele T is associated with decreased dose of morphine in people with Neoplasms as compared to allele C.	T			Is	Associated with	decreased	dose of		in people with	Disease:Neoplasms		C		0.868	0.75	0.851	0.905		0.8865	0.8005	SNP sin predominancia en alguna población	rs165728-T
981865125	981865135	cohort	222		Healthy volunteers	Study Cohort	0.42	T				Unknown				European	rs9923231	VKORC1	acenocoumarol	15790782	Efficacy	yes	Subjects with the T allele were found to have lower factor VII levels and higher INR changes when compared to subjects with the C allele. This SNP is reported to be in complete linkage disequilibrium with rs9934438.	Allele T is associated with increased response to acenocoumarol in healthy individuals as compared to allele C.	T			Is	Associated with	increased	response to		in healthy individuals			C		0.5	0.326	0.42	0.145	0.377	0.3225	0.374333	SNP sin predominancia en alguna población	rs9923231-T
981865171	981865176	case/control	757	791	Chronic Hepatitis C, type 1	Disease	0.406	T	0.387	T	= 0.019	OR	1.537	1.072	2.205	European	rs1946518	IL18	"interferon alfa-2a, recombinant", "interferon alfa-2b, recombinant", "interferons", "peginterferon alfa-2a", "peginterferon alfa-2b", "ribavirin"	19455410	Efficacy	yes	This association is for patients infected with viral genotype 1. Treatment was with 48 weeks of standard interferon-alpha-2a or interferon-alpha-2b plus ribavirin or pegylated interferon-alpha and ribavirin.	Allele T is associated with increased response to interferon alfa-2a, recombinant, interferon alfa-2b, recombinant, interferons, peginterferon alfa-2a, peginterferon alfa-2b or ribavirin in people with Hepatitis C, Chronic as compared to allele G.	T			Is	Associated with	increased	response to	or	in people with	Disease:Chronic hepatitis C virus infection		G		0.27	0.68	0.49	0.31	0.5	0.29	0.556667	SNP sin predominancia en alguna población	rs1946518-T
981865177	981865180	case/control	757	791	Chronic Hepatitis C, type 1	Disease	0.282	G	0.256	G	= 0.0302	OR	1.524	1.04	2.233	European	rs187238	IL18	"interferon alfa-2a, recombinant", "interferon alfa-2b, recombinant", "interferons", "peginterferon alfa-2a", "peginterferon alfa-2b", "ribavirin"	19455410	Efficacy	yes	This association is for patients infected with viral genotype 1. Treatment was with 48 weeks of standard interferon-alpha-2a or interferon-alpha-2b plus ribavirin or pegylated interferon-alpha and ribavirin. The allele associated with non-response is not entirely clear, since this is a GC SNP. Paper reports G associated with higher rate of non-response. Gene is on the negative chromosomal strand,…	Allele C is associated with decreased response to interferon alfa-2a, recombinant, interferon alfa-2b, recombinant, interferons, peginterferon alfa-2a, peginterferon alfa-2b or ribavirin in people with Hepatitis C, Chronic as compared to allele G.	C			Is	Associated with	decreased	response to	or	in people with	Disease:Chronic hepatitis C virus infection		G		0.45	0.87	0.66	0.81	0.35	0.63	0.626667	SNP sin predominancia en alguna población	rs187238-C
981953971	981954197	cohort	101		72% male. p-value and odds ratio adjusted for effects of gender, age of onset of illness, serum clozapine level, and more. Please see paper for full list of adjusted effects.	Gender	0.08	T			= 0.02	OR	28.36	1.69	476.03	Central/South Asian	rs1062613	HTR3A	clozapine	22700043	Efficacy	yes	Response was defined as a Brief Psychiatric Rating Scale (BPRS) total score of less than or equal to 35. Patients with the T allele had an increased likelihood of response to clozapine.	Allele T is associated with increased response to clozapine in people with Schizophrenia as compared to allele C.	T			Is	Associated with	increased	response to		in people with	Disease:Schizophrenia		C		0.35	0.21	0.17	0.43	0.19	0.39	0.19	SNP sin predominancia en alguna población	rs1062613-T
981954198	981954207	cohort	101		72% male. p-value and odds ratio adjusted for effects of gender, age of onset of illness, serum clozapine level, and more. Please see paper for full list of adjusted effects.	Gender	0.1	G			= 0.02	OR	6.59	1.32	32.95	Central/South Asian	rs2276302	HTR3A	clozapine	22700043	Efficacy	yes	Response was defined as a Brief Psychiatric Rating Scale (BPRS) total score of less than or equal to 35. Patients with the G allele had an increased likelihood of response to clozapine.	Allele G is associated with increased response to clozapine in people with Schizophrenia as compared to allele A.	G			Is	Associated with	increased	response to		in people with	Disease:Schizophrenia		A		0.28	0.27	0.21	0.49	0.25	0.385	0.243333	SNP sin predominancia en alguna población	rs2276302-G
981954851	981955667	case series	55		Major Depression	Disease	0.49	A			= 0.0055	Unknown				European	rs4680	COMT	paroxetine	18989660	Efficacy	yes	AA > AG > GG for response. A = Met allele; G = Val. The effect became significant at week 3 of treatment.	Allele A is associated with increased response to paroxetine in people with Depressive Disorder, Major as compared to allele G.	A			Is	Associated with	increased	response to		in people with	Disease:Major Depressive Disorder		G		0.567	0.373	0.362	0.31	0.399	0.4385	0.378	SNP sin predominancia en alguna población	rs4680-A
982006849	982006873	cohort	177		Opioid addiction	Drug					= 0.011	OR	20.25	1.46	280.5	European	rs7127507	BDNF, BDNF-AS	methadone	18182069	Efficacy	yes	This association is not found for the SNP alone, but for a haplotype containing 6 SNPs (rs7127507, rs1967554, rs11030118, rs988748, rs2030324 and rs11030119). The associated OR is for "increased risk of poorer response". There were 23 nonresponders and 68 responders.	Allele C is associated with decreased response to methadone in people with Opioid-Related Disorders as compared to allele T.	C			Is	Associated with	decreased	response to		in people with	Disease:Opioid-Related Disorders		T		0.619	0.25	0.293			0.619	0.2715	SNP sin predominancia en alguna población	rs7127507-C
982006874	982006896	cohort	177		Opioid addiction	Drug					= 0.011	OR	20.25	1.46	280.5	European	rs1967554	BDNF, BDNF-AS	methadone	18182069	Efficacy	yes	This association is not found for the SNP alone, but for a haplotype containing 6 SNPs (rs7127507, rs1967554, rs11030118, rs988748, rs2030324 and rs11030119). The associated OR is for "increased risk of poorer response". There were 23 nonresponders and 68 responders.	Allele C is associated with decreased response to methadone in people with Opioid-Related Disorders as compared to allele A.	C			Is	Associated with	decreased	response to		in people with	Disease:Opioid-Related Disorders		A		0.985	1	1			0.985	1	SNP sin predominancia en alguna población	rs1967554-C
982006910	982006919	cohort	177		Opioid addiction	Drug					= 0.011	OR	20.25	1.46	280.5	European	rs988748	BDNF	methadone	18182069	Efficacy	yes	This association is not found for the SNP alone, but for a haplotype containing 6 SNPs (rs7127507, rs1967554, rs11030118, rs988748, rs2030324 and rs11030119). The associated OR is for "increased risk of poorer response". There were 23 nonresponders and 68 responders.	Allele C is associated with decreased response to methadone in people with Opioid-Related Disorders as compared to allele G.	C			Is	Associated with	decreased	response to		in people with	Disease:Opioid-Related Disorders		G		0.16	0.44	0.2		0.81	0.16	0.483333	SNP sin predominancia en alguna población	rs988748-C
982006921	982006930	cohort	177		Opioid addiction	Drug					= 0.011	OR	20.25	1.46	280.5	European	rs2030324	BDNF	methadone	18182069	Efficacy	yes	This association is not found for the SNP alone, but for a haplotype containing 6 SNPs (rs7127507, rs1967554, rs11030118, rs988748, rs2030324 and rs11030119). The associated OR is for "increased risk of poorer response". There were 23 nonresponders and 68 responders.	Allele G is associated with decreased response to methadone in people with Opioid-Related Disorders as compared to allele A.	G			Is	Associated with	decreased	response to		in people with	Disease:Opioid-Related Disorders		A		0.58	0.421	0.511		0.546	0.58	0.492667	SNP sin predominancia en alguna población	rs2030324-G
982006932	982006941	cohort	177		Opioid addiction	Drug					= 0.011	OR	20.25	1.46	280.5	European	rs11030119	BDNF	methadone	18182069	Efficacy	yes	This association is not found for the SNP alone, but for a haplotype containing 6 SNPs (rs7127507, rs1967554, rs11030118, rs988748, rs2030324 and rs11030119). The associated OR is for "increased risk of poorer response". There were 23 nonresponders and 68 responders.	Allele G is associated with decreased response to methadone in people with Opioid-Related Disorders as compared to allele A.	G			Is	Associated with	decreased	response to		in people with	Disease:Opioid-Related Disorders		A		0.4	0.86	0.74		0.77	0.4	0.79	SNP predominantes en ancestría europea	rs11030119-G
982009991	982009999	clinical trial	26	26	Here cases = treated with ivacaftor 150mg, controls = treated with placebo, for 48 weeks, dosing every 12 hours. Patients remained on pre-study medications throughout the trial, including some patients on dornase alfa and tobramycin. Statistics given; adjusted change from baseline in % predicted FEV1 at 48 weeks ivacaftor vs placebo difference.	Study Cohort					= 6.0E-4	Unknown				Multiple groups	rs75527207	CFTR	ivacaftor	23590265	Efficacy	yes	Patients aged 6-11 at time of screening who had at least one allele with the G551D mutation (allele A at position rs75527207) were recruited for this trial. Ivacaftor is only indicated in CF patients with this mutation. Significant improvements in lung function were seen in the ivacaftor treatment group compared to placebo.	Allele A is associated with response to ivacaftor in children with Cystic Fibrosis.	A	Pediatric		Is	Associated with		response to		in children with	Disease:Cystic Fibrosis							0		0		SNP sin predominancia en alguna población	rs75527207-A
982015058	982015065	cohort	861		GOLDN study population. p-value threshold for significance after correction for multiple testing set at 0.0001. p-value quoted is for association with significant change in HDL levels.	Study Cohort					< 1.0E-4	Unknown				European	rs964184	APOA1	fenofibrate	23119086	Efficacy	yes	Patients with the G allele had a greater increase in high-density lipoprotein (HDL) cholesterol and triglyceride (TG) level between baseline and either 3 weeks or 8 weeks of fenofibrate treatment, as compared to those with the C allele. Two cohorts were used: the discovery cohort came from the National Heart, Lung and Blood Institute GOLDN study population, and the replication cohort came from th…	Allele G is associated with increased response to fenofibrate in people with Hypertriglyceridemia as compared to allele C.	G			Is	Associated with	increased	response to		in people with	Disease:Hypertriglyceridemia		C		0.14	0.41	0.24	0.21	0.27	0.175	0.306667	SNP sin predominancia en alguna población	rs964184-G
982015513	982015527	cohort	84		Schizophrenia	Disease					= 0.12	Unknown				European	rs1880676	CHAT	olanzapine	17503482	Dosage, Efficacy	yes	This association was nominally significant (p= 0.04) in the Spanish cohort but not in the Basque cohort, but if corrected for the 3 SNPs tested, p = 0.12.	Allele A is associated with increased response to olanzapine in people with Schizophrenia as compared to allele G.	A			Is	Associated with	increased	response to		in people with	Disease:Schizophrenia		G		0.5	0.176	0.229	0.01	0.198	0.255	0.201	SNP sin predominancia en alguna población	rs1880676-A
982015564	982015570	cohort, retrospective	1056		Adolescents in treatment for substance abuse and delinquincy at CADD(Colorado Center on Antisocial Drug Dependence), plus members of the Colorado Twin registry and of the Colorado Adoption project.; Mean age 18.1 +/- 1.50 yrs.	Age Group					< 0.007	Unknown				Multiple groups, 74% Caucasian;16% Hispanic;4% African American;6% other.	rs4950	CHRNB3	nicotine	18055561	Efficacy, Other	yes	Authors note that this study relied on retrospective reports of initial responses to smoking and mention that this type of report has been shown to be reliable. The three measures (of nine tobacco phenotypes measured) found to be associated were subjective measures and were nominally associated, with two of these associated after correction for multiple testing. First, 7 SNPs were tested in the C…	Allele G is associated with increased response to nicotine in smokers as compared to allele A.	G	Pediatric		Is	Associated with	increased	response to		in	Other:smokers		A		0.46	0.29	0.3		0.3	0.46	0.296667	SNP sin predominancia en alguna población	rs4950-G
982015573	982015577	cohort, retrospective	1056		Adolescents in treatment for substance abuse and delinquincy at CADD(Colorado Center on Antisocial Drug Dependence), plus members of the Colorado Twin registry and of the Colorado Adoption project.; Mean age 18.1 +/- 1.50 yrs.	Drug					< 0.007	Unknown				Multiple groups, 74% Caucasian;16% Hispanic;4% African American;6% other.	rs13280604	CHRNB3	nicotine	18055561	Efficacy, Other	yes	Authors note that this study relied on retrospective reports of initial responses to smoking and mention that this type of report has been shown to be reliable. The two measures (of nine tobacco phenotypes measured) found to be associated were subjective measures and were nominally associated, with one of these associated after correction for multiple testing. First, 7 SNPs were tested in the CAD…	Allele G is associated with increased response to nicotine in smokers as compared to allele A.	G	Pediatric		Is	Associated with	increased	response to		in	Other:smokers		A		0.46	0.27	0.3		0.3	0.46	0.29	SNP sin predominancia en alguna población	rs13280604-G
982015800	982015808	cohort	130			Unknown					= 0.038	Unknown				East Asian	rs2020917	COMT	risperidone	22935916	Efficacy	yes	When combined with the C allele in rs9606186 and the C allele in rs933271. Patients with the haplotype C-C-C across these three SNPs have poorer response to risperidone. "Responders" were classified as patients who showed a reduction of 40% or more in Brief Psychiatric Rating Scale (BPRS) scores after 8 weeks of risperidone monotherapy. All other patients were considered "nonresponders".	Allele C is associated with decreased response to risperidone in people with Schizophrenia.	C			Is	Associated with	decreased	response to		in people with	Disease:Schizophrenia				0.44	0.84	0.78	0.89		0.665	0.81	SNP sin predominancia en alguna población	rs2020917-C
982015810	982015816	cohort	130			Unknown					= 0.038	Unknown				East Asian	rs933271	COMT	risperidone	22935916	Efficacy	yes	When combined with the C allele in rs9606186 and the C allele in rs2020917. Patients with the haplotype C-C-C across these three SNPs have poorer response to risperidone. "Responders" were classified as patients who showed a reduction of 40% or more in Brief Psychiatric Rating Scale (BPRS) scores after 8 weeks of risperidone monotherapy. All other patients were considered "nonresponders".	Allele C is associated with decreased response to risperidone in people with Schizophrenia.	C			Is	Associated with	decreased	response to		in people with	Disease:Schizophrenia				0.731	0.222	0.415		0.449	0.731	0.362	SNP sin predominancia en alguna población	rs933271-C
982015818	982015823	cohort	130			Unknown					= 0.038	Unknown				East Asian	rs9606186	COMT	risperidone	22935916	Efficacy	yes	When combined with the C allele in rs2020917 and the C allele in rs933271. Patients with the haplotype C-C-C across these three SNPs have poorer response to risperidone. "Responders" were classified as patients who showed a reduction of 40% or more in Brief Psychiatric Rating Scale (BPRS) scores after 8 weeks of risperidone monotherapy. All other patients were considered "nonresponders".	Allele C is associated with decreased response to risperidone in people with Schizophrenia.	C			Is	Associated with	decreased	response to		in people with	Disease:Schizophrenia				0.26		0.35	0.44	0.66	0.35	0.505	SNP sin predominancia en alguna población	rs9606186-C
982029098	982029107	case series	2			Unknown						Unknown				Unknown	rs28399504	CYP2C19	mephenytoin	9435198	Metabolism/PK	yes	Mephenytoin is used as a probe drug for phenotyping CYP2C19.	Allele G is associated with decreased metabolism of mephenytoin as compared to allele A.	G			Is	Associated with	decreased	metabolism of					A			0.003	0	0.005	0.002	0.005	0.00166667	SNP sin predominancia en alguna población	rs28399504-G
982031201	982031212	meta-analysis			Combined results from present study and previous GWAS (PMID: 22569225).	Study Cohort					= 3.34E-11	OR	2.91	2.57	3.25	Unknown	rs3794271	SLCO1C1	Tumor necrosis factor alpha (TNF-alpha) inhibitors	23651021	Efficacy	yes	Whether response was better with which allele was not stated, however looking at genotype frequencies the G allele is associated with increased likelihood of not responding, whereas A increased likelihood of a good response; n=31 genotype GG: 16% good, 39% moderate, 45% none. n=151 genotype AG: 27% good, 44% moderate, 28.5% none. n=131 with genotype AA: 44% good, 13% moderate, 15% none.	Allele G is associated with decreased response to Tumor necrosis factor alpha (TNF-alpha) inhibitors in people with Arthritis, Rheumatoid as compared to allele A.	G			Is	Associated with	decreased	response to		in people with	Disease:Rheumatoid arthritis		A		0.38	0.61	0.44	0.57	0.51	0.475	0.52	SNP sin predominancia en alguna población	rs3794271-G
982031223	982031230	cohort, replication	115		Cohort collected as part of the Immune-Mediated Inflammatory Disease Consortium (IMIDC). Infliximab subgroup analyzed seperately. Response as determined by EULAR 'good' versus 'none'.	Study Cohort					= 0.0046	Unknown				European	rs3794271	SLCO1C1	infliximab	23651021	Efficacy	yes	Whether response was better with which allele was not stated, however looking at genotype frequencies the G allele is associated with increased likelihood of not responding, whereas A increased likelihood of a good response.	Allele G is associated with decreased response to infliximab in people with Arthritis, Rheumatoid as compared to allele A.	G			Is	Associated with	decreased	response to		in people with	Disease:Rheumatoid arthritis		A		0.38	0.61	0.44	0.57	0.51	0.475	0.52	SNP sin predominancia en alguna población	rs3794271-G
982031232	982031239	cohort, replication	113		Cohort collected as part of the Immune-Mediated Inflammatory Disease Consortium (IMIDC). Etanercept subgroup analyzed seperately. Response as determined by EULAR 'good' versus 'none'.	Study Cohort					= 2.8E-4	Unknown				European	rs3794271	SLCO1C1	etanercept	23651021	Efficacy	yes	Whether response was better with which allele was not stated, however looking at genotype frequencies the G allele is associated with increased likelihood of not responding, whereas A increased likelihood of a good response.	Allele G is associated with decreased response to etanercept in people with Arthritis, Rheumatoid as compared to allele A.	G			Is	Associated with	decreased	response to		in people with	Disease:Rheumatoid arthritis		A		0.38	0.61	0.44	0.57	0.51	0.475	0.52	SNP sin predominancia en alguna población	rs3794271-G
982032947	982032954	cohort, GWAS	181			Unknown					= 9.7E-5	Unknown				European	rs4917639	CYP2C9	warfarin	18535201	Dosage	yes		Allele C is associated with decreased dose of warfarin as compared to allele A.	C			Is	Associated with	decreased	dose of					A		0.5	0.091	0.202	0.2	0.194	0.35	0.162333	SNP sin predominancia en alguna población	rs4917639-C
982032955	982032964	cohort, GWAS	181			Unknown					= 2.0E-4	Unknown				European	rs1057910	CYP2C9	warfarin	18535201	Dosage	yes		Allele C is associated with decreased dose of warfarin as compared to allele A.	C			Is	Associated with	decreased	dose of					A		0.5	0.058	0.064	0.01		0.255	0.061	SNP sin predominancia en alguna población	rs1057910-C
982033113	982033130	cohort	1508		Study Cohort: Patients on warfarin who were in the Biobank Japan project. 807 Japanese patients with a low therapeutic warfarin dose and 701 Japanese patients with a high therapeutic warfarin dose.	Study Cohort					= 3.84E-7	Unknown				East Asian	rs10509680	CYP2C9	warfarin	20833655	Dosage	yes		Allele T is associated with decreased dose of warfarin as compared to allele G.	T			Is	Associated with	decreased	dose of					G		0.5		0.064	0.01	0.049	0.255	0.0565	SNP sin predominancia en alguna población	rs10509680-T
982033139	982033147	cohort	1508		Study Cohort: Patients on warfarin who were in the Biobank Japan project. 807 Japanese patients with a low therapeutic warfarin dose and 701 Japanese patients with a high therapeutic warfarin dose.	Study Cohort					= 8.65E-31	Unknown				East Asian	rs9923231	VKORC1	warfarin	20833655	Dosage	yes		Allele T is associated with decreased dose of warfarin as compared to allele C.	T			Is	Associated with	decreased	dose of					C		0.5	0.326	0.42	0.145	0.377	0.3225	0.374333	SNP sin predominancia en alguna población	rs9923231-T
982033533	982033543	cohort	561			Unknown					= 0.001	Unknown				Unknown	rs1057910	CYP2C9	warfarin	10961881	Dosage	yes		Allele C is associated with decreased dose of warfarin as compared to allele A.	C			Is	Associated with	decreased	dose of					A		0.5	0.058	0.064	0.01		0.255	0.061	SNP sin predominancia en alguna población	rs1057910-C
982033561	982033568	cohort	561			Unknown					= 0.001	Unknown				Unknown	rs1799853	CYP2C9	warfarin	10961881	Dosage	yes		Allele T is associated with decreased dose of warfarin as compared to allele C.	T			Is	Associated with	decreased	dose of					C			0.089	0.122	0.035		0.035	0.1055	SNP sin predominancia en alguna población	rs1799853-T
982035533	982035562	retrospective	120		Amlodipine, felodipine, nifedipine, nitrendipine, or lacidipine.	Drug	0.69	C			= 0.011	Unknown				European	rs2239128	CACNA1C	Calcium channel blockers	16610939	Efficacy	yes	Response was classified as having a minimum of three blood pressure (BP) measurements of less than 140 systolic and 90 diastolic, and no more than one hypertensive BP measurement (greater then 140 systolic and 90 diastolic). All other patients were classified as non-responders. Patients were treated for at least 6 months.	Allele C is associated with increased response to calcium channel blockers in people with Hypertension as compared to allele T.	C			Is	Associated with	increased	response to		in people with	Disease:Hypertension		T		0.611	0.765	0.819		0.78	0.611	0.788	SNP sin predominancia en alguna población	rs2239128-C
982036156	982036188	retrospective	53		Subpopulation of patients taking only amlodipine or felodipine.	Drug					= 0.04	Unknown				European	rs2239128	CACNA1C	amlodipine, felodipine	16610939	Efficacy	yes	Response was classified as having a minimum of three blood pressure (BP) measurements of less than 140 systolic and 90 diastolic, and no more than one hypertensive BP measurement (greater then 140 systolic and 90 diastolic). All other patients were classified as non-responders. Patients were treated for at least 6 months.	Allele C is associated with increased response to amlodipine and felodipine in people with Hypertension as compared to allele T.	C			Is	Associated with	increased	response to	and	in people with	Disease:Hypertension		T		0.611	0.765	0.819		0.78	0.611	0.788	SNP sin predominancia en alguna población	rs2239128-C
982036689	982036696	cohort	205		205 Turkish patients taking warfarin for >2 months	Study Cohort	0.13	T			< 1.0E-4	Unknown				Near Eastern	rs1799853	CYP2C9	warfarin	18542936	Dosage	yes	in Turkish patients taking warfarin for >2 months. This variant defines CYP2C9*2. Homozygous variant genotype (*2/*2,*2/*3,and *3/*3) are grouped together, and heterozygous variant genotype (*1/*2,*1/*3,and *1/*4) are grouped together for analysis. Patients carrying one or two copies of CYP2C9 variant alleles are associated with lower dose of warfarin as compared to the homozygous wild type patie…	Allele T is associated with decreased dose of warfarin as compared to allele C.	T			Is	Associated with	decreased	dose of					C			0.089	0.122	0.035		0.035	0.1055	SNP sin predominancia en alguna población	rs1799853-T
982036698	982036705	cohort	205		205 Turkish patients taking warfarin for >2 months	Study Cohort	0.1	C			< 1.0E-4	Unknown				Near Eastern	rs1057910	CYP2C9	warfarin	18542936	Dosage	yes	in Turkish patients taking warfarin for >2 months. This variant defines CYP2C9*3. Homozygous variant genotype (*2/*2,*2/*3,and *3/*3) are grouped together, and heterozygous variant genotype (*1/*2,*1/*3,and *1/*4) are grouped together for analysis. Patients carrying one or two copies of CYP2C9 variant alleles are associated with lower dose of warfarin as compared to the homozygous wild type patie…	Allele C is associated with decreased dose of warfarin as compared to allele A.	C			Is	Associated with	decreased	dose of					A		0.5	0.058	0.064	0.01		0.255	0.061	SNP sin predominancia en alguna población	rs1057910-C
982037196	982037206	cohort	1447		Chinese Community-Based Comprehensive Prevention and Control of Hypertension project. p-value for the total population.	Study Cohort					= 0.019	Unknown				East Asian	rs4762	AGT	benazepril	17261659	Efficacy	yes	When in a haplotype with rs699 allele A and rs7079 allele T. Patients with this haplotype had a greater decrease in diastolic blood pressure between baseline and 3 years of treatment, compared to those with any other combination of alleles at these positions. Haplotypes were analyzed in an exploratory group (n=733), a confirmatory group (n=714) and for the total population (n=1447). Significant r…	Allele G is associated with increased response to benazepril in people with Hypertension.	G			Is	Associated with	increased	response to		in people with	Disease:Hypertension				0.5	0.89	0.89	0.94		0.72	0.89	SNP sin predominancia en alguna población	rs4762-G
982037209	982037216	cohort	1447		Chinese Community-Based Comprehensive Prevention and Control of Hypertension project. p-value for the total population.	Study Cohort					= 0.019	Unknown				East Asian	rs699	AGT	benazepril	17261659	Efficacy	yes	When in a haplotype with rs4762 allele G and rs7079 allele T. Patients with this haplotype had a greater decrease in diastolic blood pressure between baseline and 3 years of treatment, compared to those with any other combination of alleles at these positions. Haplotypes were analyzed in an exploratory group (n=733), a confirmatory group (n=714) and for the total population (n=1447). Significant …	Allele A is associated with increased response to benazepril in people with Hypertension.	A			Is	Associated with	increased	response to		in people with	Disease:Hypertension				0.12		0.45	0.15	0.36	0.135	0.405	SNP sin predominancia en alguna población	rs699-A
982037219	982037225	cohort	1447		Chinese Community-Based Comprehensive Prevention and Control of Hypertension project. p-value for the total population.	Study Cohort					= 0.019	Unknown				East Asian	rs7079	AGT	benazepril	17261659	Efficacy	yes	When in a haplotype with rs4762 allele G and rs699 allele A. Patients with this haplotype had a greater decrease in diastolic blood pressure between baseline and 3 years of treatment, compared to those with any other combination of alleles at these positions. Haplotypes were analyzed in an exploratory group (n=733), a confirmatory group (n=714) and for the total population (n=1447). Significant r…	Allele T is associated with increased response to benazepril in people with Hypertension.	T			Is	Associated with	increased	response to		in people with	Disease:Hypertension				0.571	0.083	0.245	0.09	0.192	0.3305	0.173333	SNP sin predominancia en alguna población	rs7079-T
982037860	982037867	cohort	226			Unknown	0.007	C			< 0.001	Unknown				African American/Afro-Caribbean	rs1057910	CYP2C9	warfarin	20072124	Dosage	yes	This variant defines CYP2C9*3.	Allele C is associated with decreased dose of warfarin as compared to allele A.	C			Is	Associated with	decreased	dose of					A		0.5	0.058	0.064	0.01		0.255	0.061	SNP sin predominancia en alguna población	rs1057910-C
982037879	982037886	cohort	226			Unknown	0.022	T			< 0.001	Unknown				African American/Afro-Caribbean	rs1799853	CYP2C9	warfarin	20072124	Dosage	yes	This variant defines CYP2C9*2.	Allele T is associated with decreased dose of warfarin as compared to allele C.	T			Is	Associated with	decreased	dose of					C			0.089	0.122	0.035		0.035	0.1055	SNP sin predominancia en alguna población	rs1799853-T
982037894	982037902	cohort	226			Unknown	0.091	T			= 0.002	Unknown				African American/Afro-Caribbean	rs9923231	VKORC1	warfarin	20072124	Dosage	yes		Allele T is associated with decreased dose of warfarin as compared to allele C.	T			Is	Associated with	decreased	dose of					C		0.5	0.326	0.42	0.145	0.377	0.3225	0.374333	SNP sin predominancia en alguna población	rs9923231-T
982037919	982037925	cohort	226			Unknown	0.04	C			= 0.027	Unknown				African American/Afro-Caribbean	rs2884737	VKORC1	warfarin	20072124	Dosage	yes		Allele C is associated with decreased dose of warfarin as compared to allele A.	C			Is	Associated with	decreased	dose of					A		0.5	0.155	0.186	0.05	0.161	0.275	0.167333	SNP sin predominancia en alguna población	rs2884737-C
982043429	982043441	cohort	410		p-value refers to the association with DBP.	Study Cohort					= 0.003	Unknown				East Asian	rs1801131	MTHFR	benazepril	16081343	Efficacy	yes	When in a haplotype with rs1801133 allele G, and where only one copy of this GG haplotype was present. Patients with this haplotype had a significantly lower diastolic and systolic blood pressure (DBP and SBP) response to benazepril between baseline and 15 days of treatment, as compared to those with any other haplotype. Please note: alleles have been complemented to the plus chromosomal strand.	Allele G is associated with decreased response to benazepril in people with Hypertension.	G			Is	Associated with	decreased	response to		in people with	Disease:Hypertension				0.591	0.182	0.133	0.085	0.197	0.338	0.170667	SNP sin predominancia en alguna población	rs1801131-G
982043442	982043450	cohort	410		p-value refers to the association with DBP.	Study Cohort					= 0.003	Unknown				East Asian	rs1801133	MTHFR	benazepril	16081343	Efficacy	yes	When in a haplotype with rs1801131 allele G, and where only one copy of this GG haplotype was present. Patients with this haplotype had a significantly lower diastolic and systolic blood pressure (DBP and SBP) response to benazepril between baseline and 15 days of treatment, as compared to those with any other haplotype. Please note alleles have been complemented to the plus chromosomal strand.	Allele G is associated with decreased response to benazepril in people with Hypertension.	G			Is	Associated with	decreased	response to		in people with	Disease:Hypertension				0.43	0.54	0.46	0.84	0.55	0.635	0.516667	SNP sin predominancia en alguna población	rs1801133-G
982044299	982044306	cohort	41		81% male. Disease: chronic heart failure or angina pectoris.	Gender					< 0.001	Unknown				East Asian	rs12233719	UGT2B7	carvedilol	17329852	Metabolism/PK	yes	When allele T is in combination with rs28365063 G allele, the combination of which is defined as UGT2B7*3 by the UGT Nomenclature Committee. As compared to the G allele combined with rs28365063 A allele (wild-type, or UGT2B7*1). In other words, UGT2B7*3 is associated with decreased oral clearance (CL/F) of carvedilol as compared to UGT2B7*1.	Allele T is associated with decreased clearance of carvedilol in people with Heart Diseases as compared to allele G.	T			Is	Associated with	decreased	clearance of		in people with	Disease:Heart Diseases		G		0.5	0.006	0.011			0.5	0.0085	SNP sin predominancia en alguna población	rs12233719-T
982044307	982044313	cohort	41		81% male. Disease: chronic heart failure or angina pectoris.	Gender					< 0.001	Unknown				East Asian	rs28365063	UGT2B7	carvedilol	17329852	Metabolism/PK	yes	When allele G is in combination with rs12233719 T allele, the combination of which is defined as UGT2B7*3 by the UGT Nomenclature Committee. As compared to the A allele combined with rs12233719 G allele (wild-type, or UGT2B7*1). In other words, UGT2B7*3 is associated with decreased oral clearance (CL/F) of carvedilol as compared to UGT2B7*1.	Allele G is associated with decreased clearance of carvedilol in people with Heart Diseases as compared to allele A.	G			Is	Associated with	decreased	clearance of		in people with	Disease:Heart Diseases		A		0.5	0.085	0.106	0.07	0.092	0.285	0.0943333	SNP sin predominancia en alguna población	rs28365063-G
982044349	982044355	cohort	93			Unknown					< 1.0E-4	Unknown				European	rs2359612	VKORC1	warfarin	16611750	Dosage	yes		Allele G is associated with increased dose of warfarin as compared to allele A.	G			Is	Associated with	increased	dose of					A		0.818	0.53	0.564	0.765	0.595	0.7915	0.563	SNP sin predominancia en alguna población	rs2359612-G
982044357	982044363	cohort	93			Unknown					= 0.0015	Unknown				European	rs2884737	VKORC1	warfarin	16611750	Dosage	yes		Allele C is associated with decreased dose of warfarin as compared to allele A.	C			Is	Associated with	decreased	dose of					A		0.5	0.155	0.186	0.05	0.161	0.275	0.167333	SNP sin predominancia en alguna población	rs2884737-C
982044365	982044371	cohort	93			Unknown					< 1.0E-4	Unknown				European	rs8050894	VKORC1	warfarin	16611750	Dosage	yes		Allele G is associated with decreased dose of warfarin as compared to allele C.	G			Is	Associated with	decreased	dose of					C		0.545	0.445	0.441	0.275		0.41	0.443	SNP sin predominancia en alguna población	rs8050894-G
1003775005	1004987508	cohort	180		Simvastatin treatment for 6 months - percentage change in lipids were determined. Patients were not on any other drugs. P value given here is for the reduction percentage of triglycerides.	Drug	0.67	A			= 0.041	Unknown				Unknown	rs5882	CETP	simvastatin	17931083	Efficacy	yes	as measured by a greater decrease in TG levels and a greater increase in HDL-C levels (please note that total cholesterol and LDL level changes did not differ significantly). Variant described as CETP I405V (I= allele A, V= allele G).	Allele A is associated with increased response to simvastatin in people with Hypercholesterolemia as compared to allele G.	A			Is	Associated with	increased	response to		in people with	Disease:Hypercholesterolemia		G		0.568	0.649	0.697	0.465	0.636	0.5165	0.660667	SNP sin predominancia en alguna población	rs5882-A
1043737597	1043737601	retrospective	14		Baselines for each patient were calculated by averaging all available pre-treatment measurements at different time points. Change post-treatment was calculated using the last available measurement for each patient. P value here is for increase in FEV1.	Study Cohort					< 0.01	Unknown				Unknown	rs75527207	CFTR	ivacaftor	23757359	Efficacy	yes	A retrospective study of patients in Germany with severe Cystic Fibrosis (FEV1 <40%predicted) with the G551D mutation who were treated with ivacaftor. On average, FEV1and body weight increased significantly, though response was variable in this patient group and several patients discontinued ivacaftor for different complications.	Allele A is associated with response to ivacaftor in people with Cystic Fibrosis.	A			Is	Associated with		response to		in people with	Disease:Cystic Fibrosis							0		0		SNP sin predominancia en alguna población	rs75527207-A
1183533905	1183533909	cohort	53		Liver transplant donors	Study Cohort	0.661	C			< 0.0124	Unknown				East Asian	rs776746	CYP3A5	tacrolimus	21359536	Dosage	yes	Tacrolimus dose is associated with CYP3A5 genotype of the donor liver, but not of the recipient. The decrease in dose was reported as an increase in concentration/dose ratio.	Allele C is associated with decreased dose of tacrolimus in people with liver transplantation as compared to allele T.	C			Is	Associated with	decreased	dose of		in people with	Disease:Liver transplantation		T		0.152	0.777		0.365	0.752	0.2585	0.7645	SNP predominantes en ancestría europea	rs776746-C
1183622437	1183622451	cohort, clinical trial	105		Clinical trial NCT00384020. Patients received a fixed dose of 10mg for the first 4 weeks, then doses of 10-30mg daily for another 4 weeks.	Study Cohort					= 0.05	Unknown				East Asian	rs2069521		escitalopram	23859573	Metabolism/PK	yes	as measured by a higher S-Didesmethylcitalopram/ S-citalopram metabolic ratio at 2 weeks of treatment. No significant difference was seen at 4 or 8 weeks.	Allele A is associated with increased metabolism of escitalopram in people with Depressive Disorder, Major as compared to allele G.	A			Is	Associated with	increased	metabolism of		in people with	Disease:Major Depressive Disorder		G		0.5	0.016	0.027	0.097		0.2985	0.0215	SNP sin predominancia en alguna población	rs2069521-A
1183622452	1183622454	cohort, clinical trial	105		Clinical trial NCT00384020. Patients received a fixed dose of 10mg for the first 4 weeks, then doses of 10-30mg daily for another 4 weeks.	Study Cohort					= 0.05	Unknown				East Asian	rs2069526	CYP1A2	escitalopram	23859573	Metabolism/PK	yes	as measured by a higher S-Didesmethylcitalopram/ S-citalopram metabolic ratio at 2 and 8 weeks of treatment.	Allele G is associated with increased metabolism of escitalopram in people with Depressive Disorder, Major as compared to allele T.	G			Is	Associated with	increased	metabolism of		in people with	Disease:Major Depressive Disorder		T		0.5	0.03	0.027	0.1	0.035	0.3	0.0306667	SNP sin predominancia en alguna población	rs2069526-G
1183622456	1183622458	cohort, clinical trial	105		Clinical trial NCT00384020. Patients received a fixed dose of 10mg for the first 4 weeks, then doses of 10-30mg daily for another 4 weeks.	Study Cohort					= 0.05	Unknown				East Asian	rs4646425	CYP1A2	escitalopram	23859573	Metabolism/PK	yes	as measured by a higher S-Didesmethylcitalopram/ S-citalopram metabolic ratio at 2 weeks of treatment. No significant difference was seen at 4 or 8 weeks. This SNP was in complete LD with rs762551.	Allele T is associated with increased metabolism of escitalopram in people with Depressive Disorder, Major as compared to allele C.	T			Is	Associated with	increased	metabolism of		in people with	Disease:Major Depressive Disorder		C			0.015	0.027	0	0.019	0	0.0203333	SNP sin predominancia en alguna población	rs4646425-T
1183622460	1183622462	cohort, clinical trial	105		Clinical trial NCT00384020. Patients received a fixed dose of 10mg for the first 4 weeks, then doses of 10-30mg daily for another 4 weeks.	Study Cohort					= 0.05	Unknown				East Asian	rs4646427	CYP1A2	escitalopram	23859573	Metabolism/PK	yes	as measured by a higher S-Didesmethylcitalopram/ S-citalopram metabolic ratio at 2 weeks of treatment. No significant difference was seen at 4 or 8 weeks. This SNP was in complete LD with rs3743484.	Allele C is associated with increased metabolism of escitalopram in people with Depressive Disorder, Major as compared to allele T.	C			Is	Associated with	increased	metabolism of		in people with	Disease:Major Depressive Disorder		T		0.5	0.023	0.027	0.095		0.2975	0.025	SNP sin predominancia en alguna población	rs4646427-C
1183631253	1183632052	clinical trial, GWAS	424		Primary Hypertension. PEAR (228) (= NCT00246519) + GERA (196)	Disease	0.04	A			= 1.37e-6	Unknown				European	rs16960228	PRKCA	"diuretics", "hydrochlorothiazide", "Thiazides, plain"	23753411	Efficacy	yes	Observations: 4.46 mm Hg increased reduction of diastolic blood pressure per A allele in PEAR + GERA, 3.26 mm Hg increased reduction of diastolic blood pressure per A allele in NORDIL, and 4.16 mm Hg increased reduction of diastolic blood pressure per A allele in PEAR + GERA + NORDIL.The association did not reach genome-wide significance when only PEAR + GERA were analyzed, but this SNP was selec…	Allele A is associated with increased response to diuretics, hydrochlorothiazide or Thiazides, plain in people with Hypertension as compared to allele G.	A			Is	Associated with	increased	response to	or	in people with	Disease:Hypertension		G		0.568	0.097	0.144	0.3	0.162	0.434	0.134333	SNP sin predominancia en alguna población	rs16960228-A
1183631503	1183631505	clinical trial	258		Hypertensives: Nordic Diltiazem Study (NORDIL)	Disease					= 0.050	Unknown				European	rs4149601	NEDD4L	Aldosterone antagonists, amiloride	21052022	Efficacy	yes	This was true for systolic blood pressure but not for diastolic blood pressure.	Allele G is associated with increased response to Aldosterone antagonists or amiloride in people with Hypertension as compared to allele A.	G			Is	Associated with	increased	response to	or	in people with	Disease:Hypertension		A		0.35	0.78	0.72	0.7	0.74	0.525	0.746667	SNP sin predominancia en alguna población	rs4149601-G
1183632007	1183632030	clinical trial, GWAS	424		Primary Hypertension. subjects from PEAR (228) (= NCT00246519), GERA (196)	Disease	0.87	A			= 4.9e-8	Unknown				European	rs2776546		"diuretics", "hydrochlorothiazide", "Thiazides, plain"	23753411	Efficacy	yes	The association was with diastolic blood pressure response. Observations: 3.24 mm Hg greater reduction of diastolic blood pressure per A allele in PEAR + GERA, 0.88mm Hg greater reduction in diastolic blood pressure per A allele in NORDIL	Allele A is associated with increased response to diuretics, hydrochlorothiazide or Thiazides, plain in people with Hypertension as compared to allele C.	A			Is	Associated with	increased	response to	or	in people with	Disease:Hypertension		C		0.87	0.635	0.739	0.6	0.728	0.735	0.700667	SNP sin predominancia en alguna población	rs2776546-A
1183632042	1183632044	clinical trial, GWAS	424		Primary Hypertension. subjects from PEAR (228) (= NCT00246519), GERA (196)	Disease	0.46	A			= 2.9E-08	Unknown				European	rs238		"diuretics", "hydrochlorothiazide", "Thiazides, plain"	23753411	Efficacy	yes	The association was significant in PEAR + GERA, but not in NORDIL (in which the effect was opposite, though small) or in the 3-study meta-analysis. Observations: 3.11 mm Hg decrease in reduction of systolic blood pressure per A allele in PEAR + GERA, 0.45 mm Hg greater reduction in systolic blood pressure per A allele in NORDIL and 2.22 mm Hg decrease in reduction of systolic blood pressure per A…	Allele A is associated with decreased response to diuretics, hydrochlorothiazide or Thiazides, plain in people with Hypertension as compared to allele G.	A			Is	Associated with	decreased	response to	or	in people with	Disease:Hypertension		G		0.09	0.43	0.29		0.3	0.09	0.34	SNP sin predominancia en alguna población	rs238-A
1183632046	1183632048	clinical trial, GWAS	424		Primary Hypertension. subjects from PEAR (228) (= NCT00246519), GERA (196)	Disease	0.46	C			= 4.5e-08	Unknown				European	rs4815273		"diuretics", "hydrochlorothiazide", "Thiazides, plain"	23753411	Efficacy	yes	The association was with systolic blood pressure response. Observations: 2.91 mm Hg increased reduction of systolic blood pressure per T allele in PEAR + GERA, 0.39 mm Hg increased reduction of systolic blood pressure per T allele in NORDIL, and 2.34 mm Hg increased reduction of systolic blood pressure per T allele in PEAR + GERA + NORDIL. This association was significant in PEAR + GERA but not i…	Allele T is associated with increased response to diuretics, hydrochlorothiazide or Thiazides, plain in people with Hypertension as compared to allele C.	T			Is	Associated with	increased	response to	or	in people with	Disease:Hypertension		C		0.65	0.3	0.399		0.407	0.65	0.368667	SNP sin predominancia en alguna población	rs4815273-T
1183632057	1183632059	clinical trial, GWAS	424		Primary Hypertension. subjects from PEAR (228) (= NCT00246519), GERA (196)	Disease	0.96	T			= 1.36E-06	Unknown				European	rs4791040	PRKCA	"diuretics", "hydrochlorothiazide", "Thiazides, plain"	23753411	Efficacy	yes	The association was with diastolic blood pressure response. It did not reach genome-wide significance when only PEAR + GERA were analyzed, but this SNP was selected for replication in NORDIL and this association was significant. Observations: 4.46 mm Hg decreased reduction of diastolic blood pressure per T allele in PEAR + GERA, 3.30 mm Hg decreased reduction of diastolic blood pressure per T all…	Allele T is associated with decreased response to diuretics, hydrochlorothiazide or Thiazides, plain in people with Hypertension as compared to allele C.	T			Is	Associated with	decreased	response to	or	in people with	Disease:Hypertension		C		0.43		0.85		0.83	0.43	0.84	SNP predominantes en ancestría europea	rs4791040-T
1183681975	1183681993	cohort	344		Patients were from outpatient pain centers at German hospitals.	Study Cohort	0.5	A			= 0.004	OR				European	rs1045642	ABCB1	buprenorphine, dihydrocodeine, fentanyl, hydromorphone, methadone, morphine, oxycodone, piritramide, tilidine, tramadol	19514130	Dosage	yes	AA < AG < GG for dosing. After correction for multiple testing, the difference between AA and GG was significant.	Allele A is associated with decreased dose of buprenorphine, dihydrocodeine, fentanyl, hydromorphone, methadone, morphine, oxycodone, piritramide, tilidine or tramadol in people with Pain as compared to allele G.	A			Is	Associated with	decreased	dose of	or	in people with	Disease:Pain		G		0.21	0.45	0.44	0.27		0.24	0.445	SNP sin predominancia en alguna población	rs1045642-A
1183685564	1183685572	cohort	105		LYBI cohort, published in Newcorn 2008, received an acute, randomized, double-blind treatment of 0.8–1.8¿mg/kg per day of atomoxetine for 6 weeks followed by an 8-month double-blind continuation phase	Study Cohort					< 0.01	OR	3.1	1.4	6.9	Multiple groups	rs12708954	SLC6A2	atomoxetine	19387424	Efficacy	yes		Allele A is associated with increased response to atomoxetine in children with Attention Deficit Disorder with Hyperactivity as compared to allele C.	A	Pediatric		Is	Associated with	increased	response to		in children with	Disease:Attention Deficit Disorder with Hyperactivity		C		0.571	0.116	0.133		0.139	0.571	0.129333	SNP sin predominancia en alguna población	rs12708954-A
1183689393	1183689398	cohort, prospective	206		warfarin maintenance at 360 days	Study Cohort	0.267	T			= 0.04	OR				Multiple groups, subgroups according to the Brazilian Census, as White, Intermediate (meaning Brown, Pardo in Portuguese), or Black.	rs9923231	VKORC1	warfarin	22990331	Dosage	yes	The analysis was preformed across the VKORC1 genotype. "Patients carrying VKORC1 variants ... lower weekly dose at the end of follow-up of 360 days, independently of target INR range, compared to patients carrying VKORC1 wild-type genotype..." Comparison based on Figure 2 - CC vs CT vs TT p=0.04 at 360 days warfarin dose; similar results for 30, 60, 180 days but not significant for 7-10 days.	Allele T is associated with decreased dose of warfarin as compared to allele C.	T			Is	Associated with	decreased	dose of					C		0.5	0.326	0.42	0.145	0.377	0.3225	0.374333	SNP sin predominancia en alguna población	rs9923231-T
1183699283	1183699300	cohort	199			Unknown					< 0.05	OR				Unknown	rs1800795	IL6	adalimumab, etanercept, infliximab	24253594	Efficacy	yes		Allele G is associated with increased response to adalimumab, etanercept or infliximab in people with Arthritis, Rheumatoid as compared to allele C.	G			Is	Associated with	increased	response to	or	in people with	Disease:Rheumatoid arthritis		C		0.941	0.753	0.713	0.95	0.217	0.9455	0.561	SNP sin predominancia en alguna población	rs1800795-G
1183699320	1183699322	cohort, retrospective	92		Patients who had undergone total hip or knee arthroplasty.	Study Cohort	0.082	C			< 0.001	OR				Multiple groups, patients at Washington University Medical Center. 79 White;13 African-American.	rs1057910	CYP2C9	warfarin	17387222	Dosage	yes	C (*3) was associated with 38.1 %(95% CI 29.3 -45.7%) reduction in therapeutic dose (defined as the dose that gave an INR in the target therapeutic range after 7 consecutive days) per copy.	Allele C is associated with decreased dose of warfarin in people with total knee or hip arthroplasty as compared to allele A.	C			Is	Associated with	decreased	dose of		in people with	Other:total knee or hip arthroplasty		A		0.5	0.058	0.064	0.01		0.255	0.061	SNP sin predominancia en alguna población	rs1057910-C
1183699325	1183699327	cohort, retrospective	92		Patients who had undergone total hip or knee arthroplasty.	Study Cohort	0.14	T			= 0.001	OR				Multiple groups, patients at Washington University Medical Center. 79 White;13 African-American.	rs1799853	CYP2C9	warfarin	17387222	Dosage	yes	T (*2) was associated with 17.4 %(95% CI 8.3-25.6%) reduction in therapeutic dose (defined as the dose that gave an INR in the target therapeutic range after 7 consecutive days) per copy.	Allele T is associated with decreased dose of warfarin in people with total knee or hip arthroplasty as compared to allele C.	T			Is	Associated with	decreased	dose of		in people with	Other:total knee or hip arthroplasty		C			0.089	0.122	0.035		0.035	0.1055	SNP sin predominancia en alguna población	rs1799853-T
1183700033	1183700054	cohort	141		Indication for treatment: atrial fibrillation-82;deep vein thrombosis-9;aortic valve prosthesis-15;mitralic valve prosthesis-12;ictus-5;other-18.	Study Cohort	0.83	T			= 0.005	OR				European	rs2108622	CYP4F2	warfarin	19207028	Dosage	yes	MWWD (Mean weekly warfarin dose): CC 20.54 mg/wk;CT: 24.19 mg/wk;TT:38.44 mg/wk. About 7% of mean weekly warfarin dose variance is explained by the genotype at this SNP.	Allele T is associated with increased dose of warfarin as compared to allele C.	T			Is	Associated with	increased	dose of					C		0.556	0.275	0.282	0.075	0.278	0.3155	0.278333	SNP sin predominancia en alguna población	rs2108622-T
1183700228	1183700237	cohort	181		warfarin	Drug	0.28	T			= 0.02	OR				Unknown	rs2108622	CYP4F2	warfarin	19297519	Dosage	yes	TT > CT > CC.	Allele T is associated with increased dose of warfarin as compared to allele C.	T			Is	Associated with	increased	dose of					C		0.556	0.275	0.282	0.075	0.278	0.3155	0.278333	SNP sin predominancia en alguna población	rs2108622-T
1183700756	1183700758	cohort	969		warfarin	Drug					< 0.001	OR				Multiple groups, 84.4% Caucasian;9.8% African ancestry;2.9% Asian;2.9% other.	rs9923231	VKORC1	warfarin	20375999	Dosage	yes	Each T allele resulted in a 20% (17-23%) decrease in therapeutic dose on Day 4 or 5 of therapy.	Allele T is associated with decreased dose of warfarin as compared to allele C.	T			Is	Associated with	decreased	dose of					C		0.5	0.326	0.42	0.145	0.377	0.3225	0.374333	SNP sin predominancia en alguna población	rs9923231-T
1183700770	1183700804	cohort	320		Debrisoquine hydroxylation was studied.	Study Cohort					< 0.05	OR				Unknown	rs1080985	CYP2D6	debrisoquine	24279852	Metabolism/PK	yes	The metabolic ratio was significantly lower in individuals with the C allele for carriers of one or two active CYP2D6 genes (both significant at p<0.05). Please note; alleles have been complemented to the plus chromosomal strand (variant was described as -1584C>G).	Allele C is associated with increased metabolism of debrisoquine in healthy individuals as compared to allele G.	C			Is	Associated with	increased	metabolism of		in healthy individuals			G		0.059	0.352		0.095	0.231	0.077	0.2915	SNP sin predominancia en alguna población	rs1080985-C
1183701155	1183701157	cohort, prospective	1293		patients starting warfarin; from WARG study	Drug	0.39	T			< 0.05	OR				European	rs9923231	VKORC1	warfarin	18574025	Dosage	yes	This SNP explained 29% (P = 1.03 x 10(-97)) of the variation in warfarin dose.	Allele T is associated with decreased dose of warfarin.	T			Is	Associated with	decreased	dose of							0.5	0.326	0.42	0.145	0.377	0.3225	0.374333	SNP sin predominancia en alguna población	rs9923231-T
1183701268	1183701270	cohort, prospective	1292		patients starting warfarin; from WARG study	Drug	0.39	A			< 0.05	OR				European	rs2359612	VKORC1	warfarin	18574025	Dosage	yes	This SNP explained 30% (P = 9.82 x 10(-100)) of the variation in warfarin dose. The direction of the allele:dose relationship is not stated.	Allele A is associated with dose of warfarin.	A			Is	Associated with		dose of							0.18	0.47	0.44	0.23	0.41	0.205	0.44	SNP sin predominancia en alguna población	rs2359612-A
1183701274	1183701276	cohort, prospective	1092		patients starting warfarin;from WARG study	Drug					< 0.05	OR				European	rs4917639	CYP2C9	warfarin	18574025	Dosage	yes	This SNP explained 12% (P = 4.61 x 10(-30)) of the variation in warfarin dose. The direction of the allele:dose relationship is not given.	Allele A is associated with dose of warfarin.	A			Is	Associated with		dose of							0.5	0.91	0.8	0.8	0.81	0.65	0.84	SNP sin predominancia en alguna población	rs4917639-A
1183701285	1183701287	cohort, prospective	1092		patients starting warfarin;from WARG study	Drug					< 0.05	OR				European	rs3814637	CYP2C19	warfarin	18574025	Dosage	yes	This SNP explained 0.7% (P = 2.2 x 10(-6)) of the variation in warfarin dose. The direction of the allele:dose relationship is not given.	Allele C is associated with dose of warfarin.	C			Is	Associated with		dose of							0.5	0.97	0.93	0.9		0.7	0.95	SNP sin predominancia en alguna población	rs3814637-C
1183701300	1183701304	cohort	137		patients receiving maintenance warfarin therapy	Drug	0.36	A			< 0.05	OR				European	rs9923231	VKORC1	warfarin	19679631	Dosage, Efficacy	yes	The plasma S-warfarin concentration required to yield the target INR response for each genotype: CC, 0.68 mg/L; TC, 0.48 mg/L; TT, 0.27 mg/L.	Allele T is associated with increased response to warfarin as compared to allele C.	T			Is	Associated with	increased	response to					C		0.5	0.326	0.42	0.145	0.377	0.3225	0.374333	SNP sin predominancia en alguna población	rs9923231-T
1183701305	1183701307	cohort	137		patients receiving maintenance warfarin therapy	Drug	0.36	A			< 0.05	OR				European	rs9923231	VKORC1	warfarin	19679631	Dosage, Efficacy	yes	CC individuals required a daily maintenance dose of S-warfarin of 5.2 mg/day; TC individuals required 4.1 mg/day, and TT individuals required 2.4 mg/day.	Allele C is associated with increased dose of warfarin as compared to allele T.	C			Is	Associated with	increased	dose of					T		0.5	0.67	0.58	0.85	0.62	0.675	0.623333	SNP sin predominancia en alguna población	rs9923231-C
1183701524	1183701526	cohort	246		patients at Ottawa Hospital Thrombosis Clinic	Disease	0.4	A			< 0.0001	OR				Multiple groups, 94% were White (all were patients at Ottawa Hospital Thrombosis Clinic).	rs9923231	VKORC1	warfarin	20421126	Dosage	yes	The study purpose was to develop a model for stable maintenance warfarin dose prediction. Most patients had a history of venous thromboembolism. TT patients required a lower dose than TC patients, who required a lower dose than CC patients.	Allele T is associated with decreased dose of warfarin in people with venous thromboembolism as compared to allele C.	T			Is	Associated with	decreased	dose of		in people with	Disease:Venous thromboembolism		C		0.5	0.326	0.42	0.145	0.377	0.3225	0.374333	SNP sin predominancia en alguna población	rs9923231-T
1183701528	1183701530	cohort	246		patients at Ottawa Hospital Thrombosis Clinic	Disease	0.3	T			< 0.0002	OR				Multiple groups, 94% were White (all were patients at Ottawa Hospital Thrombosis Clinic).	rs2108622	CYP4F2	warfarin	20421126	Dosage	yes	The study purpose was to develop a model for stable maintenance warfarin dose prediction. Most patients had a history of venous thromboembolism. CC patients required a slightly lower dose than CT patients, who required a lower dose than TT patients.	Allele C is associated with decreased dose of warfarin in people with venous thromboembolism as compared to allele T.	C			Is	Associated with	decreased	dose of		in people with	Disease:Venous thromboembolism		T		0.44	0.73	0.72	0.93	0.72	0.685	0.723333	SNP sin predominancia en alguna población	rs2108622-C
1183702665	1183702889	cohort, clinical trial	61		asthma	Disease					< 0.05	OR				European	rs8191992	CHRM2	fluticasone/salmeterol	22370858	Efficacy	yes	The "major" allele is associated with increased response. It is not clear whether that is A or T on the positive chromosomal strand.	Allele A is associated with response to fluticasone/salmeterol in people with Asthma as compared to allele T.	A			Is	Associated with		response to		in people with	Disease:Asthma		T		0.828	0.279	0.457	0.695	0.442	0.7615	0.392667	SNP predominantes en ancestría africana	rs8191992-A
1183703247	1183703249	cohort, clinical trial	61		asthma	Disease					< 0.05	OR				European	rs6962027	CHRM2	fluticasone/salmeterol	22370858	Efficacy	yes	The "major" allele is associated with increased response. It is not clear whether that is A or T on the positive chromosomal strand.	Allele A is associated with response to fluticasone/salmeterol in people with Asthma as compared to allele T.	A			Is	Associated with		response to		in people with	Disease:Asthma		T		0.828	0.25	0.457		0.555	0.828	0.420667	SNP predominantes en ancestría africana	rs6962027-A
1183703276	1183703278	cohort, clinical trial	61		asthma	Disease					< 0.05	OR				European	rs6962027	CHRM2	fluticasone/salmeterol	22370858	Efficacy	yes	The "major" allele is associated with increased response. It is not clear whether that is A or T on the positive chromosomal strand.	Allele A is associated with response to fluticasone/salmeterol in people with Asthma as compared to allele T.	A			Is	Associated with		response to		in people with	Disease:Asthma		T		0.828	0.25	0.457		0.555	0.828	0.420667	SNP predominantes en ancestría africana	rs6962027-A
1183703293	1183703295	cohort, clinical trial	63		asthma	Disease	0.156	G			< 0.05	OR				European	rs739645	CRHR1	fluticasone propionate	22370858	Efficacy	yes	The minor allele is reported to be associated with increased response.	Allele G is associated with increased response to fluticasone propionate in people with Asthma as compared to allele T.	G			Is	Associated with	increased	response to		in people with	Disease:Asthma		T		0.5	0.025	0.181		0.166	0.5	0.124	SNP sin predominancia en alguna población	rs739645-G
1183703305	1183703307	cohort, clinical trial	63		asthma	Disease	0.159	T			< 0.05	OR				European	rs1876831	CRHR1	fluticasone propionate	22370858	Efficacy	yes	The minor allele is reported to be associated with increased response. dbSNP lists T as the minor allele in CEU.	Allele T is associated with increased response to fluticasone propionate in people with Asthma as compared to allele C.	T			Is	Associated with	increased	response to		in people with	Disease:Asthma		C		0.5	0.119	0.181			0.5	0.15	SNP sin predominancia en alguna población	rs1876831-T
1183703309	1183703311	cohort, clinical trial	63		asthma	Disease	0.156	C			< 0.05	OR				European	rs1876829	CRHR1	fluticasone propionate	22370858	Efficacy	yes	The minor allele is reported to be associated with increased response. dbSNP lists C as the minor allele in a CEU panel.	Allele C is associated with increased response to fluticasone propionate in people with Asthma as compared to allele T.	C			Is	Associated with	increased	response to		in people with	Disease:Asthma		T		0.5	0.125	0.181	0.015	0.166	0.2575	0.157333	SNP sin predominancia en alguna población	rs1876829-C
1183703313	1183703315	cohort, clinical trial	63		asthma	Disease	0.154	A			< 0.05	OR				European	rs1876828	CRHR1	fluticasone propionate	22370858	Efficacy	yes	The minor allele is reported to be associated with increased response. dbSNP lists A as the minor allele in a CEU panel. Please note alleles have been complemented to the plus chromosomal strand.	Allele T is associated with increased response to fluticasone propionate in people with Asthma as compared to allele C.	T			Is	Associated with	increased	response to		in people with	Disease:Asthma		C		0.5	0.123	0.181	0.015		0.2575	0.152	SNP sin predominancia en alguna población	rs1876828-T
1183703678	1183703684	meta-analysis	337		Meta-analysis sample, increased likelihood of being a responder. Patients taking memantine were excluded.	Study Cohort					= 6.74E-6	OR	0.38	0.25	0.58	European	rs17798800		donepezil, galantamine, rivastigmine	23374588	Efficacy	yes	The study contained a discovery sample and a replication sample, and also did a meta-analysis of the two samples together. Response is defined as patients whose mini-mental state examination (MMSE) points increased, remained stable, or the delta MMSE fell by 1 or less. Non-responders were defined as worsening of >3 points on the MMSE. Please note alleles have been complemented to the plus chromos…	Allele T is associated with decreased response to donepezil, galantamine and rivastigmine in people with Alzheimer Disease as compared to allele C.	T			Is	Associated with	decreased	response to	and	in people with	Disease:Alzheimer Disease		C		0.6	0.043	0.154		0.107	0.6	0.101333	SNP sin predominancia en alguna población	rs17798800-T
1183944307	1183944314	cohort	99		Covariate analysis was performed using a forward selection ad backward elimination. The genetic covariate rs3842 T>C was included in a stepwise forward selection with two and three degrees of freedom, and a change in OFV by at least 5.99 and 7.81 respectively corresponded to a p-value <0.05 in a chi-squared distribution. Change in objective function value was 15.883	Study Cohort					= 0.0012	OR				Sub-Saharan African	rs3842	ABCB1	efavirenz	24497997	Metabolism/PK	yes	Steady-state plasma concentration from HIV infected patients treated with EFV were used to calculate baseline biochemistries, CD4 counts, and viral load. The authors used non-linear mixed effect modeling to created a PK model of efavirenz. Significant covariates predicted to affect PK of efavirenz were included in the final model. rs3842 T>C was considered a significant factor in covariate analys…	Allele C is associated with metabolism of efavirenz in people with HIV Infections as compared to allele T.	C			Is	Associated with		metabolism of		in people with	Disease:HIV infectious disease		T		0.643	0.077	0.133	0.096	0.114	0.3695	0.108	SNP sin predominancia en alguna población	rs3842-C
1183960686	1183960688				In vitro assays. Responses measured: channel open probability, single channel current amplitude at 80mV, chloride transport.	Study Cohort					< 0.05	Unknown				Unknown	rs121908755	CFTR	ivacaftor	22293084	Efficacy	yes	as compared to baseline. In vitro assays using transfected Fisher Rat Thyroid cells expressing CFTR. Before treatment, cells were activated by exposure to PKA and ATP before ivacaftor treatment. Cells expressing S549N-CFTR (rs121908755 allele A) responded to ivacaftor treatment as measured by a significantly enhanced channel open probability and increased chloride transport. Single channel curren…	Allele A is associated with increased response to ivacaftor.	A			Is	Associated with	increased	response to									0	0		0	0	SNP sin predominancia en alguna población	rs121908755-A
1183960702	1183960704				In vitro assays. Responses measured: channel open probability, single channel current amplitude at 80mV, chloride transport.	Study Cohort					< 0.05	Unknown				Unknown	rs267606723	CFTR	ivacaftor	22293084	Efficacy	yes	as compared to baseline. In vitro assays using transfected Fisher Rat Thyroid cells expressing CFTR. Before treatment, cells were activated by exposure to PKA and ATP before ivacaftor treatment. Cells expressing G1244E-CFTR (rs267606723 allele A) responded to ivacaftor treatment as measured by a significantly enhanced channel open probability and increased chloride transport. Single channel curre…	Allele A is associated with increased response to ivacaftor.	A			Is	Associated with	increased	response to										0		0		SNP sin predominancia en alguna población	rs267606723-A
1183960706	1183960708				In vitro assays. Responses measured: channel open probability, single channel current amplitude at 80mV, chloride transport.	Study Cohort					< 0.05	Unknown				Unknown	rs74503330	CFTR	ivacaftor	22293084	Efficacy	yes	as compared to baseline. In vitro assays using transfected Fisher Rat Thyroid cells expressing CFTR. Before treatment, cells were activated by exposure to PKA and ATP before ivacaftor treatment. Cells expressing S1251N-CFTR (rs74503330 allele A) responded to ivacaftor treatment as measured by a significantly enhanced channel open probability and increased chloride transport. Single channel curren…	Allele A is associated with increased response to ivacaftor.	A			Is	Associated with	increased	response to										0		0		SNP sin predominancia en alguna población	rs74503330-A
1184086271	1184086273	cohort, prospective	85		Metastatic breast cancer (MBC) patients without prior chemotherapy for MBC, detectable brain parenchymal, and/or leptomeningeal metastases, prior gemcitabine therapy, and HER2 + breast cancer with trastuzumab treatment.. Reported allele frequencies are for rs760370	Disease	0.735	A	0.265	G	> 0.05	HR	3.391	1.13	10.19	East Asian	rs760370	SLC29A1	gemcitabine, paclitaxel	24361227	Efficacy	yes	This SNP is part of a two SNP haplotype with rs747199 G allele. Together they are associated with a significantly shorter overall survival, however the results did not remain significant in multivariate analysis.; SNPs with an uncorrected p-value from univariate analysis were then included in a multivariate analysis and Bonferroni method was used to adjust for multiple hypotheses testing. The ini…	Allele A is associated with decreased response to gemcitabine and paclitaxel in women Breast Neoplasms as compared to allele G.	A			Is	Associated with	decreased	response to	and	in women	Disease:Breast Neoplasms		G		0.42	0.61	0.6		0.65	0.42	0.62	SNP sin predominancia en alguna población	rs760370-A
1184165220	1184165224	cohort	111		Mean age = 9.6 +/- 2.2.	Age Group					= 0.0048	OR	2.66	1.35	5.26	East Asian	rs3785143	SLC6A2	atomoxetine	23266789	Efficacy	yes	The T allele was associated with being a non-responder to atomoxetine treatment. Children were given the drug for 8 - 12 weeks. Response was defined as at least a 25% decrease from baseline on the ADHD-RS-IV total score. No association was seen with remission. Multiple test correction still gave a significant p-value (p=0.0416).	Allele T is associated with decreased response to atomoxetine in children with Attention Deficit Disorder with Hyperactivity as compared to allele C.	T	Pediatric		Is	Associated with	decreased	response to		in children with	Disease:Attention Deficit Disorder with Hyperactivity		C		0.5	0.061	0.122	0.04	0.101	0.27	0.0946667	SNP sin predominancia en alguna población	rs3785143-T
1184167161	1184167163	cohort, case series, prospective	18		healthy individuals	Study Cohort	0.5	A			< 0.05	OR				European	rs4244285	CYP2C19	clopidogrel	24710841	Metabolism/PK	yes	Assays done in blood samples of six each of *1/*1 (EM/GG),*1/*2(IM/AG) and *2/*2(PM/AA) [based on only assaying for *2; 2 EMs were *1/*17 and one IM was a *2/*17] were compared for MPA4 (maximal platelet aggregation 4 hrs post-dose) and for active metabolite area under the curve. For the EMs, this result was significant for both the 150 and 300 mg/day doses; for the IMs and PMs, it was significan…	Allele A (assigned as poor metabolizer phenotype) is associated with increased dose of clopidogrel in healthy individuals as compared to allele G (assigned as normal metabolizer phenotype) .	A		poor metabolizer	Is	Associated with	increased	dose of		in healthy individuals			G	normal metabolizer	0.5	0.087	0.106	0.14	0.114	0.32	0.102333	SNP sin predominancia en alguna población	rs4244285-A
1184169928	1184169935	cohort, replication	200		initial and replication cohort combined at 3month (after Bonferroni's correction)	Study Cohort					= 0.022	OR				Unknown	rs1801274	FCGR2A	infliximab	24667440	Efficacy	yes	Association only existing for the time point at 3 month but not for later time points 6 and 12 month. Response was determined using European League Against Rheumatism (EULAR) criteria.	Allele G is associated with decreased response to infliximab in people with Arthritis, Rheumatoid as compared to allele A.	G			Is	Associated with	decreased	response to		in people with	Disease:Rheumatoid arthritis		A		0.696	0.466	0.394	0.495		0.5955	0.43	SNP sin predominancia en alguna población	rs1801274-G
1184175118	1184175123	cohort	122		Patients with newly diagnosed AML from Rui Jin Hospital (Shanghai Second Medical University). Reported p-value is for the difference in genotype distribution between responders and non-responders	Study Cohort	0.844	C	0.156	G	= 0.025	OR				Unknown	rs80143932	DCK	cytarabine, idarubicin	15564883	Efficacy	yes	Patients were divided into "good responders" and "poor responders" and frequencies of haplotypes were compared between groups. Good responders were those that went into complete remission with the first induction of AraC and idarubicin and remained relapse free for at least 6 months afterwards.; Among the patients there were three compound haplotypes at rs80143932 and rs2306744: CC/CC, CG/CT, and…	Allele G is associated with increased response to cytarabine and idarubicin in people with Leukemia, Myeloid, Acute as compared to allele C.	G			Is	Associated with	increased	response to	and	in people with	Disease:Leukemia, Myeloid, Acute		C		0.5	0.042	0.064		0.045	0.5	0.0503333	SNP sin predominancia en alguna población	rs80143932-G
1184175124	1184175126	cohort	122		Patients with newly diagnosed AML from Rui Jin Hospital (Shanghai Second Medical University). Reported p-value is for the difference in genotype distribution between responders and non-responders	Study Cohort	0.844	C	0.156	T	= 0.025	OR				Unknown	rs2306744	DCK	cytarabine, idarubicin	15564883	Efficacy	yes	Patients were divided into "good responders" and "poor responders" and frequencies of haplotypes at rs80143932 and rs2306744 were compared between groups. Good responders were those that went into complete remission with the first induction of AraC and idarubicin and remained relapse free for at least 6 months afterwards.; Among the patients there were three compound haplotypes at rs80143932 and …	Allele T is associated with increased response to cytarabine and idarubicin in people with Leukemia, Myeloid, Acute as compared to allele C.	T			Is	Associated with	increased	response to	and	in people with	Disease:Leukemia, Myeloid, Acute		C		0.5	0.052	0.064			0.5	0.058	SNP sin predominancia en alguna población	rs2306744-T
1184175504	1184175508	cohort	112		P-values indicate the significance of the difference in MTX plasma concentration between patients with at least one copy of the T allele, and no copies of the T allele at 48 hours after initiation of MTX infusion. Patients with at least one copy of the T allele had a higher concentration than patients that were homozygous for the C allele (CC).	Disease	0.37	T	0.63	C	< 0.05	OR				East Asian	rs717620	ABCC2	methotrexate	24404132	Metabolism/PK	yes	All patients received four cycles of high dose MTX (5000mg per square meter of body surface area). 1/10th of the dose was administered over 30 minutes (rapid infusion) and the rest was administered continuously over 24hrs. Leucovorin rescue was administered every 6hrs starting 48 hrs after initiation of MTX infusion.	Allele T is associated with decreased clearance of methotrexate in children with Precursor Cell Lymphoblastic Leukemia-Lymphoma as compared to allele C.	T	Pediatric		Is	Associated with	decreased	clearance of		in children with	Disease:Acute lymphoblastic leukemia		C		0.389	0.149	0.181	0.06	0.157	0.2245	0.162333	SNP sin predominancia en alguna población	rs717620-T
1184467517	1184467521	cohort	84		Participants of AIDS Clinical Trials Group (ACTG) protocols who were randomized to efavirenz-containing regimens. All were CYP2B6 slow metabolizers.	Study Cohort					= 0.00038	OR				Multiple groups, Self-identified as Black, White or Hispanic.	rs28399433	CYP2A6	efavirenz	24729586	Metabolism/PK	yes	As measured by increased plasma concentrations in patients with the AC genotype compared to the CC genotype. One White subject had the C on one allele and a CYP2A6 deletion of the other allele. When this subject was removed from univariate analysis the association with this SNP remained (p=9.4x10-4). *Note: All participants were CYP2B6 slow metabolizers (defined by the following genotypes of two …	Allele C is associated with decreased metabolism of efavirenz in people with HIV Infections as compared to allele A.	C			Is	Associated with	decreased	metabolism of		in people with	Disease:HIV infectious disease		A		0.167	0.123	0.101	0.11	0.102	0.1385	0.108667	SNP sin predominancia en alguna población	rs28399433-C
1184467538	1184467544	cohort	84		Participants of AIDS Clinical Trials Group (ACTG) protocols who were randomized to efavirenz-containing regimens. All were CYP2B6 slow metabolizers. Statistics here are for a multivariate linear regression model that included CYP2A6 rs28399433, UGT2B7 rs28365062 and CYP2B6 rs28399499 which explained 22% variance in efavirenz plasma concentrations.	Study Cohort					= 0.004	OR				Multiple groups, Self-identified as Black, White or Hispanic.	rs28399499	CYP2B6	efavirenz	24729586	Metabolism/PK	yes	A multivariate linear regression model that included CYP2A6 rs28399433, UGT2B7 rs2365062 and CYP2B6 rs28399499 explained 22% variance in efavirenz plasma concentrations. *Note: All participants were CYP2B6 slow metabolizers (defined by the following genotypes of two SNPs: rs3745274 TT, or rs3745274 T/rs28399499 C or rs28399499 CC).* Alleles have been complemented to the plus chromosomal strand.	Allele C is associated with metabolism of efavirenz in people with HIV Infections as compared to allele T.	C			Is	Associated with		metabolism of		in people with	Disease:HIV infectious disease		T		0.5	0.019	0.011	0.075	0.01	0.2875	0.0133333	SNP sin predominancia en alguna población	rs28399499-C
1184468819	1184468821	cohort	95			Unknown					= 2.0E-7	OR				Multiple groups	rs4646458		tacrolimus	21047202	Dosage	yes	Please note; this SNP was found to be significantly associated with stable tacrolimus dose, but the specific allele associated with this was not defined. Bonferroni-corrected p-value threshold of <8.46 x10E-5	Allele G is associated with dose of tacrolimus in people with Kidney Transplantation as compared to allele T.	G			Is	Associated with		dose of		in people with	Disease:Kidney Transplantation		T		0.579	0.151	0.133	0.46	0.157	0.5195	0.147	SNP sin predominancia en alguna población	rs4646458-G
1184468824	1184468826	cohort	95			Unknown					= 1.12E-11	OR				Multiple groups	rs4646457		tacrolimus	21047202	Dosage	yes	Please note; this SNP was found to be significantly associated with stable tacrolimus dose, but the specific allele associated with this was not defined. Bonferroni-corrected p-value threshold of <8.46 x10E-5	Allele C is associated with dose of tacrolimus in people with Kidney Transplantation as compared to allele A.	C			Is	Associated with		dose of		in people with	Disease:Kidney Transplantation		A		0.848	0.237	0.191	0.635	0.252	0.7415	0.226667	SNP sin predominancia en alguna población	rs4646457-C
1184468829	1184468831	cohort	95			Unknown					= 1.27E-10	OR				Multiple groups	rs15524	CYP3A5	tacrolimus	21047202	Dosage	yes	Please note; this SNP was found to be significantly associated with stable tacrolimus dose, but the specific allele associated with this was not defined. Bonferroni-corrected p-value threshold of <8.46 x10E-5	Allele G is associated with dose of tacrolimus in people with Kidney Transplantation as compared to allele A.	G			Is	Associated with		dose of		in people with	Disease:Kidney Transplantation		A		0.788	0.223	0.176	0.57	0.235	0.679	0.211333	SNP sin predominancia en alguna población	rs15524-G
1184468838	1184468840	cohort	95			Unknown					= 6.3E-6	OR				Multiple groups	rs12333983	CYP3A4	tacrolimus	21047202	Dosage	yes	Please note; this SNP was found to be significantly associated with stable tacrolimus dose, but the specific allele associated with this was not defined. Bonferroni-corrected p-value threshold of <8.46 x10E-5	Allele A is associated with dose of tacrolimus in people with Kidney Transplantation as compared to allele T.	A			Is	Associated with		dose of		in people with	Disease:Kidney Transplantation		T		0.871	0.036	0.191			0.871	0.1135	SNP predominantes en ancestría africana	rs12333983-A
1184470287	1184470293	cohort	54		Organ transplant patients undergoing therapeutic drug monitoring treated with either cyclosporine or tacrolimus and in combination with mycophenolate, steroids, and proton pump inhibitors. Doses of calcineurin inhibitors were adjusted to achieve target ranges	Study Cohort	0.026	A	0.94	G	< 0.01	OR				Unknown	rs35599367	CYP3A4	cyclosporine	24658827	Metabolism/PK	yes	A single steady-state concentration of cyclosporine was collected for each patient 2-7 wks post-transplant and compared to dose of cyclosporine administered to patients at Oslo University Hospital. Reported concentrations are "steady-state dose-adjusted concentration" of cyclosporine. Steady-state is defined as at least 3 days after last dose adjustment for Tac and 4 days for cyclosporine.	Allele A is associated with decreased metabolism of cyclosporine in people with Kidney Transplantation as compared to allele G.	A			Is	Associated with	decreased	metabolism of		in people with	Other:Kidney Transplantation		G			0.043	0.027		0.027		0.0323333	SNP sin predominancia en alguna población	rs35599367-A
1184470358	1184470367	cohort	123		Organ transplant patients undergoing therapeutic drug monitoring treated with either cyclosporine or tacrolimus and in combination with mycophenolate, steroids, and proton pump inhibitors. Doses of calcineurin inhibitors were adjusted to achieve target ranges	Study Cohort	0.26	G	0.74	A	= 0.02	OR				Unknown	rs4823613	PPARA	tacrolimus	24658827	Metabolism/PK	yes	A single steady-state concentration of tacrolimus was collected for each patient 2-7 wks post-transplant and compared to dose of tacrolimus administered to patients at Oslo University Hospital. Reported concentrations are "steady-state dose-adjusted concentration" of tacrolimus. Steady-state is defined as at least 3 days after last dose adjustment for Tac and 4 days for cyclosporine.	Allele G is associated with decreased metabolism of tacrolimus in people with Kidney Transplantation as compared to allele A.	G			Is	Associated with	decreased	metabolism of		in people with	Other:Kidney Transplantation		A		0.562	0.159	0.309	0.369	0.322	0.4655	0.263333	SNP sin predominancia en alguna población	rs4823613-G
1184470380	1184470385	cohort	123		Organ transplant patients undergoing therapeutic drug monitoring treated with either cyclosporine or tacrolimus and in combination with mycophenolate, steroids, and proton pump inhibitors. Doses of calcineurin inhibitors were adjusted to achieve target ranges.	Study Cohort	0.32	T	0.68	C	= 0.04	OR				Unknown	rs1057868	POR	tacrolimus	24658827	Metabolism/PK	yes	A single steady-state concentration of tacrolimus was collected for each patient 2-7 wks post-transplant and compared to dose of tacrolimus administered to patients at Oslo University Hospital. Reported concentrations are "steady-state dose-adjusted concentration" of tacrolimus. Steady-state is defined as at least 3 days after last dose adjustment for Tac and 4 days for cyclosporine.	Allele T is associated with increased metabolism of tacrolimus in people with Kidney Transplantation as compared to allele C.	T			Is	Associated with	increased	metabolism of		in people with	Other:Kidney Transplantation		C		0.526	0.328	0.346	0.27	0.308	0.398	0.327333	SNP sin predominancia en alguna población	rs1057868-T
1184471365	1184471367	cohort	45		Patients with HIV-infection, prescribed efavirenz, zidovudine and lamivudine anti-retroviral regimen. Composite CYP2B6 genotypes analysis: rs3745274 (516G>T) and rs28399499 (983T>C).	Study Cohort					< 0.001	Unknown				African American/Afro-Caribbean	rs28399499	CYP2B6	efavirenz	19659438	Metabolism/PK	yes	As determined by significantly higher efavirenz plasma levels. This SNP was only significant in composite analysis with rs3745274: extensive metabolizers were defined as having no variant alleles at positions 516 (allele G) or (983 allele T), intermediate metabolizers had a single variant at one of the positions but not both, slow metabolizers (described as "poor" here) had 2 variant alleles (eit…	Allele C (assigned as poor metabolizer phenotype) is associated with decreased metabolism of efavirenz in people with HIV Infections as compared to allele T (assigned as normal metabolizer phenotype) .	C		poor metabolizer	Is	Associated with	decreased	metabolism of		in people with	Disease:HIV infectious disease		T	normal metabolizer	0.5	0.019	0.011	0.075	0.01	0.2875	0.0133333	SNP sin predominancia en alguna población	rs28399499-C
1184471369	1184471371	cohort	45		Patients with HIV-infection, prescribed efavirenz, zidovudine and lamivudine anti-retroviral regimen. Composite CYP2B6 genotypes analysis: rs3745274 (516G>T) and rs28399499 (983T>C).	Study Cohort					< 0.001	Unknown				African American/Afro-Caribbean	rs3745274	CYP2B6	efavirenz	19659438	Metabolism/PK	yes	As determined by significantly higher efavirenz plasma levels. Composite analysis with rs3745274: extensive metabolizers were defined as having no variant alleles at positions 516 (allele G) or (983 allele T), intermediate metabolizers had a single variant at one of the positions but not both, slow metabolizers (described as "poor" here) had 2 variant alleles (either genotype 516TT, 983CC, or 516…	Allele T (assigned as poor metabolizer phenotype) is associated with decreased metabolism of efavirenz in people with HIV Infections as compared to allele G (assigned as normal metabolizer phenotype) .	T		poor metabolizer	Is	Associated with	decreased	metabolism of		in people with	Disease:HIV infectious disease		G	normal metabolizer	0.619	0.33	0.367	0.467	0.354	0.543	0.350333	SNP sin predominancia en alguna población	rs3745274-T
1184472218	1184472234	cohort	83			Unknown					< 0.05	OR				European	rs2032582	ABCB1	fluoxetine	24663076	Efficacy	yes	After 8 weeks of treatment T allele carriers showed higher improvements on the CDI (P=0.03), OCI-CV (P=0.001) and CGI-I (P<0.001) scales. After 12 weeks of treatment patients carrying the T allele showed significantly higher improvements in the OCI-CV (P=0.01) and SCARED (P=0.006) scales.	Allele A is associated with increased response to fluoxetine in children with Depressive Disorder as compared to allele C.	A	Pediatric		Is	Associated with	increased	response to		in children with	Disease:Depressive Disorder		C				0.46				0.46	SNP sin predominancia en alguna población	rs2032582-A
1184472424	1184472426	cohort	145		The mean patient age was 67 +/- 14 years; 90 (62%) were male. Eighty-two (57%) were Caucasian, 28 (19%) African-American, 20 (14%) Hispanic and 15 (10%) Asian. The median warfarin dose was 35 mg per week (interquartile range 23-53 mg per week). Gene-based dosing algorithms explained 37-55% of the variation in warfarin dose requirements.	Study Cohort					< 0.001	OR				Multiple groups	rs9923231	VKORC1	warfarin	20128861	Dosage	yes	Neither the addition of race, number of concurrent medications nor the number of concurrent medications interacting with warfarin enhanced algorithm performance. Similarly, consideration of CYP4F2, CALU or GGCX variant genotypes did not improve algorithms.	Allele T is associated with decreased dose of warfarin as compared to allele C.	T			Is	Associated with	decreased	dose of					C		0.5	0.326	0.42	0.145	0.377	0.3225	0.374333	SNP sin predominancia en alguna población	rs9923231-T
1184472429	1184472431	cohort	145		The mean patient age was 67 +/- 14 years; 90 (62%) were male. Eighty-two (57%) were Caucasian, 28 (19%) African-American, 20 (14%) Hispanic and 15 (10%) Asian. The median warfarin dose was 35 mg per week (interquartile range 23-53 mg per week). Gene-based dosing algorithms explained 37-55% of the variation in warfarin dose requirements.	Study Cohort					< 0.001	OR				Multiple groups	rs9934438	VKORC1	warfarin	20128861	Dosage	yes	Neither the addition of race, number of concurrent medications nor the number of concurrent medications interacting with warfarin enhanced algorithm performance. Similarly, consideration of CYP4F2, CALU or GGCX variant genotypes did not improve algorithms.	Allele A is associated with decreased dose of warfarin as compared to allele G.	A			Is	Associated with	decreased	dose of					G		0.5	0.405	0.42	0.145	0.377	0.3225	0.400667	SNP sin predominancia en alguna población	rs9934438-A
1184472436	1184472438	cohort	145		The mean patient age was 67 +/- 14 years; 90 (62%) were male. Eighty-two (57%) were Caucasian, 28 (19%) African-American, 20 (14%) Hispanic and 15 (10%) Asian. The median warfarin dose was 35 mg per week (interquartile range 23-53 mg per week). Gene-based dosing algorithms explained 37-55% of the variation in warfarin dose requirements.	Study Cohort					< 0.001	OR				Multiple groups	rs2359612	VKORC1	warfarin	20128861	Dosage	yes	Neither the addition of race, number of concurrent medications nor the number of concurrent medications interacting with warfarin enhanced algorithm performance. Similarly, consideration of CYP4F2, CALU or GGCX variant genotypes did not improve algorithms.	Allele A is associated with decreased dose of warfarin as compared to allele G.	A			Is	Associated with	decreased	dose of					G		0.18	0.47	0.44	0.23	0.41	0.205	0.44	SNP sin predominancia en alguna población	rs2359612-A
1184472447	1184472449	cohort	145		The mean patient age was 67 +/- 14 years; 90 (62%) were male. Eighty-two (57%) were Caucasian, 28 (19%) African-American, 20 (14%) Hispanic and 15 (10%) Asian. The median warfarin dose was 35 mg per week (interquartile range 23-53 mg per week). Gene-based dosing algorithms explained 37-55% of the variation in warfarin dose requirements.	Study Cohort					< 0.001	OR				Multiple groups	rs7294	VKORC1	warfarin	20128861	Dosage	yes	Neither the addition of race, number of concurrent medications nor the number of concurrent medications interacting with warfarin enhanced algorithm performance. Similarly, consideration of CYP4F2, CALU or GGCX variant genotypes did not improve algorithms.	Allele T is associated with increased dose of warfarin as compared to allele C.	T			Is	Associated with	increased	dose of					C		0.708	0.328	0.356	0.425	0.347	0.5665	0.343667	SNP sin predominancia en alguna población	rs7294-T
1184472932	1184472934	cohort	93			Unknown					= 0.020	OR				Multiple groups	rs7089580	CYP2C9	warfarin	24474498	Dosage	yes		Allele T is associated with decreased dose of warfarin in children as compared to allele A.	T	Pediatric		Is	Associated with	decreased	dose of		in children			A		0.5	0.125	0.128			0.5	0.1265	SNP sin predominancia en alguna población	rs7089580-T
1184473155	1184473158	cohort	62		In patients with HIV and TB infection. When EFV was combined with rifampicin-based anti-TB treatment (the cohort of patients taking EFV alone only had patients with the CC genotype).	Study Cohort	0.98	C			= 0.023	OR				Unknown	rs28399454	CYP2A6	efavirenz	24316028	Metabolism/PK	yes	Multivariate analysis showed that this SNP contributed significantly to variability of efavirenz plasma concentrations: CYP2A6 1093C>T (rs28399454), CYP2B6 516G>T (rs3745274), CYP2B6 983T>C (rs28399499) contributed 27%, 43%, and 29% of the total variance in efavirenz plasma levels, respectively. Association with different genotypes of this SNP and efavirenz levels was not carried out individually…	Allele T is associated with metabolism of efavirenz in people with HIV Infections as compared to allele C.	T			Is	Associated with		metabolism of		in people with	Disease:HIV infectious disease		C		0.5	0.005	0.011	0.1	0.017	0.3	0.011	SNP sin predominancia en alguna población	rs28399454-T
1184473161	1184473163	cohort	62		In patients with HIV and TB infection. When EFV was combined with rifampicin-based anti-TB treatment.	Study Cohort	0.68	G			= 0.0004	OR				Unknown	rs3745274	CYP2B6	efavirenz	24316028	Metabolism/PK	yes	Multivariate analysis showed that this SNP contributed significantly to variability of efavirenz plasma concentrations: CYP2A6 1093C>T (rs28399454), CYP2B6 516G>T (rs3745274), CYP2B6 983T>C (rs28399499) contributed 27%, 43%, and 29% of the total variance in efavirenz plasma levels, respectively.	Allele T is associated with metabolism of efavirenz in people with HIV Infections as compared to allele G.	T			Is	Associated with		metabolism of		in people with	Disease:HIV infectious disease		G		0.619	0.33	0.367	0.467	0.354	0.543	0.350333	SNP sin predominancia en alguna población	rs3745274-T
1184473165	1184473167	cohort	62		In patients with HIV and TB infection. When EFV was combined with rifampicin-based anti-TB treatment.	Study Cohort	0.92	T			= 0.016	OR				Unknown	rs28399499	CYP2B6	efavirenz	24316028	Metabolism/PK	yes	Multivariate analysis showed that this SNP contributed significantly to variability of efavirenz plasma concentrations: CYP2A6 1093C>T (rs28399454), CYP2B6 516G>T (rs3745274), CYP2B6 983T>C (rs28399499) contributed 27%, 43%, and 29% of the total variance in efavirenz plasma levels, respectively. The TT genotype was associated with higher efavirenz levels compared to TC over the 6 weeks of treatme…	Allele C is associated with metabolism of efavirenz in people with HIV Infections as compared to allele T.	C			Is	Associated with		metabolism of		in people with	Disease:HIV infectious disease		T		0.5	0.019	0.011	0.075	0.01	0.2875	0.0133333	SNP sin predominancia en alguna población	rs28399499-C
1184473321	1184473323	cohort	207		Patients were taking efavirenz for at least 2 weeks, were on HAART and 71% were also on at least one other drug.	Study Cohort	0.35	T			< 0.0001	OR				Latino	rs3745274	CYP2B6	efavirenz	23172109	Metabolism/PK	yes	The T allele was considered a high efavirenz plasma concentration-associated allele, along with rs2307424 allele C, and both were statistically significant predictors of efavirenz plasma concentrations in multivariate stepwise linear regression analysis.	Allele T is associated with decreased metabolism of efavirenz in people with HIV Infections.	T			Is	Associated with	decreased	metabolism of		in people with	Disease:HIV infectious disease				0.619	0.33	0.367	0.467	0.354	0.543	0.350333	SNP sin predominancia en alguna población	rs3745274-T
1184473325	1184473327	cohort	207		Patients were taking efavirenz for at least 2 weeks, were on HAART and 71% were also on at least one other drug.	Study Cohort	0.49	G			= 0.002	OR				Latino	rs2307424	NR1I3	efavirenz	23172109	Metabolism/PK	yes	The G allele was considered a high efavirenz plasma concentration-associated allele, along with rs3745274 allele T, and both were statistically significant predictors of efavirenz plasma concentrations in multivariate stepwise linear regression analysis. The NR1I3 gene is on the minus chromosomal strand: alleles have been complemented to the plus chromosomal strand.	Allele G is associated with decreased metabolism of efavirenz in people with HIV Infections.	G			Is	Associated with	decreased	metabolism of		in people with	Disease:HIV infectious disease				0.44	0.7	0.73	0.88	0.68	0.66	0.703333	SNP sin predominancia en alguna población	rs2307424-G
1184473580	1184473586	cohort	97			Unknown					= 0.02	OR				European	rs9923231	VKORC1	warfarin	25001883	Dosage	yes	with an approximate decrease of daily dose of 0.66mg.	Allele T is associated with decreased dose of warfarin in children as compared to allele C.	T	Pediatric		Is	Associated with	decreased	dose of		in children			C		0.5	0.326	0.42	0.145	0.377	0.3225	0.374333	SNP sin predominancia en alguna población	rs9923231-T
1184483081	1184483085	cohort	84			Unknown	0.346	A			= 0.0075	OR	2.995	1.448	6.226	European	rs1045642	ABCB1	cyclosporine	24889923	Efficacy	yes	The A allele was found to have a higher frequency in non-responders (0.58), as compared to responders (0.35). Significant after Bonferroni correction, and supported by haplotype analysis. After 3 months of therapy with cyclosporine, responders defined as those who had a change in The Psoriasis Area and Severity Index (PASI) of > 75%, and non-responders were defined as those with a change in PASI …	Allele A is associated with decreased response to cyclosporine in people with Psoriasis as compared to allele G.	A			Is	Associated with	decreased	response to		in people with	Disease:Psoriasis		G		0.21	0.45	0.44	0.27		0.24	0.445	SNP sin predominancia en alguna población	rs1045642-A
1184483453	1184483455	cohort	191			Unknown					< 0.001	OR				East Asian	rs7294	VKORC1	warfarin	23208322	Dosage	yes	This variant is evaluated along with CYP2C9 rs1057910 (*3) and ORM1 rs17650.	Allele C is associated with decreased dose of warfarin as compared to allele T.	C			Is	Associated with	decreased	dose of					T		0.29	0.67	0.64	0.57	0.65	0.43	0.653333	SNP sin predominancia en alguna población	rs7294-C
1184510128	1184510132	cohort	186			Unknown	0.016	A			< 0.05	OR				Multiple groups	rs61742245	VKORC1	warfarin	22266406	Dosage	yes	Individuals carrying the VKORC1 p.Asp36Tyr variant required elevated doses of warfarin (mean 10.0±1.5 mg/d; range 7.1-12.1 mg/d), despite having the low dose; VKORC1 c.-1639G>A allele. The VKORC1 p.Asp36Tyr variant explained 10.7% of warfarin dose variability after controlling for VKORC1 c.-1639G>A, CYP2C9 *2 and *3. Inclusion of the warfarin resistant p.Asp36Tyr allele in pharmacogenetic algorit…	Allele A is associated with increased dose of warfarin as compared to allele C.	A			Is	Associated with	increased	dose of					C				0	0	0.002	0	0.001	SNP sin predominancia en alguna población	rs61742245-A
1184512419	1184512423	cohort	103		Discovery cohort	Study Cohort	0.204	G			= 1.82E-8	OR				African American/Afro-Caribbean	rs7856096	FPGS	warfarin	25079360	Dosage	yes	In the discovery cohort the uncorrected p-value was 1.82E-8. P-values were adjusted using Bonferroni correction, with a significance cutoff of 3.22E-7 based on the 155,186 SNPs tested in the discovery cohort.	Allele G is associated with decreased dose of warfarin as compared to allele A.	G			Is	Associated with	decreased	dose of					A		0.545	0.037	0.011	0.185	0.033	0.365	0.027	SNP sin predominancia en alguna población	rs7856096-G
1184512426	1184512428	cohort	475		Discovery cohort	Study Cohort					= 3.93E-5	OR				African American/Afro-Caribbean	rs7856096	FPGS	warfarin	25079360	Dosage	yes	In the combined cohort each minor allele of rs7856096 contributed to -5.81 mg/week change in predicted dose (p= 3.93E-5) using the IWPC algorithm.	Allele G is associated with decreased dose of warfarin as compared to allele A.	G			Is	Associated with	decreased	dose of					A		0.545	0.037	0.011	0.185	0.033	0.365	0.027	SNP sin predominancia en alguna población	rs7856096-G
1184512440	1184512444	cohort	10		Patients with at least one G551D-CFTR allele were treated with ivacaftor (150mg every 12 hours) for 1 year. 80% patients were heterozygous for F508del (rs113993960). Statistics given for change in sweat chloride.	Study Cohort					= 0.023	OR				European	rs75527207	CFTR	ivacaftor	25049054	Efficacy	yes	Patients with at least one G551D-CFTR allele were recruited and treated with ivacaftor for one year. Mean weight and BMI improved at 6 months from baseline, but only mean weight was increased again at 12 months. Mean percentage FVC, FEV1 and FEF25-75% returned to baseline levels by 12 months of treatment.	Allele A is associated with response to ivacaftor in people with Cystic Fibrosis.	A			Is	Associated with		response to		in people with	Disease:Cystic Fibrosis							0		0		SNP sin predominancia en alguna población	rs75527207-A
1184512509	1184513244	cohort	105		Exploratory cohort. CI-MMR was 35% higher in patients with at least one copy of the G-G haplotype.	Study Cohort					< 0.001	OR				Unknown	rs12505410	ABCG2	imatinib	24123600	Efficacy	yes	As part of a haplotype with rs2725252: those with the G-C haplotype (rs12505410-rs2725252) had a significantly higher cumulative incidence major molecular response (CI-MMR) as compared to those with any other haplotype (i.e. G-A, T-C, T-A). This study was done in an exploratory cohort (n=105) and a validation cohort (n=239); within the validation cohort, patients were either taking a 400mg/day do…	Allele G is associated with increased response to imatinib in people with Leukemia, Myelogenous, Chronic, BCR-ABL Positive as compared to allele T.	G			Is	Associated with	increased	response to		in people with	Disease:Chronic myelogenous leukemia, BCR-ABL1 positive		T		0.5	0.192	0.383		0.342	0.5	0.305667	SNP sin predominancia en alguna población	rs12505410-G
1184513472	1184513474	cohort	105		Exploratory cohort. CI-MMR was 35% higher in patients with at least one copy of the G-G haplotype.	Study Cohort					< 0.001	OR				Unknown	rs2725252	ABCG2	imatinib	24123600	Efficacy	yes	As part of a haplotype with rs12505410: those with the G-C haplotype (rs12505410-rs2725252) had a significantly higher cumulative incidence major molecular response (CI-MMR) as compared to those with any other haplotype (i.e. G-A, T-C, T-A). This study was done in an exploratory cohort (n=105) and a validation cohort (n=239); within the validation cohort, patients were either taking a 400mg/day d…	Allele C is associated with increased response to imatinib in people with Leukemia, Myelogenous, Chronic, BCR-ABL Positive as compared to allele A.	C			Is	Associated with	increased	response to		in people with	Disease:Chronic myelogenous leukemia, BCR-ABL1 positive		A		0.37	0.82	0.53		0.52	0.37	0.623333	SNP sin predominancia en alguna población	rs2725252-C
1184513485	1184513487	cohort	132		BCR-ABL^IS <=10% at 3 months	Study Cohort					= 0.001	OR				Unknown	rs12505410	ABCG2	imatinib	24123600	Efficacy	yes	As part of a haplotype with rs2725252. Where response was defined as BCR-ABL/ABL standardized ratio (BCR-ABL^IS) of <=10% at 3 months, <=1% at 12 months and <=0.1% at 18 months. Patients were either taking 400mg/day or 600mg/day dose of imatinib. Those with the G-C haplotype (rs12505410-rs2725252) taking a 400mg/day dose had a significantly better response (under all definitions of response), as …	Allele G is associated with increased response to imatinib in people with Leukemia, Myelogenous, Chronic, BCR-ABL Positive as compared to allele T.	G			Is	Associated with	increased	response to		in people with	Disease:Chronic myelogenous leukemia, BCR-ABL1 positive		T		0.5	0.192	0.383		0.342	0.5	0.305667	SNP sin predominancia en alguna población	rs12505410-G
1184513495	1184513497	cohort	132		BCR-ABL^IS <=10% at 3 months	Study Cohort					= 0.001	OR				Unknown	rs2725252	ABCG2	imatinib	24123600	Efficacy	yes	As part of a haplotype with rs12505410. Where response was defined as BCR-ABL/ABL standardized ratio (BCR-ABL^IS) of <=10% at 3 months, <=1% at 12 months and <=0.1% at 18 months. Patients were either taking 400mg/day or 600mg/day dose of imatinib. Those with the G-C haplotype (rs12505410-rs2725252) taking a 400mg/day dose had a significantly better response (under all definitions of response), as…	Allele C is associated with increased response to imatinib in people with Leukemia, Myelogenous, Chronic, BCR-ABL Positive as compared to allele A.	C			Is	Associated with	increased	response to		in people with	Disease:Chronic myelogenous leukemia, BCR-ABL1 positive		A		0.37	0.82	0.53		0.52	0.37	0.623333	SNP sin predominancia en alguna población	rs2725252-C
1184513697	1184513709	cohort	394		GENDEP	Study Cohort					= 0.001	OR				European	rs41271330	BMP5	escitalopram	23926243	Efficacy	yes	12 weeks treatment. Patients were defined as responders if the decrease in both MADRS and Hamilton Depression Rating Scale total scores was at least 50%, and the score on the Clinical Global Impression improvement scale was 2; or less. Five clear responders and five clear non-responders for exome sequencing. Based on the results 38 markers were selected for further genotyping in remaining 116 Est…	Allele A is associated with decreased response to escitalopram in people with Depressive Disorder, Major as compared to allele G.	A			Is	Associated with	decreased	response to		in people with	Disease:Major Depressive Disorder		G		0.5	0.094	0.133		0.1	0.5	0.109	SNP sin predominancia en alguna población	rs41271330-A
1184514504	1184514506	cohort	129		kidney transplantation	Disease	0.767	C			< 0.001	OR				East Asian	rs776746	CYP3A5	tacrolimus	22469198	Dosage, Metabolism/PK	yes	The dose-adjusted trough levels of tacrolimus were nearly 2-fold higher for CYP3A5*3 homozygotes than for CYP3A5*1 homozygotes.	Allele T is associated with increased metabolism of tacrolimus in people with Kidney Transplantation as compared to allele C.	T			Is	Associated with	increased	metabolism of		in people with	Disease:Kidney Transplantation		C		0.85	0.22		0.64	0.25	0.745	0.235	SNP sin predominancia en alguna población	rs776746-T
1184514516	1184514518	cohort	44		kidney transplantation	Disease	0.66	C			= 0.011	OR				Central/South Asian	rs776746	CYP3A5	tacrolimus	21072155	Metabolism/PK	yes	Median L/D ratio for tacrolimus was higher in subjects with CYP3A5*3/*3 than in subjects with CYP3A5*1 carriers at 6th day post-transplantation..	Allele C is associated with decreased metabolism of tacrolimus in people with Kidney Transplantation as compared to allele T.	C			Is	Associated with	decreased	metabolism of		in people with	Disease:Kidney Transplantation		T		0.152	0.777		0.365	0.752	0.2585	0.7645	SNP predominantes en ancestría europea	rs776746-C
1184514519	1184514521	cohort	63		kidney transplantation	Disease	0.746	C			< 0.05	OR				East Asian	rs776746	CYP3A5	tacrolimus	21436775	Metabolism/PK	yes	Dose adjusted blood concentration of tacrolimus was lower in patients carrying CYP3A5*1 allele than patients carrying CYP3A5*3/*3 at the stable stage after kidney transplantation.	Allele C is associated with decreased metabolism of tacrolimus in people with Kidney Transplantation as compared to allele T.	C			Is	Associated with	decreased	metabolism of		in people with	Disease:Kidney Transplantation		T		0.152	0.777		0.365	0.752	0.2585	0.7645	SNP predominantes en ancestría europea	rs776746-C
1184514802	1184514804	cohort	129		kidney transplantation	Disease	0.767	C			< 0.001	OR				East Asian	rs776746	CYP3A5	tacrolimus	22469198	Dosage	yes	After adjusted for sex, body-weight and dose of corticosteroid and mycophenolate mofetil, CYP3A5 genotype has the most profound effects on dose requirement of tacrolimus 1-5 years after transplantation.	Allele T is associated with increased dose of tacrolimus in people with Kidney Transplantation as compared to allele C.	T			Is	Associated with	increased	dose of		in people with	Disease:Kidney Transplantation		C		0.85	0.22		0.64	0.25	0.745	0.235	SNP sin predominancia en alguna población	rs776746-T
1184747986	1184747991	cohort, retrospective	177		>= 60 years old	Age Group	0.57	C			= 0.049	OR	1.894	1.003	3.578	Multiple groups, 81.8% European origin, 5.3% African, 12.9% Asian (in Brazil)	rs6494223	CHRNA7	donepezil, galantamine, rivastigmine	24951635	Efficacy	yes	In patients with mild Alzheimer's disease only (baseline Mini-Mental State Examination (MMSE) score >= 20); in patients with moderate to severe Alzheimer's (MMSE <20) no significant results were seen (p=0.73). Adjusted for gender, age, baseline MMSE, and presence of the APOE E4 allele. After 6 months of treatment with cholinesterase inhibitors, those with the T allele were more likely to be a res…	Allele T is associated with increased response to donepezil, galantamine and rivastigmine in people with Alzheimer Disease as compared to allele C.	T			Is	Associated with	increased	response to	and	in people with	Disease:Alzheimer Disease		C		0.659	0.13	0.388	0.42	0.385	0.5395	0.301	SNP sin predominancia en alguna población	rs6494223-T
1184748906	1184748908	cohort	125		Univariate analysis in a derivation cohort of patients receiving optimal dose of warfarin (INR:2.0-3.5) recruited from a Medical institute in Hyderabad, India.	Study Cohort					< 0.05	OR				Unknown	rs9923231	VKORC1	warfarin	25084205	Dosage	yes	Variant described as -1639G>A (alleles have been complemented to the plus chromosomal strand). This variant was associated with requiring a lower warfarin dose. Linear regression and polynomial regression was used to calculate the contribution of each variable towards therapeutic dose of warfarin, prior to the development of pharmacogenetic algorithms.	Allele T is associated with decreased dose of warfarin.	T			Is	Associated with	decreased	dose of							0.5	0.326	0.42	0.145	0.377	0.3225	0.374333	SNP sin predominancia en alguna población	rs9923231-T
1184748929	1184748931	cohort	125		Univariate analysis in a derivation cohort of patients receiving optimal dose of warfarin (INR:2.0-3.5) recruited from a Medical institute in Hyderabad, India.	Study Cohort					< 0.05	OR				Unknown	rs2108622	CYP4F2	warfarin	25084205	Dosage	yes	Variant described as V433M. This variant was associated with requiring a higher warfarin dose. Alleles have been complemented to the plus chromosomal strand - the T allele represents M. Linear regression and polynomial regression was used to calculate the contribution of each variable towards therapeutic dose of warfarin, prior to the development of pharmacogenetic algorithms.	Allele T is associated with increased dose of warfarin.	T			Is	Associated with	increased	dose of							0.556	0.275	0.282	0.075	0.278	0.3155	0.278333	SNP sin predominancia en alguna población	rs2108622-T
1184754389	1184754402	case/control	127	122	Lung cancer	Disease	0.5	G	0.456	G	= 0.01	OR	2.05	1.19	3.52	East Asian	rs9535826	ATP7B	Platinum compounds	24852429	Efficacy	yes	using a dominant model the authors conclude that the G allele at rs9535826 is associated with increased response ("responders") to platinum therapy.	Allele G is associated with increased response to Platinum compounds in people with Lung Neoplasms as compared to allele T.	G			Is	Associated with	increased	response to		in people with	Disease:Lung Neoplasms		T		0.625	0.417	0.452		0.423	0.625	0.430667	SNP sin predominancia en alguna población	rs9535826-G
1184754406	1184754408	case/control	122	117	Lung cancer;	Disease	0.463	A	0.427	A	= 0.01	OR	1.96	1.17	3.3	East Asian	rs9535828	ATP7B	Platinum compounds	24852429	Efficacy	yes	using a dominant model the authors conclude that the A allele at rs9535828 is associated with increased response ("responders") to platinum therapy.	Allele A is associated with increased response to Platinum compounds in people with Lung Neoplasms as compared to allele G.	A			Is	Associated with	increased	response to		in people with	Disease:Lung Neoplasms		G		0.556	0.239	0.441		0.423	0.556	0.367667	SNP sin predominancia en alguna población	rs9535828-A
1184756122	1184756156	cohort	787		patients undergoing heart valve replacement therapy who had received warfarin therapy for at least 3 months.	Study Cohort	0.083	C	0.917	A	< 0.001	OR				East Asian	rs4917639	CYP2C9	warfarin	25126975	Dosage	yes	Samples, genotypes and INRs from a cohort of 551 patients were used to derive an algorithm which was used to predict daily warfarin maintenance dose in a second cohort of 236 patients. Note: the authors state that "SNPs were tested for deviations from HWE using the chi-squared test, and for their association with the warfarin dose by Spearman correlation analysis using a *co-dominant* model." rs4…	Allele C is associated with decreased dose of warfarin in people with heart valve replacement as compared to allele A.	C			Is	Associated with	decreased	dose of		in people with	Disease:Heart valve replacement		A		0.5	0.091	0.202	0.2	0.194	0.35	0.162333	SNP sin predominancia en alguna población	rs4917639-C
1184756158	1184756160	cohort	787		patients undergoing heart valve replacement therapy who had received warfarin therapy for at least 3 months.	Disease	0.042	C	0.958	A	< 0.001	OR				East Asian	rs1057910	CYP2C9	warfarin	25126975	Dosage	yes	Samples, genotypes and INRs from a cohort of 551 patients were used to derive an algorithm which was used to predict daily warfarin maintenance dose in a second cohort of 236 patients. Note: the authors state that "SNPs were tested for deviations from HWE using the chi-squared test, and for their association with the warfarin dose by Spearman correlation analysis using a *co-dominant* model." rs1…	Allele A is associated with increased dose of warfarin in people with heart valve replacement as compared to allele C.	A			Is	Associated with	increased	dose of		in people with	Disease:Heart valve replacement		C		0.5	0.94	0.94	0.99		0.745	0.94	SNP sin predominancia en alguna población	rs1057910-A
1184756163	1184756165	cohort	787		patients undergoing heart valve replacement therapy who had received warfarin therapy for at least 3 months.	Disease	0.095	T	0.905	C	< 0.001	OR				East Asian	rs7294	VKORC1	warfarin	25126975	Dosage	yes	Samples, genotypes and INRs from a cohort of 551 patients were used to derive an algorithm which was used to predict daily warfarin maintenance dose in a second cohort of 236 patients. Note: the authors state that "SNPs were tested for deviations from HWE using the chi-squared test, and for their association with the warfarin dose by Spearman correlation analysis using a *co-dominant* model." rs7…	Allele T is associated with increased dose of warfarin in people with heart valve replacement as compared to allele C.	T			Is	Associated with	increased	dose of		in people with	Disease:Heart valve replacement		C		0.708	0.328	0.356	0.425	0.347	0.5665	0.343667	SNP sin predominancia en alguna población	rs7294-T
1184756280	1184756283	cohort	787		patients undergoing heart valve replacement therapy who had received warfarin therapy for at least 3 months. This SNP was significant in the multivariate analysis. The B coefficient is 0.163(0.039, 0.288). Partial r-squared is 0.007.	Study Cohort	0.083	C	0.917	C	= 0.010	OR				East Asian	rs2108622	CYP4F2	warfarin	25126975	Dosage	yes	Samples, genotypes and INRs from a cohort of 551 patients were used to derive an algorithm which was used to predict daily warfarin maintenance dose in a second cohort of 236 patients. Note: the authors state that "SNPs were tested for deviations from HWE using the chi-squared test, and for their association with the warfarin dose by Spearman correlation analysis using a *co-dominant* model." rs2…	Allele C is associated with decreased dose of warfarin in people with heart valve replacement as compared to allele T.	C			Is	Associated with	decreased	dose of		in people with	Disease:Heart valve replacement		T		0.44	0.73	0.72	0.93	0.72	0.685	0.723333	SNP sin predominancia en alguna población	rs2108622-C
1184988306	1184988314	cohort	29		Subset of patients receiving efavirenz therapy at 600mg dose per day for 3 or more months.	Study Cohort					= 0.012	OR				Sub-Saharan African	rs3745274	CYP2B6	efavirenz	20952418	Metabolism/PK	yes	Mean log efavirenz trough concentrations increased with the number of T alleles.	Allele T is associated with decreased metabolism of efavirenz in people with HIV Infections.	T			Is	Associated with	decreased	metabolism of		in people with	Disease:HIV infectious disease				0.619	0.33	0.367	0.467	0.354	0.543	0.350333	SNP sin predominancia en alguna población	rs3745274-T
1184988315	1184988317	cohort	29		Subset of patients receiving efavirenz therapy at 600mg dose per day for 3 or more months.	Study Cohort					= 0.001	OR				Sub-Saharan African	rs28399499	CYP2B6	efavirenz	20952418	Metabolism/PK	yes	*Note: combined analysis with rs3745274* Mean log efavirenz trough concentrations increased with the number of rs3745274 T or rs28399499 C alleles.	Allele C is associated with decreased metabolism of efavirenz in people with HIV Infections.	C			Is	Associated with	decreased	metabolism of		in people with	Disease:HIV infectious disease				0.5	0.019	0.011	0.075	0.01	0.2875	0.0133333	SNP sin predominancia en alguna población	rs28399499-C
1184988627	1184988637	cohort	225		Men and women between the ages of 18 and 80 with a primary diagnosis of current alcohol dependence based on DSM-IV-TR criteria who had their last drink 5 or more days before enrollment (Mayo Clinic in Rochester, Minnesota, and various Mayo Clinic Health System sites).	Disease	0.493	A	0.507	T	= 0.024	HR	0.49			European	rs2058878	GRIN2B	acamprosate	25290263	Efficacy	yes	Tag SNPs (518 total) were selected within genes associated with alcoholism as well as genes encoding enzymes involved in glycine metabolism, glycine transporters, subunits of glycine receptors, NMDA receptors, genes involved in glutamate reuptake, synthesis or degradation and genes with reported associations with acamprosate treatment outcomes in human or animal studies. The length of time to fir…	Allele A is associated with increased response to acamprosate in people with Alcoholism as compared to allele T.	A			Is	Associated with	increased	response to		in people with	Disease:Alcohol abuse		T		0.536	0.28	0.436		0.356	0.536	0.357333	SNP sin predominancia en alguna población	rs2058878-A
1184989808	1184989810	cohort	52		CYP3A5*1 carrier	Study Cohort					< 0.0001	OR				European	rs1057868	POR	tacrolimus	25322286	Dosage	yes	NOTE: This association was found for CYP3A5*1 carrier. In the CYP3A5*1 carriers the combination with at least one variant POR*28 T allele (fast metabolizers) was associated with significantly higher tacrolimus dose requirements from day 2 onward compared with POR*28 CC homozygous patients.	Allele T is associated with increased dose of tacrolimus in people with Kidney Transplantation as compared to genotype CC.	T			Is	Associated with	increased	dose of		in people with	Disease:Kidney Transplantation		CC		0.526	0.328	0.346	0.27	0.308	0.398	0.327333	SNP sin predominancia en alguna población	rs1057868-T
1184997409	1184997418	meta-analysis, GWAS	17522		combined	Study Cohort					= 8.52e-29	OR				Multiple groups	rs445925		hmg coa reductase inhibitors	25350695	Efficacy	yes	Carriers of the rs445925 A SNP respond to statins with an additional 4.3% increase per allele in LDL-C lowering effect compared with non-carriers.	Allele A is associated with increased response to hmg coa reductase inhibitors as compared to allele G.	A			Is	Associated with	increased	response to					G		0.577	0.036	0.101	0.24	0.1	0.4085	0.079	SNP sin predominancia en alguna población	rs445925-A
1184997420	1184997424	meta-analysis, GWAS	31056		combined	Study Cohort					= 7.41e-44	OR				Multiple groups	rs10455872	LPA	hmg coa reductase inhibitors	25350695	Efficacy	yes	Carriers of this variant respond to statins with a 5.9% smaller LDL-C lowering per minor allele compared with non-carriers.	Allele G is associated with decreased response to hmg coa reductase inhibitors as compared to allele A.	G			Is	Associated with	decreased	response to					A			0.036	0.059	0	0.037	0	0.044	SNP sin predominancia en alguna población	rs10455872-G
1184997431	1184997435	meta-analysis, GWAS	38599		combined	Study Cohort					= 1.05e-9	OR				Multiple groups	rs646776	CELSR2	hmg coa reductase inhibitors	25350695	Efficacy	yes	Carriers of this SNP respond to statins with an additional 1.5% increase per allele in LDL-C lowering effect compared with non-carriers.	Allele C is associated with increased response to hmg coa reductase inhibitors as compared to allele T.	C			Is	Associated with	increased	response to					T		0.42	0.3	0.23	0.35	0.24	0.385	0.256667	SNP sin predominancia en alguna población	rs646776-C
1184997439	1184997443	meta-analysis, GWAS	24253		combined	Study Cohort					= 1.22e-9	OR				Multiple groups	rs2900478	SLCO1B1	hmg coa reductase inhibitors	25350695	Efficacy	yes	Carriers of this variant respond to statins with a 1.6% smaller LDL-C lowering effect per minor allele compared with non-carriers.	Allele A is associated with decreased response to hmg coa reductase inhibitors as compared to allele T.	A			Is	Associated with	decreased	response to					T		0.5	0.125	0.191		0.192	0.5	0.169333	SNP sin predominancia en alguna población	rs2900478-A
1184997918	1184997920	cohort	201		Ewha–Severance Treatment (EAST) Group	Study Cohort					= 0.051	OR				East Asian	rs3212198	HNF4A	warfarin	25356900	Dosage	yes	Please note this association is found for a combination of two variants. Patients with rs2501873 (TT) and at least one variant allele in HNF4a rs3212198 (T; allele) required higher warfarin doses (6.2±2.4mg) than those with other combinations (5.3± 1.7mg, ranging from 5.2 ±1.9 to 5.5± 1.9mg). These variant combination explained 1.7% of the overall interindividual variability in warfarin dose requ…	Allele T is associated with increased dose of warfarin in people with heart valve replacement as compared to allele C.	T			Is	Associated with	increased	dose of		in people with	Disease:Heart valve replacement		C		0.707	0.292	0.457	0.405	0.47	0.556	0.406333	SNP sin predominancia en alguna población	rs3212198-T
1184998246	1184998248	meta-analysis	2169			Unknown					= 0.018	OR	1.22	1.035	1.445	Multiple groups	rs1954787	GRIK4	antidepressants	25303296	Efficacy	yes	Meta-analysis combining 5 studies.	Allele C is associated with increased response to antidepressants in people with Depressive Disorder, Major as compared to allele T.	C			Is	Associated with	increased	response to		in people with	Disease:Major Depressive Disorder		T		0.5	0.421	0.617	0.23	0.566	0.365	0.534667	SNP sin predominancia en alguna población	rs1954787-C
1184998312	1184998318		291			Unknown	0.73	C			< 0.0001	OR				Latino	rs776746	CYP3A5	tacrolimus	22704849	Dosage	yes	Patients with CYP3A5*1/*1 genotype had a median dose requirement of 0.16mg/kg/day, CYP3A5*1/*3 patients had a median dose requirement of 0.13mg/kg/day, and CYP3A5*3/*3 patients had a median dose requirement of 0.07mg/kg/day.	Allele T is associated with increased dose of tacrolimus in people with Kidney Transplantation as compared to allele C.	T			Is	Associated with	increased	dose of		in people with	Disease:Kidney Transplantation		C		0.85	0.22		0.64	0.25	0.745	0.235	SNP sin predominancia en alguna población	rs776746-T
1184998516	1184998522	cohort	12			Unknown	0.666	C			< 0.027	OR				Unknown	rs776746	CYP3A5	tacrolimus	23364483	Metabolism/PK	yes	The mean dose-adjusted concentration of tacrolimus, dose-adjusted concentration of tacrolimus metabolites (M-I and M-III) and dose-adjusted AUC from time zero to 12 hrs were higher in patients carrying CYP3A5*3/*3 than in patients carrying at least one CYP3A5*1 allele. Multiple regression analysis showed that the presence of CYP3A5*3/*3 genotype was a independent variable determining dose-adjuste…	Allele C is associated with decreased metabolism of tacrolimus in people with Kidney Transplantation as compared to allele T.	C			Is	Associated with	decreased	metabolism of		in people with	Disease:Kidney Transplantation		T		0.152	0.777		0.365	0.752	0.2585	0.7645	SNP predominantes en ancestría europea	rs776746-C
1185002294	1185002299	cohort	113			Unknown	0.43	T			= 0.032	OR				Sub-Saharan African	rs7294	VKORC1	warfarin	21635147	Dosage	yes	in the South African black population. This allele was analyzed along with VKORC1 rs7200749.	Allele T is associated with increased dose of warfarin as compared to allele C.	T			Is	Associated with	increased	dose of					C		0.708	0.328	0.356	0.425	0.347	0.5665	0.343667	SNP sin predominancia en alguna población	rs7294-T
1185002301	1185002303	cohort	113			Unknown	0.26	A			= 0.032	OR				Sub-Saharan African	rs7200749	VKORC1	warfarin	21635147	Dosage	yes	in the South African black population. This allele was analyzed along with VKORC1 rs7294.	Allele A is associated with increased dose of warfarin as compared to allele G.	A			Is	Associated with	increased	dose of					G		0.571	0.031	0.011		0.028	0.571	0.0233333	SNP sin predominancia en alguna población	rs7200749-A
1185234929	1185234931	cohort	263		Anti-retroviral-naive patients with (n=106) or without (n=157) concomittant TB co-infection were treated with efavirenz, zidovuidne and lamivudine. Those also being treated for TB were on a rifampicin-based regimen (2 months of ethambutol, isoniazid and rifampicin followed by 4 months of isoniazid and rifampicin).	Study Cohort					< 0.05	OR				Sub-Saharan African	rs35303484	CYP2B6	efavirenz	25303294	Metabolism/PK	yes	Multivariate analysis of factors influencing efavirenz concentrations over 32 weeks of antiretroviral treatment described CYP2B6*6 (516G>T, rs3745274), CYP2B6*11 (136A>G, rs35303484) and ABCB1 rs3842A>G genotypes were consistent significant predictors of plasma efavirenz concentration (see supplemental Table 1). The study also showed that long-term efavirenz auto-induction was more pronounced in …	Allele G is associated with concentrations of efavirenz in people with HIV Infections as compared to allele A.	G			Is	Associated with		concentrations of		in people with	Disease:HIV infectious disease		A			0.002	0	0		0	0.001	SNP sin predominancia en alguna población	rs35303484-G
1185234940	1185234942	cohort	263		Anti-retroviral-naive patients with (n=106) or without (n=157) concomittant TB co-infection were treated with efavirenz, zidovuidne and lamivudine. Those also being treated for TB were on a rifampicin-based regimen (2 months of ethambutol, isoniazid and rifampicin followed by 4 months of isoniazid and rifampicin).	Study Cohort					< 0.05	OR				Sub-Saharan African	rs3842	ABCB1	efavirenz	25303294	Metabolism/PK	yes	Multivariate analysis of factors influencing efavirenz concentrations over 32 weeks of antiretroviral treatment described CYP2B6*6 (516G>T, rs3745274), CYP2B6*11 (136A>G, rs35303484) and ABCB1 rs3842A>G genotypes were consistent significant predictors of plasma efavirenz concentration (see supplemental Table 1). The study states that the CYP2B6*6, *11 and ABCB1 rs3842A>G genotypes were associated…	Allele C is associated with concentrations of efavirenz in people with HIV Infections as compared to allele T.	C			Is	Associated with		concentrations of		in people with	Disease:HIV infectious disease		T		0.643	0.077	0.133	0.096	0.114	0.3695	0.108	SNP sin predominancia en alguna población	rs3842-C
1296598796	1296598857	cohort	198			Unknown					= 0.02	OR				Multiple groups, mostly White (81%)	rs4253728	PPARA	phenprocoumon	25461249	Dosage	yes	Carriers of the rs4253728A/rs4823613G haplotype were on a higher phenprocoumon dose (17.05 mg) than rs4253728G/rs4823613G haplotype carriers (11.93 mg; P=0.001). PPARA showed a small effect, explaining only 3% of phenprocoumon variability dose. Linear regression analysis for dose prediction controlling for nongenetic factors: PPARA rs4253728 GA+AA beta 0.155 p=0.020	Allele A is associated with increased dose of phenprocoumon as compared to allele G.	A			Is	Associated with	increased	dose of					G		0.5	0.132	0.229	0.065	0.185	0.2825	0.182	SNP sin predominancia en alguna población	rs4253728-A
1296598832	1296598844	GWAS	1426		STAR*D, all ethnicities	Study Cohort					= 3.64E-8	OR	0.76			Multiple groups, non-HIspanic Caucasian, African-American, Hispanic Caucasian	rs520210	NEDD4L	citalopram	23809733	Efficacy	yes	GWAS. Responders to antidepressant treatment had a higher frequency of the A allele as compared to non-responders. Responders were patients that showed a 50% or greater reduction, from baseline to final visit, in the self-report 16-item Quick Inventory of Depressive Symptomatology (QIDS-SR). Participants who did not meet this criteria were non-responders. Patients had to complete at least 6 weeks…	Allele A is associated with increased response to citalopram in people with Depression as compared to allele G.	A			Is	Associated with	increased	response to		in people with	Disease:Depression		G		0.625	0.239	0.303	0.255	0.301	0.44	0.281	SNP sin predominancia en alguna población	rs520210-A
1444666236	1444666238	cohort, prospective	116		116 Brazilian patients who received warfarin therapy for thromboembolism	Study Cohort					< 0.001	OR				European	rs9923231	VKORC1	warfarin	25312789	Dosage	yes	This is using Classification I. It divided the individuals into three dose ranges:; <=21 mg, 21–49 mg, and >= 49 mg/week.	Allele T is associated with decreased dose of warfarin as compared to allele C.	T			Is	Associated with	decreased	dose of					C		0.5	0.326	0.42	0.145	0.377	0.3225	0.374333	SNP sin predominancia en alguna población	rs9923231-T
1444666251	1444666253	cohort, prospective	116		116 Brazilian patients who received warfarin therapy for thromboembolism	Study Cohort					= 0.04	OR	2.22	0.09	5.11	European	rs1045642	ABCB1	warfarin	25312789	Dosage	yes	Classification II divided the individuals into two dose ranges: <70 mg and >=70 mg warfarin/week	Allele A is associated with increased dose of warfarin as compared to allele G.	A			Is	Associated with	increased	dose of					G		0.21	0.45	0.44	0.27		0.24	0.445	SNP sin predominancia en alguna población	rs1045642-A
1444668331	1444668338	cohort	57		healthy individuals	Disease	0.86	G			= 0.03978	OR				Multiple groups	rs784888	SP1	metformin	24853734	Metabolism/PK	yes		Allele G is associated with decreased clearance of metformin in healthy individuals as compared to allele C.	G			Is	Associated with	decreased	clearance of		in healthy individuals			C		0.47	0.96	0.96			0.47	0.96	SNP predominantes en ancestría europea	rs784888-G
1444672903	1444672908	case/control	1105	4831	Rotterdam Study	Study Cohort					< 0.05	OR				Unknown	rs13064411	CFAP44	hmg coa reductase inhibitors	25602530	Efficacy	yes	Carriers of the minor G allele of the rs13064411 polymorphism, associated with statin-induced PCSK9-levels, showed an association with a decreased LDL-lowering and total cholesterol-lowering response to statins compared with AA carriers measured as delta total and LDL cholesterol [total: delta=0.551 mmol/l (AG+GG) vs. delta=0.732 mmol/l (AA), Pinteraction: 5.2×10E-7; LDL: delta=0.566 mmol/l (AG+G…	Allele G is associated with decreased response to hmg coa reductase inhibitors as compared to genotype AA.	G			Is	Associated with	decreased	response to					AA			0.084	0.069	0.011	0.078	0.011	0.077	SNP sin predominancia en alguna población	rs13064411-G
1444697577	1444697585	cohort	275		275 patients with CHD undergoing percutaneous coronary intervention and on antiplatelet clopidogrel therapy. The participants were divided into CR group (n = 59) and non-CR group (NCR, n = 216) based on maximum platelet aggregation measurements.	Study Cohort					< 0.01	OR				East Asian	rs2305948	KDR	clopidogrel	25738571	Efficacy	yes	Genotype and allele frequency of VEGFR-2 rs2305948 was significantly; higher in the CR (clopidogrel resistant) group than in the NCR group (TT: 55.9% vs. 36.1%, P<0.05; T allele: 78.5% vs. 66.8%,P<0.01, respectively).	Allele T is associated with decreased response to clopidogrel in people with Coronary Disease as compared to allele C.	T			Is	Associated with	decreased	response to		in people with	Disease:Coronary Disease		C		0.571	0.089	0.149	0.22	0.122	0.3955	0.12	SNP sin predominancia en alguna población	rs2305948-T
1444698851	1444698861	cohort	134		postpartum women with HIV	Study Cohort					= 2e-10	OR				Unknown	rs3745274	CYP2B6	efavirenz	25669165	Metabolism/PK	yes	in both pregnant and postpartum women. Efavirenz exposure was significantly reduced during pregnancy as compared to postpartum, especially in patients with the GG genotype.	Allele T is associated with decreased clearance of efavirenz in people with HIV Infections as compared to allele G.	T			Is	Associated with	decreased	clearance of		in people with	Disease:HIV infectious disease		G		0.619	0.33	0.367	0.467	0.354	0.543	0.350333	SNP sin predominancia en alguna población	rs3745274-T
1444699595	1444699600	cohort	217		acenocoumarol for at least 3 months with INR of 2-3.5; digoxin, furosemide, penicillin and verapamil (co-prescribed); T allele multiple linear regression analysis (B=-0.239; SE=0.030; adj R sq.=0.286)	Drug	0.127	T	0.873	C	= 0.000	OR				Central/South Asian	rs9923231	VKORC1	acenocoumarol	25519826	Dosage	yes	The mean daily dose of individuals with the genotypes CC (N=166), CT (N=47), and TT (N=4) were 4.3 (+/-2.3) mg, 1.8 (+/- 0.6) mg, and 1.3 (+/-0.5) mg. In univariate and multivariate analysis the T allele remained significantly associated with variability in acenocoumarol dose. Please note the alleles have been reported on the + chromosomal strand. The authors report the A allele as being associat…	Allele T is associated with decreased dose of acenocoumarol as compared to allele C.	T			Is	Associated with	decreased	dose of					C		0.5	0.326	0.42	0.145	0.377	0.3225	0.374333	SNP sin predominancia en alguna población	rs9923231-T
1444699605	1444699607	cohort	217		acenocoumarol for at least 3 months with INR of 2-3.5; digoxin, furosemide, penicillin and verapamil (co-prescribed); T allele multiple linear regression analysis (B=0.043; SE=0.014; adj R sq.=0.598)	Drug	0.373	T	0.627	C	= 0.037	OR				Central/South Asian	rs2108622	CYP4F2	acenocoumarol	25519826	Dosage	yes	The mean daily dose of individuals with the genotypes CC (N=92), CT (N=88), and TT (N=37) were 3.3 (+/-2.0) mg, 3.1 (+/- 1.6) mg, and 5.3 (+/-3.0) mg. In univariate and multivariate analysis the T allele remained significantly associated with variability in acenocoumarol dose. Please note the alleles have been reported on the + chromosomal strand. The authors report the A allele as being associat…	Allele T is associated with increased dose of acenocoumarol as compared to allele C.	T			Is	Associated with	increased	dose of					C		0.556	0.275	0.282	0.075	0.278	0.3155	0.278333	SNP sin predominancia en alguna población	rs2108622-T
1444699618	1444699620	cohort	217		acenocoumarol for at least 3 months with INR of 2-3.5; digoxin, furosemide, penicillin and verapamil (co-prescribed); T allele multiple linear regression analysis (B=0.057; SE=0.025; adj R sq.=0.615)	Drug	0.765	T	0.235	C	= 0.027	OR				Central/South Asian	rs7294	VKORC1	acenocoumarol	25519826	Dosage	yes	The mean daily dose of individuals with the genotypes CC (N=7), CT (N=88), and TT (N=122) were 1.5 (+/-1.0) mg, 2.4 (+/- 1.5) mg, and 4.7 (+/-2.2) mg. In univariate and multivariate analysis the T allele remained significantly associated with variability in acenocoumarol dose. Please note the alleles have been reported on the + chromosomal strand. The authors report the A allele as being associat…	Allele T is associated with increased dose of acenocoumarol as compared to allele C.	T			Is	Associated with	increased	dose of					C		0.708	0.328	0.356	0.425	0.347	0.5665	0.343667	SNP sin predominancia en alguna población	rs7294-T
1444702631	1444702641	case/control	119	89	EULAR good response vs. non-response at six months, 208 patients	Study Cohort	0.35	G			= 0.019	OR	0.58	0.37	0.91	European	rs3761847	TRAF1	Tumor necrosis factor alpha (TNF-alpha) inhibitors	25834819	Efficacy	yes	using either the absolute change in DAS28 or the proportion of good responders and non-responders as outcomes. The G allele is also a susceptibility factor for RA related to TNF signaling.	Allele G is associated with decreased response to Tumor necrosis factor alpha (TNF-alpha) inhibitors in people with Arthritis, Rheumatoid as compared to allele A.	G			Is	Associated with	decreased	response to		in people with	Disease:Rheumatoid arthritis		A		0.39	0.55	0.36	0.61	0.4	0.5	0.436667	SNP sin predominancia en alguna población	rs3761847-G
1444703466	1444703472	GWAS	1492		Kaiser Permanente Genetic Epidemiology Research on Adult Health and Aging (GERA)	Study Cohort					= 2.0E-8	OR				European	rs2231142	ABCG2	allopurinol	25676789	Efficacy	yes	The authors designated "response to allopurinol" as a reduction of serum uric acid levels to below 6 mg/dL. Mean age was 68 years, 75% were male. The elevated mean baseline SUA before treatment was 8.9 mg/dL. No other SNPs reached genome wide significance.	Allele T is associated with decreased response to allopurinol in people with Gout as compared to allele G.	T			Is	Associated with	decreased	response to		in people with	Disease:Gout		G		0.5	0.119	0.133	0.045	0.136	0.2725	0.129333	SNP sin predominancia en alguna población	rs2231142-T
1444704274	1444704284	cohort	471		good plus moderate vs non responders (includes patients from analysis good vs non responders)	Study Cohort					= 0.018	OR	1.55	1.08	2.22	European	rs3397	TNFRSF1B	Tumor necrosis factor alpha (TNF-alpha) inhibitors	25850964	Efficacy	yes	Treatments included Methotrexate, Leflunomide, Sulfasalazine, Infliximab, Etanercept, Adalimumab, Abatacept, Rituximab, Tocilimumab, and others.	Allele C is associated with decreased response to Tumor necrosis factor alpha (TNF-alpha) inhibitors in people with Arthritis, Rheumatoid as compared to allele T.	C			Is	Associated with	decreased	response to		in people with	Disease:Rheumatoid arthritis		T		0.4	0.34	0.32			0.4	0.33	SNP sin predominancia en alguna población	rs3397-C
1444705565	1444705567	cohort	111			Unknown					= 0.014	OR				Central/South Asian	rs9923231	VKORC1	acenocoumarol	23481074	Dosage	yes	The CYP2C9*2, *3 and VKORC1 rs9923231 are analyzed together. Patients carrying any of the variant alleles was 34% among those receiving a low dose of =20 mg/wk while it was 13.8 per cent in those receiving >20 mg/wk (P=0.014).	Allele T is associated with decreased dose of acenocoumarol as compared to allele C.	T			Is	Associated with	decreased	dose of					C		0.5	0.326	0.42	0.145	0.377	0.3225	0.374333	SNP sin predominancia en alguna población	rs9923231-T
1444705578	1444705584	GWAS	293		GWAS discovery	Study Cohort					= 7.06E-8	OR	1.98	1.57	2.52	Multiple groups	rs8099917	IFNL3	peginterferon alfa-2b, ribavirin	19749758	Efficacy	yes	This genotype reached genome-wide significance and is associated with sustained virological response (SVR). SVR is defined as negative OCR test for Hepatitis C 6 months after the cessation of therapy. The authors do not indicate polarity of the association. However, decreased polarity can be inferred from Table 2 in the paper.	Allele G is associated with decreased response to peginterferon alfa-2b and ribavirin in people with Hepatitis C, Chronic as compared to allele T.	G			Is	Associated with	decreased	response to	and	in people with	Disease:Chronic hepatitis C virus infection		T		0.5	0.167	0.271	0.09	0.323	0.295	0.253667	SNP sin predominancia en alguna población	rs8099917-G
1444705641	1444705643	GWAS	555		HCV genotype 1 patients	Disease					= 3.98E-5	OR	1.54	1.25	1.9	Multiple groups	rs6806020		peginterferon alfa-2b, ribavirin	19749758	Efficacy	yes	The significance of this association did not reach genome-wide significance. This genotype is associated with sustained virological response (SVR). SVR is defined as negative OCR test for Hepatitis C 6 months after the cessation of therapy. The authors do not indicate polarity of the association. However, decreased polarity can be inferred from Table 2 in the paper.	Allele C is associated with decreased response to peginterferon alfa-2b and ribavirin in people with Hepatitis C, Chronic as compared to allele T.	C			Is	Associated with	decreased	response to	and	in people with	Disease:Chronic hepatitis C virus infection		T		0.838	0.767	0.787	0.825	0.794	0.8315	0.782667	SNP sin predominancia en alguna población	rs6806020-C
1444705648	1444705650	GWAS	555		HCV genotype 1 patients	Disease					= 8.62E-5	OR	1.54	1.24	1.92	Multiple groups	rs1931704		peginterferon alfa-2b, ribavirin	19749758	Efficacy	yes	The significance of this association did not reach genome-wide significance. This genotype is associated with sustained virological response (SVR). SVR is defined as negative OCR test for Hepatitis C 6 months after the cessation of therapy. The authors do not indicate polarity of the association. However, decreased polarity can be inferred from Table 2 in the paper.	Allele A is associated with decreased response to peginterferon alfa-2b and ribavirin in people with Hepatitis C, Chronic as compared to allele G.	A			Is	Associated with	decreased	response to	and	in people with	Disease:Chronic hepatitis C virus infection		G		0.58	0.221	0.202	0.305	0.254	0.4425	0.225667	SNP sin predominancia en alguna población	rs1931704-A
1444705654	1444705656	GWAS	555		HCV genotype 1 patients	Disease					= 8.91E-5	OR	2.09	1.44	3.05	Multiple groups	rs7750468		peginterferon alfa-2b, ribavirin	19749758	Efficacy	yes	The significance of this association did not reach genome-wide significance. This genotype is associated with sustained virological response (SVR). SVR is defined as negative OCR test for Hepatitis C 6 months after the cessation of therapy. The authors do not indicate polarity of the association. However, decreased polarity can be inferred from Table 2 in the paper.	Allele G is associated with decreased response to peginterferon alfa-2b and ribavirin in people with Hepatitis C, Chronic as compared to allele A.	G			Is	Associated with	decreased	response to	and	in people with	Disease:Chronic hepatitis C virus infection		A		0.45	0.95	0.94	0.96	0.96	0.705	0.95	SNP sin predominancia en alguna población	rs7750468-G
1444705660	1444705663	GWAS	555		HCV genotype 1 patients	Disease					= 1.53E-4	OR	1.68	1.28	2.2	Multiple groups	rs1503391	CARD16	peginterferon alfa-2b, ribavirin	19749758	Efficacy	yes	The significance of this association did not reach genome-wide significance. This genotype is associated with sustained virological response (SVR). SVR is defined as negative OCR test for Hepatitis C 6 months after the cessation of therapy. The authors do not indicate polarity of the association. However, decreased polarity can be inferred from Table 2 in the paper.	Allele A is associated with decreased response to peginterferon alfa-2b and ribavirin in people with Hepatitis C, Chronic as compared to allele C.	A			Is	Associated with	decreased	response to	and	in people with	Disease:Chronic hepatitis C virus infection		C		0.41	0.72	0.75	0.83	0.73	0.62	0.733333	SNP sin predominancia en alguna población	rs1503391-A
1444705668	1444705670	GWAS	555		HCV genotype 1 patients	Disease					= 2.58E-4	OR	1.52	1.21	1.91	Multiple groups	rs2066911		peginterferon alfa-2b, ribavirin	19749758	Efficacy	yes	The significance of this association did not reach genome-wide significance. This genotype is associated with sustained virological response (SVR). SVR is defined as negative OCR test for Hepatitis C 6 months after the cessation of therapy. The authors do not indicate polarity of the association. However, decreased polarity can be inferred from Table 2 in the paper.	Allele A is associated with decreased response to peginterferon alfa-2b and ribavirin in people with Hepatitis C, Chronic as compared to allele G.	A			Is	Associated with	decreased	response to	and	in people with	Disease:Chronic hepatitis C virus infection		G		0.567	0.06	0.181	0.2	0.166	0.3835	0.135667	SNP sin predominancia en alguna población	rs2066911-A
1444705674	1444705677	GWAS	555		HCV genotype 1 patients	Disease					= 2.87E-4	OR	1.64	1.25	2.15	Multiple groups	rs557905	CASP1	peginterferon alfa-2b, ribavirin	19749758	Efficacy	yes	The significance of this association did not reach genome-wide significance. This genotype is associated with sustained virological response (SVR). SVR is defined as negative OCR test for Hepatitis C 6 months after the cessation of therapy. The authors do not indicate polarity of the association. However, decreased polarity can be inferred from Table 2 in the paper.	Allele T is associated with decreased response to peginterferon alfa-2b and ribavirin in people with Hepatitis C, Chronic as compared to allele C.	T			Is	Associated with	decreased	response to	and	in people with	Disease:Chronic hepatitis C virus infection		C		0.41	0.78	0.77	0.91		0.66	0.775	SNP sin predominancia en alguna población	rs557905-T
1444705683	1444705685	GWAS	555		HCV genotype 1 patients	Disease					= 4.30E-4	OR	1.61	1.23	2.11	Multiple groups	rs568910	CASP1	peginterferon alfa-2b, ribavirin	19749758	Efficacy	yes	The significance of this association did not reach genome-wide significance. This genotype is associated with sustained virological response (SVR). SVR is defined as negative OCR test for Hepatitis C 6 months after the cessation of therapy. The authors do not indicate polarity of the association. However, decreased polarity can be inferred from Table 2 in the paper.	Allele A is associated with decreased response to peginterferon alfa-2b and ribavirin in people with Hepatitis C, Chronic as compared to allele C.	A			Is	Associated with	decreased	response to	and	in people with	Disease:Chronic hepatitis C virus infection		C		0.41	0.85	0.76	0.83	0.73	0.62	0.78	SNP sin predominancia en alguna población	rs568910-A
1444705691	1444705694	GWAS	555		HCV genotype 1 patients	Disease					= 4.47E-4	OR	1.49	1.19	1.87	Multiple groups	rs3093390	IL21R	peginterferon alfa-2b, ribavirin	19749758	Efficacy	yes	The significance of this association did not reach genome-wide significance. This genotype is associated with sustained virological response (SVR). SVR is defined as negative OCR test for Hepatitis C 6 months after the cessation of therapy. The authors do not indicate polarity of the association. However, decreased polarity can be inferred from Table 2 in the paper.	Allele C is associated with decreased response to peginterferon alfa-2b and ribavirin in people with Hepatitis C, Chronic as compared to allele T.	C			Is	Associated with	decreased	response to	and	in people with	Disease:Chronic hepatitis C virus infection		T		0.45	0.79	0.72	0.65	0.7	0.55	0.736667	SNP sin predominancia en alguna población	rs3093390-C
1444705702	1444705704	GWAS	555		HCV genotype 1 patients	Disease					= 5.34E-4	OR	1.81	1.29	2.55	Multiple groups	rs7512595		peginterferon alfa-2b, ribavirin	19749758	Efficacy	yes	The significance of this association did not reach genome-wide significance. This genotype is associated with sustained virological response (SVR). SVR is defined as negative OCR test for Hepatitis C 6 months after the cessation of therapy. The authors do not indicate polarity of the association. However, decreased polarity can be inferred from Table 2 in the paper.	Allele A is associated with decreased response to peginterferon alfa-2b and ribavirin in people with Hepatitis C, Chronic as compared to allele G.	A			Is	Associated with	decreased	response to	and	in people with	Disease:Chronic hepatitis C virus infection		G		0.31	0.88	0.94	0.66		0.485	0.91	SNP predominantes en ancestría europea	rs7512595-A
1444705709	1444705711	GWAS	555		HCV genotype 1 patients	Disease					= 6.71E-4	OR	1.74	1.26	2.41	Multiple groups	rs1792774	CARD16	peginterferon alfa-2b, ribavirin	19749758	Efficacy	yes	The significance of this association did not reach genome-wide significance. This genotype is associated with sustained virological response (SVR). SVR is defined as negative OCR test for Hepatitis C 6 months after the cessation of therapy. The authors do not indicate polarity of the association. However, decreased polarity can be inferred from Table 2 in the paper.	Allele C is associated with decreased response to peginterferon alfa-2b and ribavirin in people with Hepatitis C, Chronic as compared to allele T.	C			Is	Associated with	decreased	response to	and	in people with	Disease:Chronic hepatitis C virus infection		T		0.5	0.8	0.8	0.95	0.79	0.725	0.796667	SNP sin predominancia en alguna población	rs1792774-C
1444705718	1444705721	GWAS	555		HCV genotype 1 patients	Disease					= 9.47E-4	OR	1.53	1.19	1.97	Multiple groups	rs17461620	TUT7	peginterferon alfa-2b, ribavirin	19749758	Efficacy	yes	The significance of this association did not reach genome-wide significance. This genotype is associated with sustained virological response (SVR). SVR is defined as negative OCR test for Hepatitis C 6 months after the cessation of therapy. The authors do not indicate polarity of the association. However, decreased polarity can be inferred from Table 2 in the paper.	Allele C is associated with decreased response to peginterferon alfa-2b and ribavirin in people with Hepatitis C, Chronic as compared to allele T.	C			Is	Associated with	decreased	response to	and	in people with	Disease:Chronic hepatitis C virus infection		T		0.5	0.91	0.73	0.94	0.83	0.72	0.823333	SNP sin predominancia en alguna población	rs17461620-C
1444706626	1444706632	cohort	237			Unknown	0.67	T			< 0.001	OR	8.724	4.031	18.88	European	rs12979860	IFNL3, IFNL4	peginterferon alfa-2b, ribavirin	24073221	Efficacy	yes	This genotype is associated with sustained virological response (SVR).	Allele T is associated with decreased response to peginterferon alfa-2b and ribavirin in people with Hepatitis C, Chronic as compared to allele C.	T			Is	Associated with	decreased	response to	and	in people with	Disease:Chronic hepatitis C virus infection		C		0.778	0.427	0.415		0.476	0.778	0.439333	SNP predominantes en ancestría africana	rs12979860-T
1444706633	1444706635	cohort	237			Unknown					= 0.021	OR	0.438	0.204	0.882	European	rs2228570	VDR	peginterferon alfa-2b, ribavirin	24073221	Efficacy	yes	This genotype is associated with sustained virological response (SVR).	Allele A is associated with increased response to peginterferon alfa-2b and ribavirin in people with Hepatitis C, Chronic as compared to allele G.	A			Is	Associated with	increased	response to	and	in people with	Disease:Chronic hepatitis C virus infection		G		0.18	0.43	0.41	0.22		0.2	0.42	SNP sin predominancia en alguna población	rs2228570-A
1444706755	1444706761	GWAS	522		HCV genotype 1b	Disease					= 0.032	OR	1.4	0.93	2.09	East Asian	rs1127354	ITPA	peginterferon alfa-2b, ribavirin	20637204	Efficacy	yes	This genotype is associated with sustained virological response (SVR). This association was not statistically significant by multivariate analysis (P=0.1).	Allele A is associated with increased response to peginterferon alfa-2b and ribavirin in people with Hepatitis C as compared to allele C.	A			Is	Associated with	increased	response to	and	in people with	Disease:Hepatitis C virus infection		C		0.5	0.027	0.027	0.03		0.265	0.027	SNP sin predominancia en alguna población	rs1127354-A
1444706925	1444706927	cohort, GWAS	1451			Unknown					= 2e-123	Unknown				European	rs10871454	STX4	acenocoumarol	19578179	Dosage	yes	from a GWAS study consisting of the index population of 1451 Caucasian subjects from the Rotterdam study and results were replicated in 287 subjects from the Rotterdam study extended cohort. Results were reported as dosage change of -5.2mg/week per additional variant allele but allele was not specified, assumed T based on MAF from dbSNP. The SNP rs10871454 was in; complete LD in our RS-I cohort w…	Allele T is associated with decreased dose of acenocoumarol as compared to allele C.	T			Is	Associated with	decreased	dose of					C		0.5	0.346	0.415	0.145	0.379	0.3225	0.38	SNP sin predominancia en alguna población	rs10871454-T
1444706936	1444706938	cohort, GWAS	1451			Unknown					= 2e-8	Unknown				European	rs2108622	CYP4F2	acenocoumarol	19578179	Dosage	yes	from a GWAS study.	Allele T is associated with increased dose of acenocoumarol as compared to allele C.	T			Is	Associated with	increased	dose of					C		0.556	0.275	0.282	0.075	0.278	0.3155	0.278333	SNP sin predominancia en alguna población	rs2108622-T
1444842712	1444842722	meta-analysis	1182		tacrolimus dose 6 months post-transplantation	Drug					< 0.001	OR				Multiple groups	rs2740574	CYP3A4	tacrolimus	26039043	Dosage	yes	The C allele (CYP3A4 *1B) was associated with a higher dose of tacrolimus at 7 days ((weight mean difference) WMD (-0.048); 95% CI: (-0.083_ -0.014), 6 months (WMD -0.058); 95% CI (-0.081_ -0.036), and 1 year (WMD -0.096_-0.027) post-transplantation.	Allele C is associated with increased dose of tacrolimus in people with Kidney Transplantation as compared to allele T.	C			Is	Associated with	increased	dose of		in people with	Disease:Kidney Transplantation		T		0.4	0.24	0.1	0.57	0.13	0.485	0.156667	SNP sin predominancia en alguna población	rs2740574-C
1444842728	1444842884	meta-analysis	1182		tacrolimus C0/Dose ratio at 6 months post-transplantation	Drug					= 0.001	OR				Multiple groups	rs2740574	CYP3A4	tacrolimus	26039043	Metabolism/PK	yes	Trough concentration/weight-adjusted tacrolimus daily dose ratio (C0/Dose ratio) was significantly higher in rs 2740574 TT genotype (CYP3A4*1/*1) compared to CT and CC genotypes (CYP3A4*1B carriers) at 6 months (WMD 52.588; 95% CI 22.387 ~ 82.789) and 12 months (WMD 62.219; 95% CI 14.218 ~ 110.221) post-transplantation.	Allele C is associated with decreased dose-adjusted trough concentrations of tacrolimus in people with Kidney Transplantation as compared to allele T.	C			Is	Associated with	decreased	dose-adjusted trough concentrations of		in people with	Disease:Kidney Transplantation		T		0.4	0.24	0.1	0.57	0.13	0.485	0.156667	SNP sin predominancia en alguna población	rs2740574-C
1444929377	1444929401	cohort	281			Unknown					= 0.0075	OR				European	rs2069705	IFNG	Tumor necrosis factor alpha (TNF-alpha) inhibitors	26111149	Efficacy	yes		Allele G is associated with increased response to Tumor necrosis factor alpha (TNF-alpha) inhibitors in people with Arthritis, Rheumatoid as compared to allele A.	G			Is	Associated with	increased	response to		in people with	Disease:Rheumatoid arthritis		A		0.36	0.62	0.47	0.43	0.52	0.395	0.536667	SNP sin predominancia en alguna población	rs2069705-G
1444930282	1444930288	cohort	1026		the authors reported an association between the A allele (per allele effect = 23.9 ng/mL) and level of contine in the blood of smokers.	Study Cohort	0.393	A	0.607	G	< 0.0001	OR		14.4	33.4	European	rs16969968	CHRNA5	nicotine	26010901	Dosage	yes	The A allele of rs16969968 was significantly associated with 10% higher cotinine levels, however it was not significantly with self-reported number of cigarettes per day (P = 0.30). Smokers carrying an ‘A’ allele of rs16969968 had significantly higher cotinine per cigarette (P = 0.002).	Allele A is associated with increased dose of nicotine in people with Tobacco Use Disorder as compared to allele G.	A			Is	Associated with	increased	dose of		in people with	Disease:Tobacco Use Disorder		G			0.239	0.346	0.05	0.239	0.05	0.274667	SNP sin predominancia en alguna población	rs16969968-A
1444932172	1444932181	cohort	57		healthy volunteers administered metformin	Study Cohort					< 0.05	OR				Unknown	rs2076828	SLC22A3	metformin	25920679	Efficacy	yes	A healthy human cohort that was used to determine the effects of functional variants, including rs2076828, on metformin disposition and response. Carriers of the G allele had significantly smaller changes in their glucose AUC (mean ± S.D.; CC, -88 ± 40 mg/dl per hour; CG, -34 ± 51 mg/dl per hour; GG, -41 ± 72 mg/dl per hour) and significantly lower glucose AUC even before metformin dosing (mean ±…	Allele G is associated with decreased response to metformin in healthy individuals as compared to allele C.	G			Is	Associated with	decreased	response to		in healthy individuals			C		0.556	0.087	0.33		0.33	0.556	0.249	SNP sin predominancia en alguna población	rs2076828-G
1445296586	1445296604	meta-analysis	379			Unknown					= 0.031	OR	1.42	1.03	1.96	Multiple groups, Asian, American, African, European	rs2032582	ABCB1	imatinib	25245580	Efficacy	yes	Meta-analysis with 5 studies. The odds of a C allele carrier were lower in responders vs. non-responders to treatment, as compared to those who carried the A or T allele. Please note that the rs2032582 genotypes present in this cohort were not provided. Additionally, significant results were only found when considering non-uniform response criteria - i.e. using cytogenetic response (CR), complete…	Allele C is associated with decreased response to imatinib in people with Leukemia, Myelogenous, Chronic, BCR-ABL Positive.	C			Is	Associated with	decreased	response to		in people with	Disease:Chronic myelogenous leukemia, BCR-ABL1 positive						0.537				0.537	SNP sin predominancia en alguna población	rs2032582-C
1446533819	1446534310	cohort, GWAS	367		low dose group 180 patients, high dose group 187 patients	Study Cohort					= 1.08e-33	OR	20.4	14.3	29	Multiple groups, Brazilian	rs749671	VKORC1	warfarin	26265036	Dosage	yes	The G allele was strongly associated with high warfarin dose (G allele, OR: 20.4 [14.3–29.0]; p = 1.08 × 10-33) in Brazilian patients.	Allele G is associated with increased dose of warfarin as compared to allele A.	G			Is	Associated with	increased	dose of					A		0.5	0.59	0.59		0.63	0.5	0.603333	SNP sin predominancia en alguna población	rs749671-G
1446534354	1446534356	cohort, GWAS	367		low dose group 180 patients, high dose group 187 patients	Study Cohort					= 4.4e-13	OR	6.8	5	9.1	Multiple groups, Brazilian	rs9332238	CYP2C9	warfarin	26265036	Dosage	yes	The G allele was strongly associated with high warfarin dose (G allele, OR: 6.8 [5.0–9.1]; p = 4.4 × 10-13) in Brazilian patients. This variant is in virtually perfect LD with CYP2C9*2 (rs1799853) and CYP2C9*3 (rs1057910).	Allele G is associated with increased dose of warfarin as compared to allele A.	G			Is	Associated with	increased	dose of					A		0.5	0.85	0.81	0.95	0.84	0.725	0.833333	SNP sin predominancia en alguna población	rs9332238-G
1446896983	1446896994	clinical trial	646		Cholesterol and Pharmacogenetics (CAP); allele frequencies are for African-American and Caucasian patients combined although there were no AA patients with the CC genotype	Study Cohort	0.12	C	0.88	T	< 0.001	OR				Multiple groups	rs4149056	SLCO1B1	simvastatin, simvastatin acid	26164721	Metabolism/PK	yes	Patients were followed for 6 weeks (40 mg simvastatin at bedtime) and seen at the clinic at 2 week intervals. Patients with the CT and CC genotypes had 71% and 248% higher plasma simvastatin acid at 12 hours, respectively, as compared to those with the TT genotypes.; In a separate analysis, the authors combined patients into groups based on their expected simvastatin acid/ simvastatin ratios (SVA…	Allele C is associated with increased concentrations of simvastatin and simvastatin acid in people with Hypercholesterolemia as compared to allele T.	C			Is	Associated with	increased	concentrations of	and	in people with	Disease:Hypercholesterolemia		T		0.5	0.188	0.181	0.045	0.192	0.2725	0.187	SNP sin predominancia en alguna población	rs4149056-C
1446897318	1446897333	meta-analysis, GWAS	558		current study, RIPRAC, NHANES	Study Cohort					< 8.8E-4	OR				Multiple groups	rs34548976		adrenergics, inhalants	25918834	Efficacy	yes	For the discovery cohort, 351 children (ages 6–14 yr) with asthma (defined as physician-diagnosed asthma and =1 episode of wheeze in the previous yr) were recruited from households in San Juan (Puerto Rico). Replication of our findings for stress and BDR was attempted in 471 children with asthma (ages 7–15 yr) living in Rhode Island (n=229; 59 PR, 81 Dominican, and 89 non-Hispanic white children)…	Allele T is associated with decreased response to adrenergics, inhalants in children with Asthma as compared to allele C.	T	Pediatric		Is	Associated with	decreased	response to		in children with	Disease:Asthma		C		0.733	0.257	0.324		0.316	0.733	0.299	SNP sin predominancia en alguna población	rs34548976-T
1446900777	1446900783	cohort, prospective	37		advanced NSCLC multicenter study in Netherlands	Study Cohort	0.243	C			< 0.00001	OR				Unknown	rs2072671	CDA	gemcitabine	21590444	Metabolism/PK	yes	However, this was not associated with toxicity.	Allele C is associated with decreased clearance of gemcitabine in people with Carcinoma, Non-Small-Cell Lung as compared to allele A.	C			Is	Associated with	decreased	clearance of		in people with	Disease:Non-Small Cell Lung Carcinoma		A		0.5	0.269	0.271	0.12	0.284	0.31	0.274667	SNP sin predominancia en alguna población	rs2072671-C
1446902880	1446902896	cohort, meta-analysis	1344		INVEST-GENES, all patients	Study Cohort					= 3.2e-5	OR	1.5	1.24	1.81	Multiple groups, USA	rs4742610	PTPRD	trandolapril, verapamil	26425837	Efficacy	yes	This was associated with resistant hypertension in whites and Hispanics in the international verapamil SR trandolapril study (meta-analysis P=3.2×10-5).	Allele T is associated with resistance to trandolapril and verapamil in people with Hypertension as compared to allele C.	T			Is	Associated with		resistance to	and	in people with	Disease:Hypertension		C			0.296	0.511	0.275	0.478	0.275	0.428333	SNP sin predominancia en alguna población	rs4742610-T
1446903336	1446903386	meta-analysis	970		FinnTwin pooled, Young Finns, FINRISK2007; minor allele beta= -0.65	Study Cohort					= 5.77E-86	OR				European	rs56113850	CYP2A6	nicotine	26407342	Metabolism/PK	yes	The minor allele was independently associated with decreased NMR, indicating decreased rate of nicotine clearance. rs56113850 and rs12461964 were in LD with CYP2A6*2, and esv2663194 (not annotated) was in LD with CYP2A6*9. rs56113850, rs12461964, and esv2663194 emerged as signals independently associated with NMR in GWAS and in conditional analyses. A fourth signal, rs113288603, was not significa…	Allele T is associated with decreased clearance of nicotine as compared to allele C.	T			Is	Associated with	decreased	clearance of					C		0.26	0.39	0.38		0.38	0.26	0.383333	SNP sin predominancia en alguna población	rs56113850-T
1446903387	1446903415	meta-analysis, GWAS			FinnTwin pooled, Young Finns, FINRISK2007; analyses conditioned on the top SNP (rs56113850) revealed rs113288603 to be sig associated with NMR	Study Cohort					= 7.03E-25	OR				European	rs113288603		nicotine	26407342	Metabolism/PK	yes	The minor allele was independently associated with decreased NMR, indicating decreased rate of nicotine clearance. rs56113850 and rs12461964 were in LD with CYP2A6*2, and esv2663194 (not annotated) was in LD with CYP2A6*9. rs56113850, rs12461964, and esv2663194 emerged as signals independently associated with NMR in GWAS and in conditional analyses. A fourth signal, rs113288603, was not significa…	Allele T is associated with decreased clearance of nicotine as compared to allele C.	T			Is	Associated with	decreased	clearance of					C				0.016				0.016	SNP sin predominancia en alguna población	rs113288603-T
1446903395	1446903400	meta-analysis	970		FinnTwin pooled, Young Finns, FINRISK2007; minor allele beta= -0.61	Study Cohort					= 3.66E-76	OR				European	rs12461964		nicotine	26407342	Metabolism/PK	yes	The minor allele was independently associated with decreased NMR, indicating decreased rate of nicotine clearance. rs56113850 and rs12461964 were in LD with CYP2A6*2, and esv2663194 (not annotated) was in LD with CYP2A6*9. rs56113850, rs12461964, and esv2663194 emerged as signals independently associated with NMR in GWAS and in conditional analyses. A fourth signal, rs113288603, was not significa…	Allele A is associated with decreased clearance of nicotine as compared to allele G.	A			Is	Associated with	decreased	clearance of					G		0.5	0.68	0.5			0.5	0.59	SNP sin predominancia en alguna población	rs12461964-A
1446903431	1446903439	cohort	258		Mayo Genome Consortia; beta -0.7885, 95% CI (-1.28; -0.297)	Study Cohort	0.0311	A			= 0.00188	OR				Unknown	rs7541245	FMO5	metformin	26306225	Efficacy	yes	EHR-linked and EHR-based phenotyping methods were used to study common variants within FMO5. Efficacy was assessed by A1c levels extracted from EHR records.	Allele A is associated with decreased response to metformin in people with Diabetes Mellitus as compared to allele C.	A			Is	Associated with	decreased	response to		in people with	Disease:Diabetes Mellitus		C		0.5		0.032	0.075	0.039	0.2875	0.0355	SNP sin predominancia en alguna población	rs7541245-A
1446905073	1446905078	cohort	70			Unknown	0.686	C			= 0.044	OR	2.73	1.01	7.4	East Asian	rs1295686	IL13	Hepatitis vaccines	21111021	Efficacy	yes	The T allele increased the risk of non-immune response to hepatitis B vaccine. Hepatitis B vaccine at 0, 1 and 6 months standard schedule. Non-responders (n=24) were those who had insufficient anti-hepatitis B antibody levels (< 10 mIU/ml) after a 2nd round of revaccination. Responders (n=46) had anti-hepatitis B antibody levels >= 100 mIU/ml after the first standard 3-dose immunization. Signific…	Allele T is associated with decreased response to Hepatitis vaccines as compared to allele C.	T			Is	Associated with	decreased	response to					C		0.43	0.41	0.36	0.69	0.43	0.56	0.4	SNP sin predominancia en alguna población	rs1295686-T
1446905079	1446905086	cohort	70			Unknown	0.101	C			= 0.032	OR	0.08	0.01	0.8	East Asian	rs1805015	IL4R	Hepatitis vaccines	21111021	Efficacy	yes	The C allele was associated with a protective immune response, that is, a lower chance of being a non-responder to hepatitis B vaccine. Hepatitis B vaccine at 0, 1 and 6 months standard schedule. Non-responders (n=24) were those who had insufficient anti-hepatitis B antibody levels (< 10 mIU/ml) after a 2nd round of revaccination. Responders (n=46) had anti-hepatitis B antibody levels >= 100 mIU/…	Allele C is associated with increased response to Hepatitis vaccines as compared to allele T.	C			Is	Associated with	increased	response to					T		0.56	0.21	0.186	0.365	0.221	0.4625	0.205667	SNP sin predominancia en alguna población	rs1805015-C
1446905193	1446905207	cohort	113		efavirenz; p-value is for final multivariable model, the T allele was associated with a 31% increase in log-transformed plasma [EFV] (beta=0.27, p<0.0001)	Drug	0.36	T			< 0.0001	OR				Sub-Saharan African	rs3745274	CYP2B6	efavirenz	25611810	Metabolism/PK	yes	When considered as part of a composite (rs3745274 T, rs28399499 C, and rs4803419 T), the T allele was strongly associated with plasma efavirenz concentrations (plasma [EFV]) [beta=0.28, 95% CI (0.21, 0.35) p=2.4 E-11]. In a final multivariable model the T allele was associated with a 31% increased in plasma [EFV] (beta=0.27). Post-hoc sensitivity analysis, in which two extreme outliers were exclu…	Allele T is associated with increased concentrations of efavirenz in people with HIV Infections as compared to allele G.	T	Pediatric		Is	Associated with	increased	concentrations of		in people with	Disease:HIV infectious disease		G		0.619	0.33	0.367	0.467	0.354	0.543	0.350333	SNP sin predominancia en alguna población	rs3745274-T
1446905210	1446905212	cohort	113		efavirenz; p-value is for final multivariable model, the C allele was associated with a 46% increase in log-transformed plasma [EFV] (beta=0.38, p<0.0001)	Drug	0.07	C	0.93	T	< 0.0001	OR				Sub-Saharan African	rs28399499	CYP2B6	efavirenz	25611810	Metabolism/PK	yes	When considered as part of a composite (rs3745274 T, rs28399499 C, and rs4803419 T), the C allele was strongly associated with plasma efavirenz concentrations (plasma [EFV]) [beta=0.28, 95% CI (0.21, 0.35) p=2.4 E-11]. In a final multivariable model the C allele was associated with a 46% increased in plasma [EFV] (beta=0.27). Post-hoc sensitivity analysis, in which two extreme outliers were exclu…	Allele C is associated with increased concentrations of efavirenz in people with HIV Infections as compared to allele T.	C	Pediatric		Is	Associated with	increased	concentrations of		in people with	Disease:HIV infectious disease		T		0.5	0.019	0.011	0.075	0.01	0.2875	0.0133333	SNP sin predominancia en alguna población	rs28399499-C
1446905219	1446905228	cohort	111		efavirenz; p-value is for final post-hoc sensitivity analysis, the T allele was associated with a 12% increase in log-transformed plasma [EFV] (beta=0.12, p=0.04)	Drug	0.09	T	0.91	C	= 0.04	OR				Sub-Saharan African	rs4803419	CYP2B6	efavirenz	25611810	Metabolism/PK	yes	When considered as part of a composite (rs3745274 T, rs28399499 C, and rs4803419 T), the T allele was strongly associated with plasma efavirenz concentrations (plasma [EFV]) [beta=0.28, 95% CI (0.21, 0.35) p=2.4 E-11]. In a final multivariable model the T allele was associated with a 6% increase in plasma [EFV] (beta=0.06). Post-hoc sensitivity analysis, in which two extreme outliers were exclude…	Allele T is associated with increased concentrations of efavirenz in people with HIV Infections as compared to allele C.	T	Pediatric		Is	Associated with	increased	concentrations of		in people with	Disease:HIV infectious disease		C		0.583	0.345	0.33		0.348	0.583	0.341	SNP sin predominancia en alguna población	rs4803419-T
1446906519	1446906525	replication, retrospective	333		Metastatic RCC patients treated with sunitinib and a DNA sample available were pooled from three exploratory studies conducted in the United States, Spain, and the Netherlands.	Study Cohort					= 0.039	OR	2.04	1.04	4	Multiple groups, 96% white	rs776746	CYP3A5	sunitinib	25930089	Dosage	yes	This is reported in abstract as *1 but according to supplementary table rs776746 is only variant in CYP3A5 measured.	Allele T is associated with decreased dose of sunitinib in people with Carcinoma, Renal Cell as compared to allele C.	T			Is	Associated with	decreased	dose of		in people with	Disease:Renal Cell Carcinoma		C		0.85	0.22		0.64	0.25	0.745	0.235	SNP sin predominancia en alguna población	rs776746-T
1446907580	1446907601	cohort	133		healthy Korean men	Study Cohort					= 0.001	OR				East Asian	rs4149056	SLCO1B1	simvastatin acid	26367500	Metabolism/PK	yes	Increased AUC of simvastatin acid are found in C allele carriers.	Allele C is associated with increased concentrations of simvastatin acid in healthy individuals as compared to genotype TT.	C			Is	Associated with	increased	concentrations of		in healthy individuals			TT		0.5	0.188	0.181	0.045	0.192	0.2725	0.187	SNP sin predominancia en alguna población	rs4149056-C
1446907621	1446907631	cohort, retrospective	189		lupus; p-value is for assoc. of SNP with CPA metabolite (4-OH-CPA) plasma concentrations during induction therapy.	Disease	0.312	A	0.688	G	< 0.001	OR				East Asian	rs4244285	CYP2C19	cyclophosphamide	26456622	Metabolism/PK	yes	The plasma concentration of cyclophosphamide (CPA) 20 hours post dose (C20h) was not significantly different between genotypes, but plasma concentrations of the CPA metabolite of 4-OH-CPA was significantly influenced by CYP2B6 -750T>C and CYP2C19*2 genotype (p<0.001). Patients with CYP2C19 *1/*1 genotype had much higher 4-OH-CPA concentrations compared to CYP2C19*1/*2 or *2*2 genotype.	Allele A is associated with decreased metabolism of cyclophosphamide in people with Lupus erythematosus as compared to allele G.	A			Is	Associated with	decreased	metabolism of		in people with	Disease:Lupus erythematosus		G		0.5	0.087	0.106	0.14	0.114	0.32	0.102333	SNP sin predominancia en alguna población	rs4244285-A
1446907636	1446907638	cohort, retrospective	189		lupus; p-value is for assoc. of SNP with CPA metabolite (4-OH-CPA) plasma concentrations during induction therapy. beta coefficient = -0.381, partial r sq. =0.215	Disease	0.56	C	0.44	T	< 0.001	OR				East Asian	rs4802101	CYP2B6	cyclophosphamide	26456622	Metabolism/PK	yes	The plasma concentration of cyclophosphamide (CPA) 20 hours post dose (C20h) was not significantly different between genotypes, but plasma concentrations of the active CPA metabolite of 4-OH-CPA was significantly influenced by CYP2B6 -750T>C and CYP2C19*2 genotype (p<0.001). Patients with CYP2B6 -750TT genotype had significantly higher 4-OH-CPA concentration (C20h median= 20.9 ng/mL) as compared …	Allele C is associated with decreased metabolism of cyclophosphamide in people with Lupus erythematosus as compared to allele T.	C			Is	Associated with	decreased	metabolism of		in people with	Disease:Lupus erythematosus		T		0.955	0.616	0.766			0.955	0.691	SNP sin predominancia en alguna población	rs4802101-C
1446907707	1446907709	cohort, retrospective	189		lupus; p-value is for assoc. of SNP with CPA metabolite (4-OH-CPA) plasma concentrations during induction therapy. beta coefficient = -0.166, partial r sq. =0.059	Disease	0.423	C	0.577	T	< 0.001	OR				East Asian	rs7254579	CYP2B6	cyclophosphamide	26456622	Metabolism/PK	yes	This SNP had a small but significant effect on cyclophosphamide (CPA) metabolite plasma concentrations (4-OH-CPA), but not on CPA concentrations (Bonferroni corrected p-value= 0.0056).	Allele C is associated with metabolism of cyclophosphamide in people with Lupus erythematosus as compared to allele T.	C			Is	Associated with		metabolism of		in people with	Disease:Lupus erythematosus		T		0.6	0.154	0.34	0.196	0.37	0.398	0.288	SNP sin predominancia en alguna población	rs7254579-C
1446907744	1446907752	cohort	377			Unknown					= 0.01	OR				Unknown	rs2070296	NRP1	ranibizumab	26426212	Efficacy	yes	Associated with change in visual acuity after 3 months of treatment in patients who received three monthly ranibizumab injections.	Allele T is associated with decreased response to ranibizumab in people with Macular Degeneration as compared to genotype CC.	T			Is	Associated with	decreased	response to		in people with	Disease:Macular Degeneration		CC		0.6	0.196	0.191			0.6	0.1935	SNP sin predominancia en alguna población	rs2070296-T
1447519925	1447519930	cohort, prospective	311			Unknown					= 8.3e-10	OR				Multiple groups, 98% white	rs9923231	VKORC1	warfarin	19752777	Dosage	yes		Allele T is associated with decreased dose of warfarin as compared to allele C.	T			Is	Associated with	decreased	dose of					C		0.5	0.326	0.42	0.145	0.377	0.3225	0.374333	SNP sin predominancia en alguna población	rs9923231-T
1447519932	1447519934	cohort, prospective	311			Unknown					= 2.55e-05	OR				Multiple groups, 98% white	rs1057910	CYP2C9	warfarin	19752777	Dosage	yes		Allele C is associated with decreased dose of warfarin as compared to allele A.	C			Is	Associated with	decreased	dose of					A		0.5	0.058	0.064	0.01		0.255	0.061	SNP sin predominancia en alguna población	rs1057910-C
1447519938	1447519940	cohort, prospective	311			Unknown					= 8.3e-10	OR				Multiple groups, 98% white	rs2860905	CYP2C9	warfarin	19752777	Dosage	yes		Allele A is associated with decreased dose of warfarin as compared to allele G.	A			Is	Associated with	decreased	dose of					G		0.525	0.198	0.218	0.28	0.173	0.4025	0.196333	SNP sin predominancia en alguna población	rs2860905-A
1447519944	1447519946	cohort, prospective	311			Unknown					= 8.3e-10	OR				Multiple groups, 98% white	rs2359612	VKORC1	warfarin	19752777	Dosage	yes		Allele A is associated with decreased dose of warfarin as compared to allele G.	A			Is	Associated with	decreased	dose of					G		0.18	0.47	0.44	0.23	0.41	0.205	0.44	SNP sin predominancia en alguna población	rs2359612-A
1447520009	1447520014	cohort	186			Unknown					< 0.001	OR				European	rs9923231	VKORC1	warfarin	26445138	Dosage	yes		Allele T is associated with decreased dose of warfarin as compared to allele C.	T			Is	Associated with	decreased	dose of					C		0.5	0.326	0.42	0.145	0.377	0.3225	0.374333	SNP sin predominancia en alguna población	rs9923231-T
1447520683	1447520695	cohort, retrospective	83			Unknown	0.313	T			< 0.02	OR				East Asian	rs2242480	CYP3A4	tacrolimus	26227094	Metabolism/PK	yes	At day 3 and 7 post-transplant and then > 3 months post-transplant. Note that the paper did not specify the number of individuals with the *1/*36 or *36/*36 genotype, only the number of *36 allele carriers. Additionally, *36 was found to be in significant linkage disequilibrium with CYP3A5*3 (r2 = 0.38, D' = 0.65, p < 0.01). The publication reports the finding for CYP3A4*1G. PharmVar re-assigned …	Allele T is associated with decreased dose-adjusted trough concentrations of tacrolimus in people with Kidney Transplantation as compared to genotype C/C.	T			Is	Associated with	decreased	dose-adjusted trough concentrations of		in people with	Disease:Kidney Transplantation		C/C		0.891	0.346	0.287		0.373	0.891	0.335333	SNP predominantes en ancestría africana	rs2242480-T
1447520749	1447520797	cohort	206		Diagnosed with opioid dependence at least one year, and having been on methadone for at least 2 months.	Disease						OR				East Asian	rs3745274	CYP2B6	methadone	25456329	Metabolism/PK	yes		Allele T is associated with decreased clearance of methadone in people with Opioid-Related Disorders as compared to allele G.	T			Is	Associated with	decreased	clearance of		in people with	Disease:Opioid-Related Disorders		G		0.619	0.33	0.367	0.467	0.354	0.543	0.350333	SNP sin predominancia en alguna población	rs3745274-T
1447573633	1447573635	cohort	214			Unknown					= 0.004	OR				Multiple groups	rs9934438	VKORC1	warfarin	19074728	Dosage	yes		Allele A is associated with decreased dose of warfarin as compared to allele G.	A			Is	Associated with	decreased	dose of					G		0.5	0.405	0.42	0.145	0.377	0.3225	0.400667	SNP sin predominancia en alguna población	rs9934438-A
1447674588	1447674594	cohort	172			Unknown					= 0.01	OR				Multiple groups, White, Hispanic, Asian/Pacific Islander, Other	rs2032582	ABCB1	sirolimus	26325438	Metabolism/PK	yes	Patients who were carriers of the A allele (i.e. genotypes AA, AT or AC) had higher median sirolimus levels as compared to non-A carriers (i.e. genotypes TT, CC or CT). Borderline significant findings were also observed for the dose-adjusted concentrations (C/D) of sirolimus (p=0.05). Please note that alleles have been complemented to the plus chromosomal strand.	Allele A is associated with increased concentrations of sirolimus in people with hematopoietic stem cell transplantation.	A			Is	Associated with	increased	concentrations of		in people with	Disease:Hematopoietic stem cell transplantation						0.46				0.46	SNP sin predominancia en alguna población	rs2032582-A
1447674863	1447674871	GWAS	350		24-h fentanyl consumption during postoperative period after laparoscopic-assisted colectomy	Study Cohort	0.76	G			= 0.0001	OR				East Asian	rs2076222	LAMB3	fentanyl	26566055	Dosage, Efficacy	yes	Fentanyl dose was patient-controlled. Authors state that SNP could be associated either with lower opioid sensitivity and/or higher pain sensitivity.	Allele G is associated with increased dose of fentanyl in people with Pain, Postoperative as compared to allele T.	G			Is	Associated with	increased	dose of		in people with	Disease:Pain, Postoperative		T		0.5	0.95	0.96	0.99	0.95	0.745	0.953333	SNP sin predominancia en alguna población	rs2076222-G
1447676364	1447676372	cohort, prospective	208		Total sample	Study Cohort	0.695	C			= 0.013	OR				Multiple groups	rs2514218	DRD2	clozapine	26666695	Efficacy	yes	as measured by change in brief psychiatric rating scale (BPRS)	Allele T is associated with increased response to clozapine in people with Schizophrenia as compared to allele C.	T			Is	Associated with	increased	response to		in people with	Disease:Schizophrenia		C		0.55	0.286	0.362		0.342	0.55	0.33	SNP sin predominancia en alguna población	rs2514218-T
1447676810	1447676818	cohort, meta-analysis, GWAS	459		Hypertension	Disease	0.91	T			= 1.55E-07	OR				African American/Afro-Caribbean	rs1367094	ZMAT4	atenolol, metoprolol	26729753	Efficacy	yes	In African Americans.; Association found in atenolol and metoprolol monotherapy, but not validated in a atenolol plus hydrochlorothiazide therapy	Allele T is associated with increased response to atenolol or metoprolol in people with Hypertension as compared to allele C.	T			Is	Associated with	increased	response to	or	in people with	Disease:Hypertension		C		0.956	0.947	0.995			0.956	0.971	SNP sin predominancia en alguna población	rs1367094-T
1447676920	1447676936	cohort	125		Schizophrenia	Disease	0.435	C			= 0.023	OR				East Asian	rs1079597	DRD2	amisulpride	25679126	Efficacy	yes	Korean; differences measured after at least 6 weeks treatment; treatment response defined as a reduction of at least 30% from the baseline.	Allele C is associated with increased response to amisulpride in people with Schizophrenia as compared to allele T.	C			Is	Associated with	increased	response to		in people with	Disease:Schizophrenia		T		0.5	0.86	0.85	0.82	0.78	0.66	0.83	SNP sin predominancia en alguna población	rs1079597-C
1447677221	1447677223	prospective	160		early stage breast cancer in post-menopausal women; p-value is for the additive model	Disease	0.41	A	0.59	G	= 0.000037	OR				Unknown	rs749292	CYP19A1	triglycerides	26463708	Other	yes	when taking letrozole. Data are from a sub-analysis of the Exemestane and Letrozole Pharmacogenomics (ELPh) study, where post-menopausal women with early stage breast cancer were randomized to receive exemestane or letrozole. Of the 303 eligible women, 160 were randomized to the letrozole group, 52 of whom were also taking LLA. This SNP was associated with decreases in triglycerides ranging from …	Allele A is associated with decreased concentrations of triglycerides in women with Breast Neoplasms and Menopause as compared to allele G.	A			Is	Associated with	decreased	concentrations of		in women with	Disease:Breast Neoplasms, Disease:Menopause	and	G		0.646	0.274	0.356	0.46	0.368	0.553	0.332667	SNP sin predominancia en alguna población	rs749292-A
1447677231	1447677233	prospective	52		early stage breast cancer in post-menopausal women	Disease	0.42	G	0.58	C	= 0.000043	OR				Unknown	rs1062033	CYP19A1	hdl cholesterol	26463708	Other	yes	when taking letrozole and lipid lowering agents (LLA), such as statins. Data are from a sub-analysis of the Exemestane and Letrozole Pharmacogenomics (ELPh) study, where post-menopausal women with early stage breast cancer were randomized to receive exemestane or letrozole. Of the 303 eligible women, 160 were randomized to the letrozole group, 52 of whom were also taking LLA. This SNP was associa…	Allele G is associated with increased concentrations of hdl cholesterol in women with Breast Neoplasms and Menopause as compared to allele C.	G			Is	Associated with	increased	concentrations of		in women with	Disease:Breast Neoplasms, Disease:Menopause	and	C		0.5	0.12	0.282	0.12		0.31	0.201	SNP sin predominancia en alguna población	rs1062033-G
1447677238	1447677240	prospective	52		early stage breast cancer in post-menopausal women	Disease	0.38	G	0.62	A	= 0.00037	OR				Unknown	rs1008805	CYP19A1	hdl cholesterol	26463708	Other	yes	when taking letrozole and lipid lowering agents (LLA), such as statins. Data are from a sub-analysis of the Exemestane and Letrozole Pharmacogenomics (ELPh) study, where post-menopausal women with early stage breast cancer were randomized to receive exemestane or letrozole. Of the 303 eligible women, 160 were randomized to the letrozole group, 52 of whom were also taking LLA. This SNP was associa…	Allele G is associated with decreased concentrations of hdl cholesterol in women with Breast Neoplasms and Menopause as compared to allele A.	G			Is	Associated with	decreased	concentrations of		in women with	Disease:Breast Neoplasms, Disease:Menopause	and	A		0.12		0.55	0.3		0.21	0.55	SNP sin predominancia en alguna población	rs1008805-G
1447677275	1447677277	prospective	52		early stage breast cancer in post-menopausal women	Disease	0.45	G	0.55	A	= 0.00046	OR				Unknown	rs10046	CYP19A1	hdl cholesterol	26463708	Other	yes	when taking letrozole and lipid lowering agents (LLA), such as statins. Data are from a sub-analysis of the Exemestane and Letrozole Pharmacogenomics (ELPh) study, where post-menopausal women with early stage breast cancer were randomized to receive exemestane or letrozole. Of the 303 eligible women, 160 were randomized to the letrozole group, 52 of whom were also taking LLA. This SNP was associa…	Allele G is associated with decreased concentrations of hdl cholesterol in women with Breast Neoplasms and Menopause as compared to allele A.	G			Is	Associated with	decreased	concentrations of		in women with	Disease:Breast Neoplasms, Disease:Menopause	and	A		0.44	0.61	0.65	0.75		0.595	0.63	SNP sin predominancia en alguna población	rs10046-G
1447677286	1447677288	prospective	160		early stage breast cancer in post-menopausal women;	Disease	0.48	C	0.52	T	= 0.0000074	OR				Unknown	rs2289105	CYP19A1	triglycerides	26463708	Other	yes	when taking letrozole alone or with lipid lowering agents (LLA), such as statins. Data are from a sub-analysis of the Exemestane and Letrozole Pharmacogenomics (ELPh) study, where post-menopausal women with early stage breast cancer were randomized to receive exemestane or letrozole. Of the 303 eligible women, 160 were randomized to the letrozole group, 52 of whom were also taking LLA. This SNP w…	Allele C is associated with decreased concentrations of triglycerides in women with Breast Neoplasms and Menopause as compared to allele T.	C			Is	Associated with	decreased	concentrations of		in women with	Disease:Breast Neoplasms, Disease:Menopause	and	T		0.571	0.385	0.362	0.235		0.403	0.3735	SNP sin predominancia en alguna población	rs2289105-C
1447677307	1447677309	prospective	160		early stage breast cancer in post-menopausal women;	Disease	0.48	A	0.52	G	= 0.0000069	OR				Unknown	rs10046	CYP19A1	triglycerides	26463708	Other	yes	when taking letrozole alone or with lipid lowering agents (LLA), such as statins. Data are from a sub-analysis of the Exemestane and Letrozole Pharmacogenomics (ELPh) study, where post-menopausal women with early stage breast cancer were randomized to receive exemestane or letrozole. Of the 303 eligible women, 160 were randomized to the letrozole group, 52 of whom were also taking LLA. This SNP w…	Allele A is associated with decreased concentrations of triglycerides in women with Breast Neoplasms and Menopause as compared to allele G.	A			Is	Associated with	decreased	concentrations of		in women with	Disease:Breast Neoplasms, Disease:Menopause	and	G		0.562	0.386	0.346	0.25		0.406	0.366	SNP sin predominancia en alguna población	rs10046-A
1447677354	1447677356	prospective	160		early stage breast cancer in post-menopausal women	Disease	0.43	C	0.57	T	= 0.00045	OR				Unknown	rs3759811	CYP19A1	triglycerides	26463708	Other	yes	when taking letrozole. Data are from a sub-analysis of the Exemestane and Letrozole Pharmacogenomics (ELPh) study, where post-menopausal women with early stage breast cancer were randomized to receive exemestane or letrozole. Of the 303 eligible women, 160 were randomized to the letrozole group, 52 of whom were also taking LLA. This SNP was associated with decreases in triglycerides of 32.3 mg/dL…	Allele C is associated with decreased concentrations of triglycerides in women with Breast Neoplasms and Menopause as compared to allele T.	C			Is	Associated with	decreased	concentrations of		in women with	Disease:Breast Neoplasms, Disease:Menopause	and	T		0.654	0.359	0.319	0.197		0.4255	0.339	SNP sin predominancia en alguna población	rs3759811-C
1447677364	1447677366	prospective	160		early stage breast cancer in post-menopausal women	Disease	0.44	C			= 0.00019	OR				Unknown	rs700518	CYP19A1	triglycerides	26463708	Other	yes	when taking letrozole alone or with lipid lowering agents (LLA), such as statins. Data are from a sub-analysis of the Exemestane and Letrozole Pharmacogenomics (ELPh) study, where post-menopausal women with early stage breast cancer were randomized to receive exemestane or letrozole. Of the 303 eligible women, 160 were randomized to the letrozole group, 52 of whom were also taking LLA. This SNP w…	Allele C is associated with decreased concentrations of triglycerides in women with Breast Neoplasms and Menopause as compared to allele A.	C			Is	Associated with	decreased	concentrations of		in women with	Disease:Breast Neoplasms, Disease:Menopause	and	A		0.654	0.364	0.319	0.2	0.343	0.427	0.342	SNP sin predominancia en alguna población	rs700518-C
1447677374	1447677376	prospective	160		early stage breast cancer in post-menopausal women;	Disease	0.41	C	0.59	T	= 0.00028	OR				Unknown	rs4775936	CYP19A1	triglycerides	26463708	Other	yes	when taking letrozole and lipid lowering agents (LLA), such as statins. Data are from a sub-analysis of the Exemestane and Letrozole Pharmacogenomics (ELPh) study, where post-menopausal women with early stage breast cancer were randomized to receive exemestane or letrozole. Of the 303 eligible women, 160 were randomized to the letrozole group, 52 of whom were also taking LLA. This SNP was associa…	Allele C is associated with decreased concentrations of triglycerides in women with Breast Neoplasms and Menopause as compared to allele T.	C			Is	Associated with	decreased	concentrations of		in women with	Disease:Breast Neoplasms, Disease:Menopause	and	T		0.44	0.83	0.71	0.84		0.64	0.77	SNP sin predominancia en alguna población	rs4775936-C
1447677393	1447677395	prospective	160		early stage breast cancer in post-menopausal women;	Disease	0.27	A	0.73	C	= 0.00043	OR				Unknown	rs4646	CYP19A1	hdl cholesterol	26463708	Other	yes	when taking letrozole alone or with lipid lowering agents (LLA), such as statins. Data are from a sub-analysis of the Exemestane and Letrozole Pharmacogenomics (ELPh) study, where post-menopausal women with early stage breast cancer were randomized to receive exemestane or letrozole. Of the 303 eligible women, 160 were randomized to the letrozole group, 52 of whom were also taking LLA. This SNP w…	Allele A is associated with decreased concentrations of hdl cholesterol in women with Breast Neoplasms and Menopause as compared to allele C.	A			Is	Associated with	decreased	concentrations of		in women with	Disease:Breast Neoplasms, Disease:Menopause	and	C		0.25	0.48	0.41	0.36	0.42	0.305	0.436667	SNP sin predominancia en alguna población	rs4646-A
1447677450	1447677452	prospective	52		early stage breast cancer in post-menopausal women;	Disease	0.45	T	0.55	C	= 0.00046	OR				Unknown	rs2289105	CYP19A1	hdl cholesterol	26463708	Other	yes	when taking letrozole and lipid lowering agents (LLA), such as statins. Data are from a sub-analysis of the Exemestane and Letrozole Pharmacogenomics (ELPh) study, where post-menopausal women with early stage breast cancer were randomized to receive exemestane or letrozole. Of the 303 eligible women, 160 were randomized to the letrozole group, 52 of whom were also taking LLA. This SNP was associa…	Allele T is associated with decreased concentrations of hdl cholesterol in women with Breast Neoplasms and Menopause as compared to allele C.	T			Is	Associated with	decreased	concentrations of		in women with	Disease:Breast Neoplasms, Disease:Menopause	and	C		0.43	0.61	0.64	0.77		0.6	0.625	SNP sin predominancia en alguna población	rs2289105-T
1447678850	1447678859	cohort	263		Chronic schizophrenia patients who have been on a consistent dose and heterogeneous medications. Most were receiving olanzapine, clozapine or risperidol.	Drug					= 0.02	OR				European	rs16860087	GABRB1	antipsychotics	26780210	Dosage	yes	Associated allele was not explicitly stated so assumed the minor allele for the annotation. Significance was for dosage as measured by percentage of maximum dose and chlorpromazine equivalent dose.	Allele A is associated with increased dose of antipsychotics in people with schizoaffective disorder and Schizophrenia as compared to allele C.	A			Is	Associated with	increased	dose of		in people with	Disease:Schizoaffective disorder, Disease:Schizophrenia	and	C		0.675	0.034	0.176			0.675	0.105	SNP sin predominancia en alguna población	rs16860087-A
1447678861	1447678863	cohort	263		Chronic schizophrenia patients who have been on a consistent dose and heterogeneous medications. Most were receiving olanzapine, clozapine or risperidol.	Drug					= 0.02	OR				European	rs4627835	GABRB1	antipsychotics	26780210	Dosage	yes	Associated allele was not explicitly stated so assumed the minor allele for the annotation. Significance was for dosage as measured by percentage of maximum dose and chlorpromazine equivalent dose.	Allele T is associated with increased dose of antipsychotics in people with schizoaffective disorder and Schizophrenia as compared to allele A.	T			Is	Associated with	increased	dose of		in people with	Disease:Schizoaffective disorder, Disease:Schizophrenia	and	A		0.583		0.181			0.583	0.181	SNP sin predominancia en alguna población	rs4627835-T
1447678959	1447678985	cohort	101	95	Alzheimer Disease, treated with one of three drugs: donepezil, galantamine, or rivastigmine.	Disease	0.292	A	0.136	A	= 0.03	OR				East Asian	rs2177370	CHAT	donepezil, galantamine, rivastigmine	25730470	Efficacy	yes	Presented as trend test of CC,TC, and TT (reverse strand) in responder vs non responder.; Donepezil 84 patients, galantamine 52 patients, rivastigmine 22 patients. No significant differences in genotype by drug type. Patients assessed after 1 week and 4 weeks of therapy to adjust dosage and evaluate adverse events. Response rate assessed at 26 weeks of treatment.	Allele A is associated with increased response to donepezil, galantamine or rivastigmine in people with Alzheimer Disease as compared to allele G.	A			Is	Associated with	increased	response to	or	in people with	Disease:Alzheimer Disease		G		0.28	0.69	0.47	0.45		0.365	0.58	SNP sin predominancia en alguna población	rs2177370-A
1447678987	1447678989	cohort	102	55	Alzheimer Disease, treated with one of three drugs: donepezil, galantamine, or rivastigmine.	Disease	0.706	A	0.855	A	= 0.03	OR				East Asian	rs3793790	CHAT	donepezil, galantamine, rivastigmine	25730470	Efficacy	yes	Presented as trend test of AA,AG, and GG in responder vs non responder.; Donepezil 84 patients, galantamine 52 patients, rivastigmine 22 patients. No significant differences in genotype by drug type. Patients assessed after 1 week and 4 weeks of therapy to adjust dosage and evaluate adverse events. Response rate assessed at 26 weeks of treatment.	Allele G is associated with increased response to donepezil, galantamine or rivastigmine in people with Alzheimer Disease as compared to allele A.	G			Is	Associated with	increased	response to	or	in people with	Disease:Alzheimer Disease		A		0.29	0.3	0.31			0.29	0.305	SNP sin predominancia en alguna población	rs3793790-G
1447680222	1447680231	meta-analysis	626	181	Cases = responders, controls = non-responders	Study Cohort					= 0.00012	OR	1.954	1.388	2.75	Multiple groups	rs1800629	TNF	Tumor necrosis factor alpha (TNF-alpha) inhibitors	26244882	Efficacy	yes		Allele G is associated with increased response to Tumor necrosis factor alpha (TNF-alpha) inhibitors in people with Crohn Disease, Inflammatory Bowel Diseases, Psoriasis or Spondylarthropathies as compared to allele A.	G			Is	Associated with	increased	response to		in people with	Disease:Crohn Disease, Disease:Inflammatory Bowel Diseases, Disease:Psoriasis, Disease:Spondylarthropathies	or	A		0.44	0.97	0.93	0.88		0.66	0.95	SNP sin predominancia en alguna población	rs1800629-G
1447680238	1447680240	meta-analysis	294	79	Cases = responders, controls = non-responders	Study Cohort					= 0.011	OR	2.208	1.197	4.074	Multiple groups	rs361525	TNF	Tumor necrosis factor alpha (TNF-alpha) inhibitors	26244882	Efficacy	yes		Allele G is associated with increased response to Tumor necrosis factor alpha (TNF-alpha) inhibitors in people with Crohn Disease, Inflammatory Bowel Diseases, Psoriasis and Spondylarthropathies as compared to allele A.	G			Is	Associated with	increased	response to		in people with	Disease:Crohn Disease, Disease:Inflammatory Bowel Diseases, Disease:Psoriasis, Disease:Spondylarthropathies	and	A		0.5	0.97	0.94	0.96	0.93	0.73	0.946667	SNP sin predominancia en alguna población	rs361525-G
1447680253	1447680255	meta-analysis	341	77	Cases = responders, controls = non-responders	Study Cohort					= 0.003	OR	1.889	1.245	2.866	Multiple groups	rs1799724	TNF	Tumor necrosis factor alpha (TNF-alpha) inhibitors	26244882	Efficacy	yes		Allele C is associated with increased response to Tumor necrosis factor alpha (TNF-alpha) inhibitors in people with Crohn Disease, Inflammatory Bowel Diseases, Psoriasis and Spondylarthropathies as compared to allele T.	C			Is	Associated with	increased	response to		in people with	Disease:Crohn Disease, Disease:Inflammatory Bowel Diseases, Disease:Psoriasis, Disease:Spondylarthropathies	and	T		0.5	0.98	0.83	0.95	0.82	0.725	0.876667	SNP sin predominancia en alguna población	rs1799724-C
1447680563	1447680565	GWAS, prospective	711		711 patients starting warfarin was followed up for 6 months	Study Cohort					= 7.7e-3	OR				Unknown	rs2108622	CYP4F2	warfarin	26739746	Dosage	yes	The CYP4F2 variant only plays a small effect on warfarin mean weekly dose (MWD). It explained only a further 0.5 % of the MWD variance.	Allele T is associated with dose of warfarin as compared to allele C.	T			Is	Associated with		dose of					C		0.556	0.275	0.282	0.075	0.278	0.3155	0.278333	SNP sin predominancia en alguna población	rs2108622-T
1447680618	1447680624	meta-analysis	637		Asthma	Disease					= 0.0021	OR	1.52	1.17	1.99	Unknown	rs1042713	ADRB2	corticosteroids, selective beta-2-adrenoreceptor agonists	26774659	Efficacy	yes		Allele A is associated with decreased response to corticosteroids and selective beta-2-adrenoreceptor agonists in children with Asthma as compared to genotype GG.	A	Pediatric		Is	Associated with	decreased	response to	and	in children with	Disease:Asthma		GG		0.732	0.45	0.516	0.49	0.469	0.611	0.478333	SNP sin predominancia en alguna población	rs1042713-A
1447680746	1447680748	cohort	222		HIV/AIDs patients, were receiving EFV-based treatment for at least 6 months.	Disease	0.419	T			< 0.0001	OR				Sub-Saharan African	rs3745274	CYP2B6	efavirenz	26779253	Metabolism/PK	yes		Allele T is associated with increased concentrations of efavirenz in people with HIV Infections as compared to allele G.	T			Is	Associated with	increased	concentrations of		in people with	Disease:HIV infectious disease		G		0.619	0.33	0.367	0.467	0.354	0.543	0.350333	SNP sin predominancia en alguna población	rs3745274-T
1447680752	1447680754	cohort	221		HIV/AIDs patients, were receiving EFV-based treatment for at least 6 months.	Disease	0.593	A			< 0.0001	OR				Sub-Saharan African	rs2279343	CYP2B6	efavirenz	26779253	Metabolism/PK	yes		Allele G is associated with increased concentrations of efavirenz in people with HIV Infections as compared to allele A.	G			Is	Associated with	increased	concentrations of		in people with	Disease:HIV infectious disease		A		0.633	0.329				0.633	0.329	SNP sin predominancia en alguna población	rs2279343-G
1447681639	1447681645	meta-analysis	403		schizophrenia	Disease	0.41	G			= 7.62E-4	OR	1.79	1.27	2.52	Central/South Asian	rs4795893	CCL2	antipsychotics	26788534	Efficacy	yes	In low severity schizophrenia patient subgroup	Allele G is associated with decreased response to antipsychotics in people with Schizophrenia as compared to allele A.	G			Is	Associated with	decreased	response to		in people with	Disease:Schizophrenia		A		0.27	0.81	0.48	0.32	0.44	0.295	0.576667	SNP sin predominancia en alguna población	rs4795893-G
1447681648	1447681650	meta-analysis	403		schizophrenia	Disease	0.39	T			= 1.13E-3	OR	1.77	1.24	2.43	Central/South Asian	rs4586	CCL2	antipsychotics	26788534	Efficacy	yes	In low severity schizophrenia patient subgroup	Allele T is associated with decreased response to antipsychotics in people with Schizophrenia as compared to allele C.	T			Is	Associated with	decreased	response to		in people with	Disease:Schizophrenia		C		0.19	0.44	0.45		0.43	0.19	0.44	SNP sin predominancia en alguna población	rs4586-T
1447681659	1447681661	meta-analysis	403		schizophrenia	Disease	0.31	A			= 1.44E-3	OR	0.53	0.36	0.78	Central/South Asian	rs2513265		antipsychotics	26788534	Efficacy	yes	In low severity schizophrenia patient subgroup	Allele A is associated with increased response to antipsychotics in people with Schizophrenia as compared to allele T.	A			Is	Associated with	increased	response to		in people with	Disease:Schizophrenia		T		0.605	0.167	0.42			0.605	0.2935	SNP sin predominancia en alguna población	rs2513265-A
1447681665	1447681667	meta-analysis	339		schizophrenia	Disease	0.08	C			= 7.68E-4	OR	0.36	0.19	0.65	Central/South Asian	rs1544938	ADCY2	antipsychotics	26788534	Efficacy	yes	In high severity schizophrenia patient subgroup	Allele C is associated with increased response to antipsychotics in people with Schizophrenia as compared to allele G.	C			Is	Associated with	increased	response to		in people with	Disease:Schizophrenia		G		0.5	0.067	0.245			0.5	0.156	SNP sin predominancia en alguna población	rs1544938-C
1447681671	1447681674	meta-analysis	339		schizophrenia	Disease	0.09	G			= 6.81E-3	OR	0.42	0.23	0.79	Central/South Asian	rs13250975	NRG1	antipsychotics	26788534	Efficacy	yes	In high severity schizophrenia patient subgroup	Allele G is associated with increased response to antipsychotics in people with Schizophrenia as compared to allele A.	G			Is	Associated with	increased	response to		in people with	Disease:Schizophrenia		A		0.5	0.065	0.128			0.5	0.0965	SNP sin predominancia en alguna población	rs13250975-G
1447681685	1447681687	meta-analysis	339		schizophrenia	Disease	0.38	A			= 8.71E-3	OR	1.78	1.15	2.75	Central/South Asian	rs17716295	NRG1	antipsychotics	26788534	Efficacy	yes	In high severity schizophrenia patient subgroup	Allele A is associated with decreased response to antipsychotics in people with Schizophrenia as compared to allele C.	A			Is	Associated with	decreased	response to		in people with	Disease:Schizophrenia		C		0.528	0.093	0.213	0.2		0.364	0.153	SNP sin predominancia en alguna población	rs17716295-A
1447682270	1447682276	cohort	32		Children diagnosed with chronic hepatitis C virus (HCV) genotype 1 infection and were treated with peginterferon (PEG-IFN) monotherapy or PEG-IFN/ribavirin (RBV) combination therapy	Study Cohort					= 0.021	OR				East Asian	rs8099917	IFNL3	peginterferon alfa-2a, peginterferon alfa-2b, ribavirin	26825765	Efficacy	yes	SVR was achieved in more patients in the IL28B major allele group than in the minor allele group (15/17 vs. 7/15) after PEG-IFN/RBV combination therapy in children with HCV genotype-1 infection.	Allele T is associated with increased response to peginterferon alfa-2a, peginterferon alfa-2b and ribavirin in children with Hepatitis C as compared to allele G.	T	Pediatric		Is	Associated with	increased	response to	and	in children with	Disease:Hepatitis C virus infection		G		0.5	0.83	0.73	0.91	0.68	0.705	0.746667	SNP sin predominancia en alguna población	rs8099917-T
1447682452	1447682458	cohort	256		HCV-1 Caucasian treatment-experienced patients with compensated cirrhosis treated with triple therapy including telaprevir or boceprevir.	Study Cohort					= 2e-4	OR	2.35	1.5	3.7	European	rs12979860	IFNL3, IFNL4	boceprevir, peginterferon alfa-2a, peginterferon alfa-2b, ribavirin, telaprevir	26670100	Efficacy	yes	The favorable allele C of rs12979860 was significantly associated with SVR to triple therapy including telaprevir or boceprevir in patients with compensated cirrhosis chronically infected with HCV-1. The effect of rs12979860 on triple therapy-induced clearance in treatment-experienced patients is restricted to those who experienced prior PegIFN/RBV relapse.	Allele C is associated with increased response to boceprevir, peginterferon alfa-2a, peginterferon alfa-2b, ribavirin or telaprevir in people with Hepatitis C, Chronic as compared to allele T.	C			Is	Associated with	increased	response to	or	in people with	Disease:Chronic hepatitis C virus infection		T		0.22	0.57	0.59		0.52	0.22	0.56	SNP sin predominancia en alguna población	rs12979860-C
1447682776	1447682782	cohort	310			Unknown	0.884	C			< 0.0001	OR				East Asian	rs116855232	NUDT15	mercaptopurine	26503813	Dosage	yes	Children with very high-risk acute lymphoblastic leukemia (ALL) were excluded. Remaining patients had standard- or high-risk ALL. The maximal tolerable daily doses of mercaptopurine in the TT, CT and CC genotypes were 9.4, 30.7 and 44.1mg/m2, respectively.	Allele T is associated with decreased dose of mercaptopurine in children with Precursor Cell Lymphoblastic Leukemia-Lymphoma as compared to allele C.	T	Pediatric		Is	Associated with	decreased	dose of		in children with	Disease:Acute lymphoblastic leukemia		C			0.023	0.021		0.022		0.022	SNP sin predominancia en alguna población	rs116855232-T
1447813633	1447813640	meta-analysis, GWAS	2563		Consortium of Lithium Genetics	Study Cohort	0.94	T	0.06	C	= 1.37E-8	OR				Multiple groups, European, Asian, Other	rs79663003		lithium	26806518	Efficacy	yes	Patients had been taking lithium for at least 6 mo. Response to lithium was assayed using the Alda scale, which quantifies symptom improvement over time. The scale is from 0-10, with 10 being the highest response score and 0 being the lowest. The authors evaluated response using a dichotomous (=7 is "responder" and < 7 is "non-responder") and a continuous phenotype (0-10). This SNP was found to b…	Allele T is associated with increased response to lithium in people with Bipolar Disorder as compared to allele C.	T			Is	Associated with	increased	response to		in people with	Disease:Bipolar Disorder		C		0.5		0.97			0.5	0.97	SNP sin predominancia en alguna población	rs79663003-T
1447813645	1447813647	meta-analysis, GWAS	2563		Consortium of Lithium Genetics	Study Cohort	0.94	T	0.06	C	= 1.31E-8	OR				Multiple groups, European, Asian, Other	rs78015114		lithium	26806518	Efficacy	yes	Patients had been taking lithium for at least 6 mo. Response to lithium was assayed using the Alda scale, which quantifies symptom improvement over time. The scale is from 0-10, with 10 being the highest response score and 0 being the lowest. The authors evaluated response using a dichotomous (=7 is "responder" and < 7 is "non-responder") and a continuous phenotype (0-10). This SNP was found to b…	Allele T is associated with increased response to lithium in people with Bipolar Disorder as compared to allele C.	T			Is	Associated with	increased	response to		in people with	Disease:Bipolar Disorder		C		0.5	0.96	0.96			0.5	0.96	SNP sin predominancia en alguna población	rs78015114-T
1447813652	1447813654	meta-analysis, GWAS	2563		Consortium of Lithium Genetics	Study Cohort	0.94	G	0.06	A	= 3.31E-9	OR				Multiple groups, European, Asian, Other	rs74795342		lithium	26806518	Efficacy	yes	Patients had been taking lithium for at least 6 mo. Response to lithium was assayed using the Alda scale, which quantifies symptom improvement over time. The scale is from 0-10, with 10 being the highest response score and 0 being the lowest. The authors evaluated response using a dichotomous (=7 is "responder" and < 7 is "non-responder") and a continuous phenotype (0-10). This SNP was found to b…	Allele G is associated with increased response to lithium in people with Bipolar Disorder as compared to allele A.	G			Is	Associated with	increased	response to		in people with	Disease:Bipolar Disorder		A		0.5		0.98			0.5	0.98	SNP sin predominancia en alguna población	rs74795342-G
1447813659	1447813661	meta-analysis, GWAS	2563		Consortium of Lithium Genetics	Study Cohort	0.94	T	0.06	G	= 3.50E-9	OR				Multiple groups, European, Asian, Other	rs75222709		lithium	26806518	Efficacy	yes	Patients had been taking lithium for at least 6 mo. Response to lithium was assayed using the Alda scale, which quantifies symptom improvement over time. The scale is from 0-10, with 10 being the highest response score and 0 being the lowest. The authors evaluated response using a dichotomous (=7 is "responder" and < 7 is "non-responder") and a continuous phenotype (0-10). This SNP was found to b…	Allele T is associated with increased response to lithium in people with Bipolar Disorder as compared to allele G.	T			Is	Associated with	increased	response to		in people with	Disease:Bipolar Disorder		G		0.5	0.97	0.98			0.5	0.975	SNP sin predominancia en alguna población	rs75222709-T
1447814198	1447814204	cohort, meta-analysis, GWAS	4548		Cotinine Consortium	Study Cohort	0.9041	A	0.0959	G	= 5.89E-10	OR				European	rs77107237		cotinine	26833182	Metabolism/PK	yes	The authors conducted a GWAS meta-analysis to identify genetic variants associated with cotinine in current daily smokers (Caucasian). The following study cohorts were analyzed: ALSPAC, CARDIA, FinnTwin, Framingham, GenMets, MESA, NESDA, NTR, TwinsUK, YFS. The SNP was associated with a ~39 ng/ml increase in plasma/serum cotinine and accounted for 0.87% variance in cotinine levels.	Allele G is associated with increased concentrations of cotinine in people with Tobacco Use Disorder as compared to allele A.	G			Is	Associated with	increased	concentrations of		in people with	Disease:Tobacco Use Disorder		A		0.611	0.136	0.085			0.611	0.1105	SNP sin predominancia en alguna población	rs77107237-G
1447814206	1447814208	cohort, meta-analysis, GWAS	4548		Cotinine Consortium	Study Cohort	0.4062	A	0.5938	G	= 5.89E-10	OR				European	rs10851907	CHRNB4	cotinine	26833182	Metabolism/PK	yes	The authors conducted a GWAS meta-analysis to identify genetic variants associated with cotinine in current daily smokers (Caucasian). The following study cohorts were analyzed: ALSPAC, CARDIA, FinnTwin, Framingham, GenMets, MESA, NESDA, NTR, TwinsUK, YFS. The SNP was associated with a ~34 ng/ml increase in plasma/serum cotinine and accounted for 1.75% variance in cotinine levels.	Allele A is associated with increased concentrations of cotinine in people with Tobacco Use Disorder as compared to allele G.	A			Is	Associated with	increased	concentrations of		in people with	Disease:Tobacco Use Disorder		G		0.559	0.224	0.468		0.36	0.559	0.350667	SNP sin predominancia en alguna población	rs10851907-A
1447814214	1447814217	cohort, meta-analysis, GWAS	4548		Cotinine Consortium	Study Cohort	0.248	A	0.752	C	= 2.92E-8	OR				European	rs57064725	PSMA4	cotinine	26833182	Metabolism/PK	yes	The authors conducted a GWAS meta-analysis to identify genetic variants associated with cotinine in current daily smokers (Caucasian). The following study cohorts were analyzed: ALSPAC, CARDIA, FinnTwin, Framingham, GenMets, MESA, NESDA, NTR, TwinsUK, YFS. This SNP was detected as a residual association after accounting for rs10851907.	Allele A is associated with increased concentrations of cotinine in people with Tobacco Use Disorder as compared to allele C.	A			Is	Associated with	increased	concentrations of		in people with	Disease:Tobacco Use Disorder		C		0.611	0.351	0.41			0.611	0.3805	SNP sin predominancia en alguna población	rs57064725-A
1447814223	1447814225	cohort, meta-analysis, GWAS	4548		Cotinine Consortium	Study Cohort	0.3343	A	0.6657	G	= 6.91E-17	OR				European	rs16969968	CHRNA5	cotinine	26833182	Metabolism/PK	yes	The authors conducted a GWAS meta-analysis to identify genetic variants associated with cotinine in current daily smokers (Caucasian). The following study cohorts were analyzed: ALSPAC, CARDIA, FinnTwin, Framingham, GenMets, MESA, NESDA, NTR, TwinsUK, YFS. This SNP was re-analyzed because of previous evidence demonstrating association with smoking quantity. It was also significantly associated wi…	Allele A is associated with increased concentrations of cotinine in people with Tobacco Use Disorder as compared to allele G.	A			Is	Associated with	increased	concentrations of		in people with	Disease:Tobacco Use Disorder		G			0.239	0.346	0.05	0.239	0.05	0.274667	SNP sin predominancia en alguna población	rs16969968-A
1447814229	1447814231	cohort, meta-analysis, GWAS	4548		Cotinine Consortium	Study Cohort	0.2239	A	0.7761	G	= 1.51E-9	OR				European	rs7170068	CHRNA3	cotinine	26833182	Metabolism/PK	yes	The authors conducted a GWAS meta-analysis to identify genetic variants associated with cotinine in current daily smokers (Caucasian). The following study cohorts were analyzed: ALSPAC, CARDIA, FinnTwin, Framingham, GenMets, MESA, NESDA, NTR, TwinsUK, YFS. This SNP was detected as a residual association after accounting for rs16969968.	Allele A is associated with increased concentrations of cotinine in people with Tobacco Use Disorder as compared to allele G.	A			Is	Associated with	increased	concentrations of		in people with	Disease:Tobacco Use Disorder		G		0.647	0.347	0.378			0.647	0.3625	SNP sin predominancia en alguna población	rs7170068-A
1447943994	1447944000	cohort	1402		Duke Catheterization Genetics (CATHGEN) biorepository, LDL-c	Study Cohort	0.148	C			< 0.001	OR				European	rs4149056	SLCO1B1	hmg coa reductase inhibitors	25916517	Efficacy	yes	as measured by plasma LDL-c.	Allele C is associated with decreased response to hmg coa reductase inhibitors in people with Cardiovascular Diseases as compared to allele T.	C			Is	Associated with	decreased	response to		in people with	Disease:Cardiovascular Disease		T		0.5	0.188	0.181	0.045	0.192	0.2725	0.187	SNP sin predominancia en alguna población	rs4149056-C
1447944114	1447944174	cohort, meta-analysis	1568		Asthma cohorts: BREATHE, PACMAN, PAGES. Replicated in CAMP trial, PASS cohort, and GALA II study.	Disease					= 0.01	OR	1.35	1.07	1.69	Unknown	rs138335	ST13	corticosteroids	25616159	Efficacy	yes	Outcome measured was hospital visits for airway exacerbation. Effect is additive, measured per G allele.	Allele G is associated with decreased response to corticosteroids in children with Asthma as compared to allele C.	G	Pediatric		Is	Associated with	decreased	response to		in children with	Disease:Asthma		C		0.985	0.738	0.771			0.985	0.7545	SNP sin predominancia en alguna población	rs138335-G
1447944175	1447944177	cohort, meta-analysis	1568		Asthma cohorts: BREATHE, PACMAN, PAGES. Replicated in CAMP trial, PASS cohort, and GALA II study.	Disease					= 0.003	OR	1.33	1.11	1.6	Unknown	rs138337	ST13	corticosteroids	25616159	Efficacy	yes	Outcome measured was hospital visits for airway exacerbation. Effect is additive, measured per G allele.	Allele G is associated with decreased response to corticosteroids in children with Asthma as compared to allele A.	G	Pediatric		Is	Associated with	decreased	response to		in children with	Disease:Asthma		A		0.636	0.554	0.612			0.636	0.583	SNP sin predominancia en alguna población	rs138337-G
1447944264	1447944286	cohort, retrospective	20	1585	Multicenter fluoropyrimidine patients	Drug	0.009	C			= 0.015	OR	3.7	1.29	10.8	Unknown	rs183205964	TYMS	capecitabine, fluorouracil, tegafur	26189437	Toxicity	yes	Discontinuation due to severe toxicity: gastrointestinal, hematological, and other treatment-related hospitalization.	Allele C is associated with increased discontinuation of capecitabine, fluorouracil or tegafur in people with Neoplasms as compared to allele G.	C			Is	Associated with	increased	discontinuation of	or	in people with	Disease:Neoplasms		G				0				0	SNP sin predominancia en alguna población	rs183205964-C
1447944531	1447944539	cohort	302		EULAR good response defined as a change of DAS28 >1.2 and DAS28 at 14 weeks =3.2	Study Cohort	0.535	A			= 0.017	OR	1.53	1.08	2.17	European	rs1801274	FCGR2A	adalimumab	25823785	Efficacy	yes	as measured by DAS28 after 14 weeks treatment.	Allele A is associated with increased response to adalimumab in people with Arthritis, Rheumatoid as compared to allele G.	A			Is	Associated with	increased	response to		in people with	Disease:Rheumatoid arthritis		G		0.3	0.53	0.61	0.51		0.405	0.57	SNP sin predominancia en alguna población	rs1801274-A
1447947045	1447947051	cohort	669			Unknown	0.002	T			= 0.0024	OR				African American/Afro-Caribbean	rs11591147	PCSK9	hmg coa reductase inhibitors	26902539	Efficacy	yes	There was a 55.6% greater reduction in low-density lipoprotein cholesterol (LDL-C) in carriers of the T alleles as compared to those with the GG genotype. Note that carriers of the T allele were also associated with significantly decreased LDL-C levels at baseline (p=0.00022), though the result for response to statins was adjusted for this association. A p-value <0.0045 was considered statistical…	Allele T is associated with increased response to hmg coa reductase inhibitors in people with Hypercholesterolemia as compared to genotype GG.	T			Is	Associated with	increased	response to		in people with	Disease:Hypercholesterolemia		GG			0.002	0.005		0.003		0.00333333	SNP sin predominancia en alguna población	rs11591147-T
1447949320	1447949327	case/control	12	23	cases = responders, controls = non-responders	Study Cohort					< 0.0001	OR				European	rs10901080	ASS1	hydroxyurea	26895070	Efficacy	yes	Patients with plateau fetal hemoglobin (HbF) levels below 20% were considered ‘HU nonresponders’, while patients with plateau HbF levels rising over 20% were considered ‘HU responders’.	Allele T is associated with increased response to hydroxyurea in people with Anemia, Sickle Cell and beta-Thalassemia as compared to allele G.	T			Is	Associated with	increased	response to		in people with	"Disease:Anemia, Sickle Cell", "Disease:Beta-thalassemia and related diseases"	and	G		0.611	0.077	0.112		0.102	0.611	0.097	SNP sin predominancia en alguna población	rs10901080-T
1447949328	1447949330	case/control	12	23	cases = responders, controls = non-responders	Study Cohort					= 0.0463	OR				European	rs10793902	ASS1	hydroxyurea	26895070	Efficacy	yes	Patients with plateau fetal hemoglobin (HbF) levels below 20% were considered ‘HU nonresponders’, while patients with plateau HbF levels rising over 20% were considered ‘HU responders’.	Allele T is associated with increased response to hydroxyurea in people with Anemia, Sickle Cell and beta-Thalassemia as compared to allele C.	T			Is	Associated with	increased	response to		in people with	"Disease:Anemia, Sickle Cell", "Disease:Beta-thalassemia and related diseases"	and	C		0.604	0.177	0.452	0.25		0.427	0.3145	SNP sin predominancia en alguna población	rs10793902-T
1447951867	1447951873	cohort	4316		Rotterdam I and II	Study Cohort	0.06	A			= 2.13E-8	OR				Unknown	rs10514475		Selective serotonin reuptake inhibitors	25649181	Efficacy	yes	Measured with the center for epidemiological studies depression scale in Rotterdam study participants	Allele A is associated with increased response to Selective serotonin reuptake inhibitors in people with Depression as compared to allele G.	A			Is	Associated with	increased	response to		in people with	Disease:Depression		G		0.5	0.059	0.112	0.15		0.325	0.0855	SNP sin predominancia en alguna población	rs10514475-A
1447951874	1447951882	cohort	4316		Rotterdam I and II	Study Cohort	0.14	A			= 8.08E-5	OR				Unknown	rs6108160	PLCB1	Selective serotonin reuptake inhibitors	25649181	Efficacy	yes	Efficacy measured through change in the center for epidemiological studies depression scale in the Rotterdam cohort	Allele A is associated with increased response to Selective serotonin reuptake inhibitors in people with Depression as compared to allele G.	A			Is	Associated with	increased	response to		in people with	Disease:Depression		G		0.4	0.077	0.101	0.12		0.26	0.089	SNP sin predominancia en alguna población	rs6108160-A
1447952104	1447952172	cohort, prospective	19		cystic fibrosis with nonsense mutations in the CFTR gene	Disease	0.632	G			< 0.0001	OR				Unknown	rs113993959	CFTR	ataluren	21233271	Efficacy	yes	This nonsense mutation assessed in conjunction with the rs77010898 W128X nonsense mutation to show improved chloride transport.	Allele T is associated with response to ataluren in people with Cystic Fibrosis as compared to allele G.	T			Is	Associated with		response to		in people with	Disease:Cystic Fibrosis		G						0.002		0.002	SNP sin predominancia en alguna población	rs113993959-T
1447952179	1447952181	cohort, prospective	19		cystic fibrosis with nonsense mutations in the CFTR gene	Disease	0.211	A			< 0.0001	OR				Unknown	rs77010898	CFTR	ataluren	21233271	Efficacy	yes	This nonsense mutation assessed in conjunction with the rs113993959 G542X nonsense mutation to show improved chloride transport.	Allele A is associated with response to ataluren in people with Cystic Fibrosis as compared to allele G.	A			Is	Associated with		response to		in people with	Disease:Cystic Fibrosis		G					0		0		SNP sin predominancia en alguna población	rs77010898-A
1447952247	1447952249	clinical trial, prospective	17		Cystic fibrosis	Disease	1	A			< 0.0001	OR				Unknown	rs77010898	CFTR	ataluren	18722008	Efficacy	yes	Phase II prospective trial of patients with at least one nonsense mutation. Participants received 3 doses of 16 mg/kg per day for 14 days, followed by 14 days no treatment, and an additional 14 days of treatment. Measured change in chloride transport.	Allele A is associated with response to ataluren in people with Cystic Fibrosis as compared to allele G.	A			Is	Associated with		response to		in people with	Disease:Cystic Fibrosis		G					0		0		SNP sin predominancia en alguna población	rs77010898-A
1447952261	1447952263	clinical trial, prospective	1		Cystic fibrosis	Disease	1	T			< 0.0001	OR				Unknown	rs75039782	CFTR	ataluren	18722008	Efficacy	yes	Phase II prospective trial of patients with at least one nonsense mutation. Participants received 3 doses of 16 mg/kg per day for 14 days, followed by 14 days no treatment, and an additional 14 days of treatment. Measured change in chloride transport.	Allele T is associated with response to ataluren in people with Cystic Fibrosis as compared to allele C.	T			Is	Associated with		response to		in people with	Disease:Cystic Fibrosis		C			0.009					0.009	SNP sin predominancia en alguna población	rs75039782-T
1447952428	1447952430	clinical trial, prospective	5		Cystic fibrosis	Disease	1	T			< 0.0001	OR				Unknown	rs113993959	CFTR	ataluren	18722008	Efficacy	yes	Phase II prospective trial of patients with at least one nonsense mutation. Participants received 3 doses of 16 mg/kg per day for 14 days, followed by 14 days no treatment, and an additional 14 days of treatment. Measured change in chloride transport.	Allele T is associated with response to ataluren in people with Cystic Fibrosis as compared to allele G.	T			Is	Associated with		response to		in people with	Disease:Cystic Fibrosis		G						0.002		0.002	SNP sin predominancia en alguna población	rs113993959-T
1447952758	1447952764	clinical trial	28		cystic fibrosis	Disease	0.47	T			= 0.002	OR				Unknown	rs113993959	CFTR	ataluren	20622033	Efficacy	yes	This nonsense mutation was considered together with other nonsense mutations in CFTR (rs1139959 G542X, rs77010898 W1282X, and rs75039782 3849+10kB). Efficacy measured as increased chloride transport and increased CFTR expression on epithelial cell surface. Treatment in two 28 day cycles: 14 days on and 14 days off treatment. Ataluren taken 3x/day with randomization for low and high doses. No chan…	Allele T is associated with response to ataluren in children with Cystic Fibrosis as compared to allele G.	T	Pediatric		Is	Associated with		response to		in children with	Disease:Cystic Fibrosis		G						0.002		0.002	SNP sin predominancia en alguna población	rs113993959-T
1447952765	1447952767	clinical trial	28		cystic fibrosis	Disease	0.13	A			= 0.002	OR				Unknown	rs77010898	CFTR	ataluren	20622033	Efficacy	yes	This nonsense mutation was considered together with other nonsense mutations in CFTR (rs1139959 G542X, rs77010898 W1282X, and rs75039782 3849+10kB). Efficacy measured as increased chloride transport and increased CFTR expression on epithelial cell surface. Treatment in two 28 day cycles: 14 days on and 14 days off treatment. Ataluren taken 3x/day with randomization for low and high doses. No chan…	Allele A is associated with response to ataluren in children with Cystic Fibrosis as compared to allele G.	A	Pediatric		Is	Associated with		response to		in children with	Disease:Cystic Fibrosis		G					0		0		SNP sin predominancia en alguna población	rs77010898-A
1447952771	1447952773	clinical trial	28		cystic fibrosis	Disease					= 0.002	OR				Unknown	rs75039782	CFTR	ataluren	20622033	Efficacy	yes	This nonsense mutation was considered together with other nonsense mutations in CFTR (rs1139959 G542X, rs77010898 W1282X, and rs75039782 3849+10kB). Efficacy measured as increased chloride transport and increased CFTR expression on epithelial cell surface. Treatment in two 28 day cycles: 14 days on and 14 days off treatment. Ataluren taken 3x/day with randomization for low and high doses. No chan…	Allele T is associated with response to ataluren in children with Cystic Fibrosis as compared to allele C.	T	Pediatric		Is	Associated with		response to		in children with	Disease:Cystic Fibrosis		C			0.009					0.009	SNP sin predominancia en alguna población	rs75039782-T
1447959603	1447959615				Combined p-value from discovery and validation stages	Study Cohort					= 6.74E-6	OR				Unknown	rs760316	FHIT	interferon beta-1a, interferon beta-1b	27001119	Efficacy	yes	In the discovery GWAS stage, the Bonferroni adjusted statistical significance threshold was <=1.74E-10, however no SNPs reached this level, likely due to sample size limitations, and so the significance level was set at <=1.0E-3. In the validation stage, the significance level was set at <0.05, and SNPs that did not have the same direction of response as the discovery stage were considered spurio…	Allele C is associated with increased response to interferon beta-1a and interferon beta-1b in people with Multiple Sclerosis as compared to allele T.	C			Is	Associated with	increased	response to	and	in people with	Disease:Multiple Sclerosis		T		0.12	0.39	0.25	0.13	0.28	0.125	0.306667	SNP sin predominancia en alguna población	rs760316-C
[truncated: 663 more rows]
